# Supplementary material for: De novo assembly of the complete organelle genome sequences of azuki bean (Vigna angularis) using next-generation sequencers
Source: PubMed Central journal article supplement — Breed Sci. 2013 Jun 1;63(2):176–82. doi: 10.1270/jsbbs.63.176 (PMC3688379; doi:10.1270/jsbbs.63.176), 2013-06-01
Supplement: 63_176_1.pdf [file 63_176_1.pdf]

Supplemental Table 1. Genes coded in azuki bean cpDNA

| Name       | Type | Region                     |
|------------|------|----------------------------|
| accD       | CDS  | 59241..60755               |
| atpA       | CDS  | 52595..54127               |
| atpB       | CDS  | 10342..11838               |
| atpE       | CDS  | 11835..12236               |
| atpF_exon1 | CDS  | 51254..51397               |
| atpF_exon2 | CDS  | 52112..52510               |
| atpH       | CDS  | 50592..50837               |
| atpI       | CDS  | 48839..49582               |
| ccsA       | CDS  | 110941..111928             |
| cemA       | CDS  | 62370..63053               |
| clpP_exon1 | CDS  | complement(72339..72457)   |
| clpP_exon2 | CDS  | complement(71385..71681)   |
| clpP_exon3 | CDS  | complement(70407..70625)   |
| matK       | CDS  | complement(5024..6538)     |
| ndhA_exon1 | CDS  | complement(118068..118619) |
| ndhA_exon2 | CDS  | complement(116244..116783) |
| ndhB_exon1 | CDS  | complement(94177..94899)   |
| ndhB_exon1 | CDS  | 138071..138793             |
| ndhB_exon2 | CDS  | complement(92729..93484)   |
| ndhB_exon2 | CDS  | 139486..140241             |
| ndhC       | CDS  | 13504..13866               |
| ndhD       | CDS  | complement(112181..113677) |
| ndhE       | CDS  | complement(114353..114658) |
| ndhF       | CDS  | complement(107724..109973) |
| ndhG       | CDS  | complement(114877..115407) |
| ndhH       | CDS  | complement(118621..119803) |
| ndhI       | CDS  | complement(115673..116158) |
| ndhJ       | CDS  | 14652..15128               |
| ndhK       | CDS  | 13911..14549               |
| petA       | CDS  | 63231..64193               |
| petB       | CDS  | 75315..76775               |
| petD_exon1 | CDS  | 76978..76986               |
| petD_exon2 | CDS  | 77705..78178               |
| petG       | CDS  | 66745..66858               |
| petL       | CDS  | 66491..66586               |
| petN       | CDS  | complement(35053..35142)   |
| psaA       | CDS  | 21915..24167               |
| psaB       | CDS  | 24193..26397               |
| psaC       | CDS  | complement(113796..114041) |
| psaI       | CDS  | 60984..61088               |
| psaJ       | CDS  | 67435..67569               |
| psbA       | CDS  | complement(3299..4360)     |
| psbB       | CDS  | 72860..74386               |
| psbC       | CDS  | complement(28776..30197)   |
| psbD       | CDS  | complement(30145..31206)   |
| psbE       | CDS  | complement(65308..65559)   |
| psbF       | CDS  | complement(65179..65298)   |
| psbH       | CDS  | 74966..75187               |

|             |      |                            |
|-------------|------|----------------------------|
| psbI        | CDS  | complement(55998..56108)   |
| psbJ        | CDS  | complement(64724..64846)   |
| psbK        | CDS  | complement(56582..56767)   |
| psbL        | CDS  | complement(65040..65156)   |
| psbM        | CDS  | 34353..34457               |
| psbN        | CDS  | complement(74717..74848)   |
| psbT        | CDS  | 74551..74658               |
| psbZ        | CDS  | complement(27929..28117)   |
| rbcL        | CDS  | complement(8132..9562)     |
| rpl12_exon1 | CDS  | complement(83272..83665)   |
| rpl12_exon1 | CDS  | 149305..149698             |
| rpl12_exon2 | CDS  | complement(82177..82611)   |
| rpl12_exon2 | CDS  | 150359..150793             |
| rpl14       | CDS  | 2391..2759                 |
| rpl16       | CDS  | 850..2257                  |
| rpl20       | CDS  | complement(68866..69225)   |
| rpl23       | CDS  | complement(83684..83965)   |
| rpl23       | CDS  | 149005..149286             |
| rpl32       | CDS  | 110380..110541             |
| rpl33       | CDS  | 68052..68186               |
| rpoA        | CDS  | complement(78414..79415)   |
| rpoB        | CDS  | 37241..40453               |
| rpoC_exon1  | CDS  | 40480..40914               |
| rpoC_exon2  | CDS  | 41679..43298               |
| rpoC2       | CDS  | 43507..47598               |
| rps11       | CDS  | complement(79486..79902)   |
| rps12_exon1 | CDS  | complement(70068..70181)   |
| rps12_exon2 | CDS  | complement(96338..96568)   |
| rps12_exon2 | CDS  | 136402..136632             |
| rps12_exon3 | CDS  | complement(95782..95805)   |
| rps12_exon3 | CDS  | 137165..137188             |
| rps14       | CDS  | 26520..26822               |
| rps15       | CDS  | complement(119902..120174) |
| rps18       | CDS  | 68332..68640               |
| rps19       | CDS  | complement(81844..82122)   |
| rps19       | CDS  | 150848..151126             |
| rps2        | CDS  | 47883..48593               |
| rps3        | CDS  | 35..685                    |
| rps4        | CDS  | 18011..18616               |
| rps7        | CDS  | complement(95260..95727)   |
| rps7        | CDS  | 137243..137710             |
| rps8        | CDS  | complement(80828..81232)   |
| rrn16       | rRNA | 98666..100156              |
| rrn16       | rRNA | complement(132814..134304) |
| rrn23       | rRNA | 102577..105388             |
| rrn23       | rRNA | complement(127582..130393) |
| rrn4.5      | rRNA | 105499..105602             |
| rrn4.5      | rRNA | complement(127368..127471) |
| rrn5        | rRNA | 105831..105951             |
| rrn5        | rRNA | complement(127019..127139) |

|                |      |                            |
|----------------|------|----------------------------|
| trnA-UGC_exon1 | tRNA | 101535..101572             |
| trnA-UGC_exon1 | tRNA | complement(131398..131435) |
| trnA-UGC_exon2 | tRNA | 102384..102418             |
| trnA-UGC_exon2 | tRNA | complement(130552..130586) |
| trnC-GCA       | tRNA | complement(36166..36236)   |
| trnD-GUC       | tRNA | 33890..33963               |
| trnE-UUC       | tRNA | 33212..33284               |
| trnF-GAA       | tRNA | complement(15739..15811)   |
| trnM-CAU       | tRNA | 26976..27049               |
| trnG-UCC       | tRNA | complement(27149..27219)   |
| trnH-GUG       | tRNA | complement(2957..3030)     |
| trnI-CAU       | tRNA | complement(84410..84483)   |
| trnI-CAU       | tRNA | 148487..148560             |
| trnI-GAU_exon1 | tRNA | 100453..100494             |
| trnI-GAU_exon1 | tRNA | complement(132476..132517) |
| trnI-GAU_exon2 | tRNA | 101436..101472             |
| trnI-GAU_exon2 | tRNA | complement(131498..131534) |
| trnK-UUU_exon1 | tRNA | complement(7253..7289)     |
| trnK-UUU_exon2 | tRNA | complement(4654..4688)     |
| trnL-CAA       | tRNA | complement(92043..92123)   |
| trnL-CAA       | tRNA | 140847..140927             |
| trnL-UAA_exon1 | tRNA | complement(16736..16772)   |
| trnL-UAA_exon2 | tRNA | complement(16183..16232)   |
| trnL-UAG       | tRNA | 110782..110861             |
| trnM-CAU       | tRNA | complement(12362..12434)   |
| trnN-GUU       | tRNA | complement(106845..106916) |
| trnN-GUU       | tRNA | 126054..126125             |
| trnP-UGG       | tRNA | 67235..67308               |
| trnQ-UUG       | tRNA | 57220..57291               |
| trnR-ACG       | tRNA | 106201..106274             |
| trnR-ACG       | tRNA | complement(126696..126769) |
| trnR-UCU       | tRNA | complement(54298..54369)   |
| trnS-GCU       | tRNA | 55782..55869               |
| trnS-GGA       | tRNA | complement(18835..18922)   |
| trnS-UGA       | tRNA | 28479..28571               |
| trnT-GGU       | tRNA | complement(32358..32429)   |
| trnT-UGU       | tRNA | 17664..17736               |
| trnV-GAC       | tRNA | 98353..98424               |
| trnV-GAC       | tRNA | complement(134546..134617) |
| trnV-UAC_exon1 | tRNA | complement(13238..13274)   |
| trnV-UAC_exon2 | tRNA | complement(12611..12649)   |
| trnW-CCA       | tRNA | complement(66989..67062)   |
| trnY-GUA       | tRNA | 33353..33436               |
| ycf1           | CDS  | complement(120539..125221) |
| ycf2           | CDS  | 84571..91447               |
| ycf2           | CDS  | complement(141524..148399) |
| ycf3_exon1     | CDS  | 19178..19303               |
| ycf3_exon2     | CDS  | 19994..20221               |
| ycf3_exon2     | CDS  | 21027..21179               |
| ycf4           | CDS  | 61273..61863               |

---
