# Supplementary material for: De novo assembly of the complete organelle genome sequences of azuki bean (Vigna angularis) using next-generation sequencers
Source: PubMed Central journal article supplement — Breed Sci. 2013 Jun 1;63(2):176–82. doi: 10.1270/jsbbs.63.176 (PMC3688379; doi:10.1270/jsbbs.63.176), 2013-06-01
Supplement: 63_176_2.pdf [file 63_176_2.pdf]

Supplemental Table 2. Genes coded in azuki bean mtDNA

| Name        | Type | Region                     |
|-------------|------|----------------------------|
| atp1        | CDS  | 175263..176786             |
| atp4        | CDS  | 214689..215273             |
| atp6        | CDS  | complement(288339..289064) |
| atp8        | CDS  | 169975..170475             |
| atp9        | CDS  | complement(291160..291732) |
| atp9-1      | CDS  | complement(113870..114094) |
| atp9-2      | CDS  | 355783..356007             |
| ccmB        | CDS  | 11970..12590               |
| ccmC        | CDS  | 396311..397033             |
| ccmFc_exon1 | CDS  | 365008..365786             |
| ccmFc_exon2 | CDS  | 369872..370421             |
| ccmFn       | CDS  | complement(194889..196625) |
| cob         | CDS  | 265075..266256             |
| cox1        | CDS  | 219829..221412             |
| cox3        | CDS  | 376489..377286             |
| matR        | CDS  | complement(65331..67340)   |
| mttB        | CDS  | 241186..241908             |
| nad1_exon1  | CDS  | 13277..13663               |
| nad1_exon2  | CDS  | 222873..222953             |
| nad1_exon3  | CDS  | 224410..224601             |
| nad1_exon4  | CDS  | complement(67987..68045)   |
| nad1_exon5  | CDS  | complement(64580..64838)   |
| nad2_exon1  | CDS  | 147501..147653             |
| nad2_exon2  | CDS  | 148901..149290             |
| nad2_exon3  | CDS  | 96384..96546               |
| nad2_exon4  | CDS  | 99101..99672               |
| nad2_exon5  | CDS  | 101149..101337             |
| nad3        | CDS  | 170698..171054             |
| nad4_exon1  | CDS  | 86537..86997               |
| nad4_exon2  | CDS  | 88409..89013               |
| nad4_exon3  | CDS  | 92161..92583               |
| nad4_exon4  | CDS  | 95123..95211               |
| nad4L       | CDS  | 214191..214493             |
| nad5_exon1  | CDS  | complement(120832..121061) |
| nad5_exon2  | CDS  | complement(118744..119959) |
| nad5_exon3  | CDS  | 181269..181290             |
| nad5_exon4  | CDS  | 183939..184333             |
| nad5_exon5  | CDS  | 185254..185412             |
| nad6        | CDS  | 16994..17611               |
| nad7_exon1  | CDS  | 356261..356403             |
| nad7_exon2  | CDS  | 357298..357366             |
| nad7_exon3  | CDS  | 358704..359170             |
| nad7_exon4  | CDS  | 360230..360473             |
| nad7_exon5  | CDS  | 362500..362761             |
| rpl6        | CDS  | 229112..229618             |
| rps1        | CDS  | complement(121261..121869) |
| rps10_exon1 | CDS  | 216456..216705             |
| rps10_exon2 | CDS  | 219510..219622             |

|            |      |                            |
|------------|------|----------------------------|
| rps12      | CDS  | 171099..171476             |
| rps14      | CDS  | 263875..264177             |
| rps15      | CDS  | 263314..263871             |
| rps3_exon1 | CDS  | 226138..226211             |
| rps3_exon2 | CDS  | 227601..229218             |
| rps4       | CDS  | complement(314563..315603) |
| rrn5       | rRNA | complement(125676..125791) |
| rrnL       | rRNA | 255072..258211             |
| rrnS       | rRNA | complement(125958..127955) |
| trnC-GCA   | tRNA | 331540..331612             |
| trnC-GCA   | tRNA | complement(384632..384702) |
| trnE-TTC   | tRNA | complement(62430..62501)   |
| trnF-GAA   | tRNA | 41230..41303               |
| trnM-1     | tRNA | 258620..258693             |
| trnM-2     | tRNA | complement(144237..144308) |
| trnG-GCC   | tRNA | 207846..207917             |
| trnH-cp    | tRNA | 345872..345945             |
| trnI-cp    | tRNA | 71405..71486               |
| trnK-TTT   | tRNA | 300298..300370             |
| trnM-cp    | tRNA | complement(61472..61544)   |
| trnN-cp    | tRNA | complement(141697..141768) |
| trnP-TCG   | tRNA | 41562..41636               |
| trnQ-TTG   | tRNA | 211719..211790             |
| trnW-cp    | tRNA | complement(129719..129792) |
| trnY-GTA   | tRNA | complement(141236..141318) |

---
