# Supplementary material for: De novo assembly of the complete organelle genome sequences of azuki bean (Vigna angularis) using next-generation sequencers
Source: PubMed Central journal article supplement — Breed Sci. 2013 Jun 1;63(2):176–82. doi: 10.1270/jsbbs.63.176 (PMC3688379; doi:10.1270/jsbbs.63.176), 2013-06-01
Supplement: 63_176_3.pdf [file 63_176_3.pdf]

Supplemental Table 3. Repeat sequences in azuki bean mtDNA

| Repeat | Length | copy | Position                   |
|--------|--------|------|----------------------------|
| 1      | 1215   | a    | 404090..841                |
|        |        | b    | 193239..194455             |
| 2      | 36     | a    | 5726..5761                 |
|        |        | b    | 141157..141192             |
| 3      | 31     | a    | 12671..12701               |
|        |        | b    | complement(291814..291844) |
| 4      | 36     | a    | 146234..146269             |
|        |        | b    | complement(291777..291812) |
| 5      | 18     | a    | 12732..12749               |
|        |        | b    | 382931..382948             |
| 6      | 51     | a    | 16892..16942               |
|        |        | b    | 263207..263257             |
| 7      | 46     | a    | 16897..16942               |
|        |        | b    | complement(144108..144153) |
|        |        | c    | 263212..263257             |
| 8      | 24     | a    | 16893..16916               |
|        |        | b    | 34104..34127               |
|        |        | c    | 263208..263231             |
| 9      | 16     | a    | 18218..18263               |
|        |        | b    | 306817..306862             |
| 10     | 85     | a    | 21853..21937               |
|        |        | b    | 401094..401187             |
| 11     | 47     | a    | 125951..125998             |
|        |        | b    | 21914..21961               |
| 12     | 74     | a    | 23472..23545               |
|        |        | b    | complement(316264..316337) |
| 13     | 25     | a    | 25178..25202               |
|        |        | b    | 313627..313651             |
| 14     | 40     | a    | 28173..28212               |
|        |        | b    | complement(134002..134041) |
| 15     | 28     | a    | 28201..28228               |
|        |        | b    | complement(133812..133839) |
| 16     | 30     | a    | 29743..29772               |
|        |        | b    | complement(334629..334658) |
| 17     | 23     | a    | 34073..34195               |
|        |        | b    | complement(273198..273314) |
| 18     | 34     | a    | 34094..34127               |
|        |        | b    | 16881..16916               |
| 19     | 36     | a    | 36107..36142               |
|        |        | b    | 166426..166461             |
| 20     | 34     | a    | 36108..36141               |
|        |        | b    | 166427..166460             |
|        |        | c    | 258251..258284             |
| 21     | 30     | a    | 36113..36142               |
|        |        | b    | 166432..166461             |
|        |        | c    | complement(256811..256840) |
| 22     | 37     | d    | complement(258256..258284) |
|        |        | a    | 40996..41032               |
| 23     | 30     | b    | complement(332179..332215) |
|        |        | a    | 41258..41287               |
| 24     | 49     | b    | complement(289931..289960) |
|        |        | a    | 41508..41556               |
| 25     | 29     | b    | complement(298388..298436) |
|        |        | a    | 44719..44747               |
| 26     | 35     | b    | complement(316408..316436) |
|        |        | a    | 46126..46160               |
|        |        | b    | 295515..295549             |

|    |     |   |                            |
|----|-----|---|----------------------------|
| 27 | 29  | a | 54167..54195               |
|    |     | b | 70403..70431               |
|    |     | a | 55604..55627               |
|    |     | b | complement(210611..210634) |
| 28 | 24  | c | complement(219319..219342) |
|    |     | d | 254771..254794             |
|    |     | e | complement(361196..361219) |
| 29 | 25  | a | 55897..55921               |
|    |     | b | complement(234981..235005) |
| 30 | 25  | a | 55974..55998               |
|    |     | b | 208152..208176             |
| 31 | 30  | a | 59298..59327               |
|    |     | b | complement(159038..159067) |
| 32 | 38  | a | 62936..62973               |
|    |     | b | 282441..282478             |
| 33 | 30  | a | 64635..64664               |
|    |     | b | complement(225993..226022) |
| 34 | 42  | a | 64910..64951               |
|    |     | b | complement(88286..88327)   |
| 35 | 38  | a | 65021..65058               |
|    |     | b | 227278..227315             |
| 36 | 31  | a | 65064..65094               |
|    |     | b | complement(126552..126582) |
| 37 | 43  | a | 66747..66789               |
|    |     | b | 365596..365638             |
| 38 | 30  | a | 67019..67048               |
|    |     | b | 244031..244060             |
|    |     | a | 68512..68621               |
|    |     | b | complement(210611..210720) |
| 39 | 110 | c | complement(219319..219428) |
|    |     | d | 254685..254794             |
|    |     | e | complement(361196..361305) |
| 40 | 181 | a | 68512..68691               |
|    |     | b | complement(361126..361305) |
| 41 | 31  | a | 68700..68730               |
|    |     | b | complement(126591..126621) |
| 42 | 27  | a | 69579..69605               |
|    |     | b | 87605..87631               |
| 43 | 69  | a | 75403..75471               |
|    |     | b | complement(239168..239236) |
| 44 | 28  | a | 78051..78078               |
|    |     | b | complement(10967..10994)   |
| 45 | 44  | a | 80134..80177               |
|    |     | b | 143547..143590             |
| 46 | 41  | a | 92775..92815               |
|    |     | b | complement(224725..224765) |
| 47 | 84  | a | 97467..97550               |
|    |     | b | 358362..358445             |
| 48 | 62  | a | 101337..101598             |
|    |     | b | complement(341474..341735) |
| 49 | 40  | a | 101742..101781             |
|    |     | b | 341289..341328             |
| 50 | 30  | a | 110569..110598             |
|    |     | b | 233542..233571             |
| 51 | 33  | a | 111037..111069             |
|    |     | b | 353297..353329             |
| 52 | 321 | a | 113798..114118             |
|    |     | b | complement(355759..356079) |

|    |     |   |                            |
|----|-----|---|----------------------------|
| 53 | 137 | a | 114018..114154             |
|    |     | b | complement(146537..146673) |
| 54 | 116 | a | 114074..114189             |
|    |     | b | complement(402480..402595) |
| 55 | 44  | a | 120061..120104             |
|    |     | b | complement(227472..227515) |
| 56 | 62  | a | 120366..120427             |
|    |     | b | complement(226732..226793) |
| 57 | 30  | a | 121570..121599             |
|    |     | b | 121627..121656             |
| 58 | 100 | a | 121866..121965             |
|    |     | b | complement(174287..174386) |
|    |     | a | complement(174320..174364) |
| 59 | 45  | b | 121888..121932             |
|    |     | c | complement(216379..216423) |
| 60 | 204 | a | 122790..122993             |
|    |     | b | complement(175077..175281) |
| 61 | 40  | a | 127951..127990             |
|    |     | b | 289637..289676             |
| 62 | 28  | a | 136681..136708             |
|    |     | b | 398847..398874             |
| 63 | 41  | a | 138874..138914             |
|    |     | b | 364399..364439             |
| 64 | 115 | a | 139243..139358             |
|    |     | b | 270466..270581             |
| 65 | 25  | a | 141783..141807             |
|    |     | b | complement(312920..312944) |
| 66 | 88  | a | 143790..143877             |
|    |     | b | 272942..273029             |
| 67 | 84  | a | 144070..144153             |
|    |     | b | complement(263212..263295) |
| 68 | 109 | a | complement(169796..169904) |
|    |     | b | 144134..144242             |
| 69 | 40  | a | 144134..144173             |
|    |     | b | complement(169865..169904) |
|    |     | a | 289514..289549             |
| 70 | 36  | b | complement(394750..394785) |
|    |     | c | 144134..144169             |
|    |     | d | complement(169869..169904) |
| 71 | 80  | a | 144236..144315             |
|    |     | b | complement(258613..258692) |
| 72 | 50  | a | 144358..144407             |
|    |     | b | complement(254944..254993) |
| 73 | 103 | a | 146015..146117             |
|    |     | b | complement(336492..336597) |
| 74 | 88  | a | 146204..146291             |
|    |     | b | complement(291754..291842) |
| 75 | 66  | a | 12673..12738               |
|    |     | b | 146204..146269             |
|    |     | a | 355759..355859             |
| 76 | 101 | b | complement(114018..114118) |
|    |     | c | 146573..146673             |
| 77 | 147 | a | 146747..146893             |
|    |     | b | 394973..395119             |
| 78 | 47  | a | 148840..148886             |
|    |     | b | 224352..224398             |
| 79 | 25  | a | 336698..336722             |
|    |     | b | 156890..156914             |

|     |     |   |                            |
|-----|-----|---|----------------------------|
| 80  | 30  | a | 162812..162841             |
|     |     | b | complement(296362..296391) |
| 81  | 29  | a | 164988..165016             |
|     |     | b | complement(263390..263418) |
| 82  | 172 | a | 169865..170036             |
|     |     | b | 394746..394917             |
| 83  | 46  | a | 170627..170672             |
|     |     | b | 396142..396187             |
| 84  | 61  | a | 171015..171075             |
|     |     | b | 171468..171528             |
| 85  | 89  | a | 172525..172613             |
|     |     | b | complement(344479..344575) |
|     |     | a | 172637..172678             |
| 86  | 42  | b | 376184..376225             |
|     |     | c | 172688..172749             |
|     |     | d | 178033..178094             |
| 87  | 43  | a | 176278..176320             |
|     |     | b | 192579..192621             |
| 88  | 149 | a | complement(289080..289228) |
|     |     | b | 177524..177672             |
| 89  | 188 | a | complement(344990..345165) |
|     |     | b | 177485..177672             |
| 90  | 60  | a | 213724..213783             |
|     |     | b | 177613..177672             |
| 91  | 101 | a | 177853..177953             |
|     |     | b | 213946..214046             |
| 92  | 64  | a | 177953..178016             |
|     |     | b | 214001..214064             |
| 93  | 32  | a | complement(344649..344680) |
|     |     | b | 177994..178025             |
| 94  | 24  | a | 178150..178173             |
|     |     | b | 292731..292754             |
| 95  | 26  | a | 292765..292790             |
|     |     | b | 178163..178188             |
| 96  | 34  | a | 178227..178260             |
|     |     | b | 322490..322523             |
| 97  | 32  | a | 178392..178423             |
|     |     | b | 322660..322691             |
| 98  | 40  | a | 181153..181192             |
|     |     | b | complement(313302..313341) |
| 99  | 30  | a | 182405..182434             |
|     |     | b | 285388..285417             |
| 100 | 51  | a | 198514..198664             |
|     |     | b | complement(351636..351785) |
| 101 | 50  | a | 211443..211492             |
|     |     | b | complement(385946..385995) |
|     |     | a | 215464..215496             |
| 102 | 37  | b | complement(254655..254687) |
|     |     | c | 361303..361335             |
| 103 | 24  | a | 215463..215486             |
|     |     | b | 331738..331761             |
| 104 | 24  | a | complement(382843..382866) |
|     |     | b | 216403..216426             |
| 105 | 28  | a | 217209..217236             |
|     |     | b | 277197..277224             |
| 106 | 38  | a | 220034..220071             |
|     |     | b | complement(313617..313654) |
| 107 | 29  | a | 221435..221463             |
|     |     | b | complement(243894..243922) |

|     |     |   |                            |
|-----|-----|---|----------------------------|
| 108 | 27  | a | 226033..226059             |
|     |     | b | 364803..364829             |
| 109 | 40  | a | 357798..357837             |
|     |     | b | 226758..226797             |
| 110 | 50  | a | 227143..227192             |
|     |     | b | complement(346484..346533) |
| 111 | 31  | a | 232169..232199             |
|     |     | b | complement(383580..383610) |
| 112 | 43  | a | 238317..238359             |
|     |     | b | 11024..11066               |
| 113 | 24  | a | 247855..247878             |
|     |     | b | 325886..325909             |
| 114 | 235 | a | 250286..250520             |
|     |     | b | 341889..342123             |
| 115 | 28  | a | 254600..254627             |
|     |     | b | complement(273591..273618) |
| 116 | 49  | a | 254910..254958             |
|     |     | b | 355255..355308             |
| 117 | 25  | a | 255072..255096             |
|     |     | b | 262806..262830             |
| 118 | 44  | a | 2982..3025                 |
|     |     | b | 258291..258334             |
| 119 | 25  | a | 258483..258507             |
|     |     | b | 361358..361382             |
| 120 | 123 | a | 259471..259599             |
|     |     | b | 276277..276396             |
| 121 | 37  | a | 289229..289265             |
|     |     | b | 345139..345175             |
| 122 | 103 | a | 289255..289357             |
|     |     | b | 336138..336240             |
| 123 | 119 | a | 336287..336404             |
|     |     | b | 289428..289546             |
| 124 | 48  | a | 289529..289576             |
|     |     | b | 291828..291875             |
| 125 | 60  | a | 313180..313239             |
|     |     | b | complement(362746..362809) |
| 126 | 40  | a | 316176..316215             |
|     |     | b | 397121..397160             |
| 127 | 29  | a | 319992..320020             |
|     |     | b | complement(4053..4081)     |
| 128 | 103 | a | 289083..289185             |
|     |     | b | 344990..345101             |
|     |     | a | complement(114074..114118) |
| 129 | 45  | b | 146573..146617             |
|     |     | c | 355759..355803             |
|     |     | d | 402551..402595             |
| 130 | 39  | a | 382910..382948             |
|     |     | b | 12714..12749               |
|     |     | a | complement(114074..114154) |
| 131 | 81  | b | 146537..146617             |
|     |     | c | 402515..402595             |

---
