# Supplementary material for: De novo assembly of the complete organelle genome sequences of azuki bean (Vigna angularis) using next-generation sequencers
Source: PubMed Central journal article supplement — Breed Sci. 2013 Jun 1;63(2):176–82. doi: 10.1270/jsbbs.63.176 (PMC3688379; doi:10.1270/jsbbs.63.176), 2013-06-01
Supplement: 63_176_4.pdf [file 63_176_4.pdf]

Supplemental Table 4. SNPs and indels between cpDNAs of azuki bean and mungbean

| azuki bean cp position | substitution | mungbean cp position |
|------------------------|--------------|----------------------|
| 277                    | A T          | 267                  |
| 589                    | T G          | 579                  |
| 790                    | C A          | 780                  |
| 821                    | G T          | 811                  |
| 826                    | T G          | 816                  |
| 891                    | A T          | 881                  |
| 928                    | A C          | 918                  |
| 971                    | C A          | 961                  |
| 1045                   | T G          | 1035                 |
| 1201                   | A .          | 1190                 |
| 1318                   | T G          | 1307                 |
| 1438                   | C A          | 1427                 |
| 1533                   | . G          | 1523                 |
| 1533                   | . A          | 1524                 |
| 1533                   | . A          | 1525                 |
| 1533                   | . T          | 1526                 |
| 1533                   | . T          | 1527                 |
| 1533                   | . T          | 1528                 |
| 1533                   | . C          | 1529                 |
| 1533                   | . A          | 1530                 |
| 1533                   | . T          | 1531                 |
| 1533                   | . T          | 1532                 |
| 1533                   | . A          | 1533                 |
| 1533                   | . C          | 1534                 |
| 1533                   | . A          | 1535                 |
| 1533                   | . T          | 1536                 |
| 1533                   | . C          | 1537                 |
| 1534                   | . G          | 1539                 |
| 1540                   | G T          | 1545                 |
| 1584                   | T G          | 1589                 |
| 1587                   | A T          | 1592                 |
| 1596                   | C A          | 1601                 |
| 1655                   | T G          | 1660                 |
| 1716                   | A C          | 1721                 |
| 1834                   | A C          | 1839                 |
| 2024                   | G C          | 2029                 |
| 2144                   | T A          | 2149                 |
| 2266                   | C T          | 2271                 |
| 2357                   | G .          | 2361                 |
| 2358                   | T .          | 2361                 |
| 2359                   | T .          | 2361                 |
| 2360                   | T .          | 2361                 |
| 2361                   | T .          | 2361                 |
| 2362                   | T .          | 2361                 |
| 2363                   | T .          | 2361                 |
| 2364                   | A .          | 2361                 |
| 2696                   | C T          | 2693                 |
| 2766                   | G A          | 2763                 |
| 2782                   | A C          | 2779                 |
| 2893                   | A C          | 2890                 |
| 2905                   | C G          | 2902                 |

|      |   |   |      |
|------|---|---|------|
| 2912 | C | A | 2909 |
| 3046 | G | T | 3043 |
| 3047 | A | G | 3044 |
| 3081 | T | C | 3078 |
| 3088 | A | . | 3084 |
| 3096 | T | C | 3092 |
| 3160 | A | C | 3156 |
| 3170 | G | C | 3166 |
| 3199 | A | . | 3194 |
| 3200 | T | . | 3194 |
| 3201 | C | . | 3194 |
| 3202 | C | . | 3194 |
| 3203 | A | . | 3194 |
| 3204 | A | . | 3194 |
| 3205 | T | . | 3194 |
| 3206 | A | . | 3194 |
| 3207 | T | . | 3194 |
| 3208 | C | . | 3194 |
| 3209 | C | . | 3194 |
| 3210 | A | . | 3194 |
| 3211 | A | . | 3194 |
| 3212 | T | . | 3194 |
| 3213 | A | . | 3194 |
| 3214 | T | . | 3194 |
| 3215 | A | . | 3194 |
| 3216 | A | . | 3194 |
| 3217 | A | . | 3194 |
| 3218 | G | . | 3194 |
| 3219 | G | . | 3194 |
| 3725 | G | A | 3700 |
| 4482 | G | T | 4457 |
| 4564 | A | C | 4539 |
| 4608 | A | C | 4583 |
| 4631 | A | C | 4606 |
| 4850 | G | T | 4825 |
| 4931 | . | A | 4907 |
| 4954 | . | T | 4931 |
| 5077 | A | C | 5054 |
| 5078 | G | T | 5055 |
| 5129 | T | G | 5106 |
| 5262 | G | A | 5239 |
| 5406 | G | T | 5383 |
| 5658 | C | A | 5635 |
| 5664 | A | G | 5641 |
| 5771 | C | T | 5748 |
| 5889 | C | T | 5866 |
| 5981 | A | T | 5958 |
| 6084 | G | A | 6061 |
| 6172 | T | G | 6149 |
| 6416 | G | T | 6393 |
| 6423 | G | A | 6400 |
| 6424 | G | T | 6401 |
| 6504 | G | A | 6481 |

|      |   |   |      |
|------|---|---|------|
| 6535 | A | C | 6512 |
| 6633 | A | T | 6610 |
| 6635 | T | G | 6612 |
| 6740 | T | . | 6716 |
| 6741 | T | . | 6716 |
| 6870 | . | A | 6846 |
| 6881 | C | T | 6857 |
| 6947 | A | C | 6923 |
| 6950 | A | C | 6926 |
| 6954 | . | A | 6931 |
| 6960 | T | G | 6937 |
| 7051 | . | G | 7029 |
| 7234 | A | T | 7212 |
| 7334 | . | A | 7313 |
| 7478 | T | A | 7457 |
| 7501 | A | T | 7480 |
| 7594 | A | C | 7573 |
| 7620 | C | A | 7599 |
| 7635 | T | G | 7614 |
| 7668 | A | C | 7647 |
| 7710 | G | T | 7689 |
| 7711 | A | T | 7690 |
| 7752 | G | T | 7731 |
| 7773 | A | C | 7752 |
| 7839 | A | G | 7818 |
| 7847 | T | G | 7826 |
| 7871 | G | T | 7850 |
| 7894 | . | T | 7874 |
| 7894 | . | T | 7875 |
| 7894 | . | A | 7876 |
| 7894 | . | A | 7877 |
| 7894 | . | T | 7878 |
| 7894 | . | A | 7879 |
| 7894 | . | T | 7880 |
| 7894 | . | A | 7881 |
| 7894 | . | A | 7882 |
| 7894 | . | G | 7883 |
| 7894 | . | A | 7884 |
| 7894 | . | T | 7885 |
| 7894 | . | A | 7886 |
| 7894 | . | A | 7887 |
| 7894 | . | A | 7888 |
| 7894 | . | T | 7889 |
| 7894 | . | T | 7890 |
| 7894 | . | T | 7891 |
| 7894 | . | C | 7892 |
| 7894 | . | A | 7893 |
| 7894 | . | T | 7894 |
| 7894 | . | A | 7895 |
| 7894 | . | A | 7896 |
| 7894 | . | T | 7897 |
| 7894 | . | A | 7898 |
| 7894 | . | T | 7899 |

|      |   |   |      |
|------|---|---|------|
| 7894 | . | A | 7900 |
| 7894 | . | G | 7901 |
| 7894 | . | G | 7902 |
| 7969 | C | G | 7977 |
| 8005 | G | A | 8013 |
| 8052 | G | T | 8060 |
| 8058 | . | A | 8067 |
| 8058 | . | A | 8068 |
| 8058 | . | T | 8069 |
| 8058 | . | A | 8070 |
| 8058 | . | A | 8071 |
| 8059 | . | G | 8073 |
| 8111 | G | A | 8125 |
| 8147 | . | A | 8162 |
| 8147 | . | A | 8163 |
| 8147 | . | T | 8164 |
| 8147 | . | T | 8165 |
| 8147 | . | C | 8166 |
| 8147 | . | A | 8167 |
| 8147 | . | A | 8168 |
| 8147 | . | A | 8169 |
| 8147 | . | T | 8170 |
| 8147 | . | A | 8171 |
| 8147 | . | G | 8172 |
| 8147 | . | T | 8173 |
| 8147 | . | A | 8174 |
| 8147 | . | T | 8175 |
| 8147 | . | C | 8176 |
| 8147 | . | C | 8177 |
| 8147 | . | A | 8178 |
| 8147 | . | C | 8179 |
| 8147 | . | T | 8180 |
| 8147 | . | G | 8181 |
| 8147 | . | C | 8182 |
| 8147 | . | T | 8183 |
| 8147 | . | T | 8184 |
| 8147 | . | C | 8185 |
| 8147 | . | G | 8186 |
| 8147 | . | A | 8187 |
| 8147 | . | A | 8188 |
| 8147 | . | T | 8189 |
| 8147 | . | T | 8190 |
| 8147 | . | C | 8191 |
| 8147 | . | A | 8192 |
| 8147 | . | A | 8193 |
| 8147 | . | A | 8194 |
| 8147 | . | T | 8195 |
| 8147 | . | A | 8196 |
| 8147 | . | G | 8197 |
| 8147 | . | T | 8198 |
| 8147 | . | A | 8199 |
| 8147 | . | T | 8200 |
| 8147 | . | C | 8201 |

|      |   |   |       |
|------|---|---|-------|
| 8147 | . | C | 8202  |
| 8147 | . | A | 8203  |
| 8147 | . | C | 8204  |
| 8147 | . | T | 8205  |
| 8147 | . | G | 8206  |
| 8147 | . | C | 8207  |
| 8147 | . | T | 8208  |
| 8148 | . | C | 8210  |
| 8148 | . | G | 8211  |
| 8148 | . | A | 8212  |
| 8156 | . | A | 8221  |
| 8156 | . | G | 8222  |
| 8156 | . | T | 8223  |
| 8156 | . | A | 8224  |
| 8156 | . | T | 8225  |
| 8156 | . | C | 8226  |
| 8156 | . | C | 8227  |
| 8156 | . | A | 8228  |
| 8156 | . | C | 8229  |
| 8156 | . | T | 8230  |
| 8156 | . | G | 8231  |
| 8156 | . | C | 8232  |
| 8158 | . | C | 8235  |
| 8159 | . | A | 8237  |
| 8159 | . | A | 8238  |
| 8159 | . | T | 8239  |
| 8159 | . | T | 8240  |
| 8159 | . | C | 8241  |
| 8159 | . | A | 8242  |
| 8159 | . | A | 8243  |
| 8159 | . | A | 8244  |
| 8159 | . | T | 8245  |
| 8159 | . | T | 8246  |
| 8159 | . | T | 8247  |
| 8159 | . | T | 8248  |
| 8318 | T | C | 8407  |
| 8429 | C | T | 8518  |
| 8431 | G | T | 8520  |
| 8594 | C | T | 8683  |
| 8936 | A | C | 9025  |
| 9121 | T | C | 9210  |
| 9264 | T | A | 9353  |
| 9270 | T | C | 9359  |
| 9283 | C | G | 9372  |
| 9572 | C | A | 9661  |
| 9646 | C | T | 9735  |
| 9661 | A | C | 9750  |
| 9775 | . | T | 9865  |
| 9838 | G | T | 9928  |
| 9909 | C | A | 9999  |
| 9952 | G | C | 10042 |
| 9954 | G | A | 10044 |
| 9993 | T | G | 10083 |

|       |   |   |       |
|-------|---|---|-------|
| 9998  | C | T | 10088 |
| 10001 | . | A | 10092 |
| 10041 | C | G | 10132 |
| 10065 | C | A | 10156 |
| 10076 | . | A | 10168 |
| 10099 | T | G | 10191 |
| 10121 | C | A | 10213 |
| 10150 | T | A | 10242 |
| 10166 | T | A | 10258 |
| 10193 | T | G | 10285 |
| 10223 | A | T | 10315 |
| 10255 | C | T | 10347 |
| 10383 | . | A | 10476 |
| 10580 | C | T | 10673 |
| 10721 | C | T | 10814 |
| 11123 | G | A | 11216 |
| 11486 | G | A | 11579 |
| 11505 | C | G | 11598 |
| 11711 | T | C | 11804 |
| 12269 | . | A | 12363 |
| 12269 | . | A | 12364 |
| 12269 | . | A | 12365 |
| 12269 | . | A | 12366 |
| 12269 | . | G | 12367 |
| 12269 | . | A | 12368 |
| 12269 | . | A | 12369 |
| 12271 | C | G | 12371 |
| 12288 | . | A | 12389 |
| 12344 | C | T | 12445 |
| 12428 | T | G | 12529 |
| 12436 | A | . | 12536 |
| 12439 | . | A | 12540 |
| 12488 | A | C | 12589 |
| 12496 | T | C | 12597 |
| 12655 | T | . | 12755 |
| 12679 | A | C | 12779 |
| 12723 | . | T | 12824 |
| 12723 | . | C | 12825 |
| 12723 | . | A | 12826 |
| 12723 | . | G | 12827 |
| 12723 | . | T | 12828 |
| 12723 | . | T | 12829 |
| 12727 | G | T | 12833 |
| 12758 | . | G | 12865 |
| 12758 | . | C | 12866 |
| 12758 | . | A | 12867 |
| 12758 | . | A | 12868 |
| 12758 | . | A | 12869 |
| 12765 | C | A | 12876 |
| 12796 | T | G | 12907 |
| 13038 | A | T | 13149 |
| 13099 | . | A | 13211 |
| 13099 | . | A | 13212 |

|       |   |   |       |
|-------|---|---|-------|
| 13148 | . | A | 13262 |
| 13185 | C | A | 13299 |
| 13323 | T | G | 13437 |
| 13328 | C | A | 13442 |
| 13380 | G | A | 13494 |
| 13431 | A | C | 13545 |
| 13788 | G | T | 13902 |
| 14114 | C | A | 14228 |
| 14562 | A | C | 14676 |
| 14673 | C | T | 14787 |
| 14876 | C | T | 14990 |
| 15133 | A | C | 15247 |
| 15138 | C | T | 15252 |
| 15212 | C | A | 15326 |
| 15229 | G | A | 15343 |
| 15253 | T | G | 15367 |
| 15254 | T | G | 15368 |
| 15272 | C | T | 15386 |
| 15321 | T | A | 15435 |
| 15444 | T | . | 15557 |
| 15459 | A | . | 15571 |
| 15460 | G | . | 15571 |
| 15461 | G | . | 15571 |
| 15462 | A | . | 15571 |
| 15463 | A | . | 15571 |
| 15464 | A | . | 15571 |
| 15502 | T | . | 15608 |
| 15503 | A | . | 15608 |
| 15504 | T | . | 15608 |
| 15505 | A | . | 15608 |
| 15506 | T | . | 15608 |
| 15507 | C | . | 15608 |
| 15523 | . | A | 15625 |
| 15579 | G | A | 15681 |
| 15813 | G | T | 15831 |
| 15820 | C | A | 15838 |
| 15903 | C | A | 15921 |
| 15909 | T | G | 15927 |
| 15941 | . | C | 15960 |
| 15941 | . | G | 15961 |
| 15941 | . | T | 15962 |
| 15941 | . | T | 15963 |
| 15941 | . | G | 15964 |
| 15943 | . | C | 15967 |
| 15943 | . | A | 15968 |
| 15943 | . | A | 15969 |
| 15943 | . | A | 15970 |
| 15943 | . | A | 15971 |
| 15945 | . | A | 15974 |
| 15945 | . | A | 15975 |
| 15946 | . | A | 15977 |
| 15946 | . | T | 15978 |
| 15946 | . | A | 15979 |

|       |   |   |       |
|-------|---|---|-------|
| 15946 | . | T | 15980 |
| 15946 | . | T | 15981 |
| 15946 | . | A | 15982 |
| 15946 | . | A | 15983 |
| 15946 | . | T | 15984 |
| 15946 | . | T | 15985 |
| 15947 | . | A | 15987 |
| 15948 | . | A | 15989 |
| 15948 | . | C | 15990 |
| 15948 | . | A | 15991 |
| 15953 | A | T | 15996 |
| 15956 | . | T | 16000 |
| 15956 | . | C | 16001 |
| 15956 | . | A | 16002 |
| 15956 | . | A | 16003 |
| 15956 | . | A | 16004 |
| 15956 | . | A | 16005 |
| 15956 | . | A | 16006 |
| 15956 | . | A | 16007 |
| 15957 | . | T | 16009 |
| 15963 | C | G | 16015 |
| 15964 | . | G | 16017 |
| 15965 | A | T | 16018 |
| 15968 | . | A | 16022 |
| 15971 | A | T | 16025 |
| 15973 | A | T | 16027 |
| 15974 | C | A | 16028 |
| 15977 | G | T | 16031 |
| 15989 | A | C | 16043 |
| 16055 | A | C | 16109 |
| 16082 | T | G | 16136 |
| 16142 | A | C | 16196 |
| 16253 | G | A | 16307 |
| 16437 | G | T | 16491 |
| 16504 | T | G | 16558 |
| 16511 | G | A | 16565 |
| 16512 | C | T | 16566 |
| 16521 | A | C | 16575 |
| 16595 | G | T | 16649 |
| 16619 | A | C | 16673 |
| 16869 | A | . | 16922 |
| 16870 | T | . | 16922 |
| 16871 | T | . | 16922 |
| 16872 | A | . | 16922 |
| 16873 | A | . | 16922 |
| 16874 | A | . | 16922 |
| 16875 | T | . | 16922 |
| 16876 | A | . | 16922 |
| 16877 | T | . | 16922 |
| 16878 | T | . | 16922 |
| 16879 | A | . | 16922 |
| 16880 | A | . | 16922 |
| 16913 | T | G | 16955 |



|       |   |   |       |
|-------|---|---|-------|
| 17084 | . | T | 17127 |
| 17084 | . | G | 17128 |
| 17084 | . | T | 17129 |
| 17084 | . | T | 17130 |
| 17084 | . | T | 17131 |
| 17084 | . | T | 17132 |
| 17090 | G | T | 17138 |
| 17099 | T | G | 17147 |
| 17234 | A | C | 17282 |
| 17235 | G | T | 17283 |
| 17245 | . | A | 17294 |
| 17245 | . | T | 17295 |
| 17252 | C | A | 17302 |
| 17295 | T | . | 17344 |
| 17296 | T | . | 17344 |
| 17297 | A | . | 17344 |
| 17298 | A | . | 17344 |
| 17299 | G | . | 17344 |
| 17300 | T | . | 17344 |
| 17301 | A | . | 17344 |
| 17302 | C | . | 17344 |
| 17362 | G | . | 17403 |
| 17363 | A | . | 17403 |
| 17364 | A | . | 17403 |
| 17365 | A | . | 17403 |
| 17366 | T | . | 17403 |
| 17367 | A | . | 17403 |
| 17370 | T | . | 17405 |
| 17371 | T | . | 17405 |
| 17372 | C | . | 17405 |
| 17378 | A | . | 17410 |
| 17379 | T | . | 17410 |
| 17380 | T | . | 17410 |
| 17381 | A | . | 17410 |
| 17382 | G | . | 17410 |
| 17387 | A | . | 17414 |
| 17388 | A | . | 17414 |
| 17389 | T | . | 17414 |
| 17390 | A | . | 17414 |
| 17391 | A | . | 17414 |
| 17392 | A | . | 17414 |
| 17393 | T | . | 17414 |
| 17394 | T | . | 17414 |
| 17395 | A | . | 17414 |
| 17396 | T | . | 17414 |
| 17397 | A | . | 17414 |
| 17454 | C | T | 17471 |
| 17506 | C | A | 17523 |
| 17516 | G | T | 17533 |
| 17545 | G | T | 17562 |
| 17557 | A | C | 17574 |
| 17562 | G | T | 17579 |
| 17572 | C | A | 17589 |

|       |   |   |       |
|-------|---|---|-------|
| 17582 | C | A | 17599 |
| 17607 | A | C | 17624 |
| 17900 | T | G | 17917 |
| 17918 | T | G | 17935 |
| 17923 | T | G | 17940 |
| 18062 | G | A | 18079 |
| 18279 | G | A | 18296 |
| 18408 | G | T | 18425 |
| 18742 | A | C | 18759 |
| 18791 | G | T | 18808 |
| 18913 | A | C | 18930 |
| 18987 | A | C | 19004 |
| 19004 | . | T | 19022 |
| 19004 | . | A | 19023 |
| 19131 | C | A | 19150 |
| 19301 | . | T | 19321 |
| 19307 | A | T | 19327 |
| 19309 | A | T | 19329 |
| 19310 | . | T | 19331 |
| 19310 | . | A | 19332 |
| 19314 | . | A | 19337 |
| 19314 | . | A | 19338 |
| 19403 | T | G | 19427 |
| 19494 | T | . | 19517 |
| 19495 | A | . | 19517 |
| 19496 | G | . | 19517 |
| 19497 | T | . | 19517 |
| 19498 | A | . | 19517 |
| 19499 | C | . | 19517 |
| 19500 | T | . | 19517 |
| 19501 | G | . | 19517 |
| 19502 | A | . | 19517 |
| 19503 | T | . | 19517 |
| 19592 | G | . | 19605 |
| 19593 | A | . | 19605 |
| 19594 | C | . | 19605 |
| 19595 | T | . | 19605 |
| 19596 | A | . | 19605 |
| 19597 | A | . | 19605 |
| 19598 | C | . | 19605 |
| 19599 | A | . | 19605 |
| 19737 | T | . | 19742 |
| 19755 | C | T | 19760 |
| 20031 | T | C | 20036 |
| 20267 | A | C | 20272 |
| 20285 | C | A | 20290 |
| 20469 | A | C | 20474 |
| 20475 | . | T | 20481 |
| 20475 | . | A | 20482 |
| 20475 | . | T | 20483 |
| 20475 | . | A | 20484 |
| 20475 | . | A | 20485 |
| 20475 | . | T | 20486 |

|       |   |   |       |
|-------|---|---|-------|
| 20599 | A | C | 20610 |
| 20606 | C | . | 20616 |
| 20607 | T | . | 20616 |
| 20608 | T | . | 20616 |
| 20609 | T | . | 20616 |
| 20610 | A | . | 20616 |
| 20736 | T | G | 20742 |
| 20763 | A | C | 20769 |
| 20811 | G | . | 20816 |
| 20813 | T | . | 20817 |
| 20816 | A | . | 20819 |
| 20817 | A | . | 20819 |
| 20818 | T | . | 20819 |
| 20819 | T | . | 20819 |
| 20820 | C | . | 20819 |
| 20821 | T | . | 20819 |
| 20822 | T | . | 20819 |
| 20877 | . | C | 20875 |
| 20878 | A | T | 20876 |
| 21152 | G | A | 21150 |
| 21196 | C | A | 21194 |
| 21197 | T | A | 21195 |
| 21198 | T | A | 21196 |
| 21199 | T | G | 21197 |
| 21251 | C | G | 21249 |
| 21287 | A | C | 21285 |
| 21321 | T | . | 21318 |
| 21322 | T | . | 21318 |
| 21323 | T | . | 21318 |
| 21324 | T | . | 21318 |
| 21380 | C | A | 21374 |
| 21387 | T | C | 21381 |
| 21453 | T | G | 21447 |
| 21532 | . | G | 21527 |
| 21533 | T | A | 21528 |
| 21542 | C | A | 21537 |
| 21623 | C | A | 21618 |
| 21625 | C | A | 21620 |
| 22800 | G | A | 22795 |
| 22842 | A | C | 22837 |
| 22860 | A | G | 22855 |
| 22897 | C | A | 22892 |
| 23214 | A | C | 23209 |
| 23376 | G | A | 23371 |
| 23880 | T | G | 23875 |
| 26296 | C | T | 26291 |
| 26392 | T | . | 26386 |
| 26393 | A | . | 26386 |
| 26408 | C | A | 26401 |
| 26434 | C | T | 26427 |
| 26796 | C | A | 26789 |
| 26822 | A | T | 26815 |
| 26834 | A | G | 26827 |

|       |   |   |       |
|-------|---|---|-------|
| 27026 | T | G | 27019 |
| 27029 | T | . | 27021 |
| 27030 | T | . | 27021 |
| 27031 | T | . | 27021 |
| 27032 | T | . | 27021 |
| 27033 | A | . | 27021 |
| 27034 | T | . | 27021 |
| 27076 | A | C | 27063 |
| 27259 | A | C | 27246 |
| 27317 | A | C | 27304 |
| 27328 | G | T | 27315 |
| 27334 | G | T | 27321 |
| 27354 | A | C | 27341 |
| 27400 | T | . | 27386 |
| 27401 | A | . | 27386 |
| 27402 | T | . | 27386 |
| 27403 | A | . | 27386 |
| 27404 | A | . | 27386 |
| 27405 | T | . | 27386 |
| 27409 | G | A | 27390 |
| 27431 | C | G | 27412 |
| 27458 | A | . | 27438 |
| 27459 | G | . | 27438 |
| 27460 | G | . | 27438 |
| 27461 | T | . | 27438 |
| 27462 | A | . | 27438 |
| 27463 | A | . | 27438 |
| 27464 | G | . | 27438 |
| 27465 | T | . | 27438 |
| 27466 | T | . | 27438 |
| 27467 | C | . | 27438 |
| 27468 | C | . | 27438 |
| 27469 | T | . | 27438 |
| 27470 | A | . | 27438 |
| 27471 | T | . | 27438 |
| 27472 | T | . | 27438 |
| 27473 | A | . | 27438 |
| 27474 | A | . | 27438 |
| 27475 | T | . | 27438 |
| 27476 | A | . | 27438 |
| 27477 | T | . | 27438 |
| 27478 | T | . | 27438 |
| 27479 | T | . | 27438 |
| 27480 | A | . | 27438 |
| 27481 | A | . | 27438 |
| 27482 | G | . | 27438 |
| 27483 | A | . | 27438 |
| 27484 | A | . | 27438 |
| 27485 | A | . | 27438 |
| 27486 | A | . | 27438 |
| 27519 | T | G | 27471 |
| 27521 | T | G | 27473 |
| 27526 | A | C | 27478 |

|       |   |   |       |
|-------|---|---|-------|
| 27566 | G | T | 27518 |
| 27590 | G | T | 27542 |
| 27599 | T | G | 27551 |
| 27621 | T | . | 27572 |
| 27622 | C | . | 27572 |
| 27623 | A | . | 27572 |
| 27624 | T | . | 27572 |
| 27625 | A | . | 27572 |
| 27656 | A | C | 27603 |
| 27658 | A | T | 27605 |
| 27680 | G | T | 27627 |
| 27722 | G | T | 27669 |
| 27804 | T | . | 27750 |
| 27805 | T | . | 27750 |
| 27806 | T | . | 27750 |
| 27858 | G | A | 27802 |
| 28174 | A | . | 28117 |
| 28175 | A | . | 28117 |
| 28284 | . | G | 28227 |
| 28284 | . | G | 28228 |
| 28305 | A | C | 28249 |
| 28383 | A | C | 28327 |
| 28429 | G | T | 28373 |
| 28578 | A | C | 28522 |
| 28594 | G | . | 28537 |
| 28598 | T | . | 28540 |
| 28599 | G | . | 28540 |
| 28600 | A | C | 28541 |
| 28603 | A | . | 28543 |
| 28606 | A | C | 28546 |
| 28610 | A | . | 28549 |
| 28611 | G | . | 28549 |
| 28612 | C | . | 28549 |
| 28613 | C | T | 28550 |
| 28615 | A | . | 28551 |
| 28616 | G | . | 28551 |
| 28617 | T | . | 28551 |
| 28635 | T | G | 28569 |
| 28653 | T | G | 28587 |
| 28659 | C | A | 28593 |
| 28660 | T | A | 28594 |
| 28710 | . | T | 28645 |
| 28762 | G | A | 28697 |
| 28776 | A | C | 28711 |
| 29049 | A | C | 28984 |
| 29343 | A | G | 29278 |
| 29400 | T | C | 29335 |
| 29623 | T | A | 29558 |
| 29667 | G | A | 29602 |
| 29751 | T | C | 29686 |
| 29811 | G | A | 29746 |
| 30487 | A | G | 30422 |
| 30529 | A | G | 30464 |

|       |   |   |       |
|-------|---|---|-------|
| 30700 | A | G | 30635 |
| 31288 | T | G | 31223 |
| 31407 | T | G | 31342 |
| 31414 | A | C | 31349 |
| 31555 | A | C | 31490 |
| 31565 | T | G | 31500 |
| 31634 | C | A | 31569 |
| 31648 | T | C | 31583 |
| 31669 | A | T | 31604 |
| 31670 | T | C | 31605 |
| 31672 | A | T | 31607 |
| 31680 | . | C | 31616 |
| 31681 | . | T | 31618 |
| 31681 | . | T | 31619 |
| 31681 | . | T | 31620 |
| 31681 | . | T | 31621 |
| 31681 | . | T | 31622 |
| 31681 | . | T | 31623 |
| 31685 | . | T | 31628 |
| 31689 | A | T | 31632 |
| 31691 | A | C | 31634 |
| 31693 | G | A | 31636 |
| 31694 | A | T | 31637 |
| 31699 | C | . | 31641 |
| 31700 | T | A | 31642 |
| 31758 | G | A | 31700 |
| 31809 | G | T | 31751 |
| 31816 | A | T | 31758 |
| 31817 | A | T | 31759 |
| 31840 | C | A | 31782 |
| 31841 | T | G | 31783 |
| 31844 | C | A | 31786 |
| 31845 | T | G | 31787 |
| 31900 | T | A | 31842 |
| 32151 | . | T | 32094 |
| 32153 | A | C | 32096 |
| 32166 | A | T | 32109 |
| 32197 | . | A | 32141 |
| 32197 | . | C | 32142 |
| 32197 | . | T | 32143 |
| 32197 | . | T | 32144 |
| 32197 | . | T | 32145 |
| 32230 | . | T | 32179 |
| 32252 | A | C | 32201 |
| 32401 | G | T | 32350 |
| 32402 | A | C | 32351 |
| 32471 | A | C | 32420 |
| 32504 | T | A | 32453 |
| 32505 | T | A | 32454 |
| 32506 | T | A | 32455 |
| 32607 | . | A | 32557 |
| 32650 | C | A | 32600 |
| 32687 | T | G | 32637 |

|       |   |   |       |
|-------|---|---|-------|
| 32699 | C | G | 32649 |
| 32772 | A | T | 32722 |
| 32818 | . | T | 32769 |
| 32818 | . | T | 32770 |
| 32831 | T | C | 32783 |
| 32832 | T | G | 32784 |
| 32838 | C | A | 32790 |
| 32853 | T | C | 32805 |
| 32887 | T | C | 32839 |
| 32971 | C | T | 32923 |
| 33000 | T | . | 32951 |
| 33028 | T | . | 32978 |
| 33029 | A | . | 32978 |
| 33030 | G | . | 32978 |
| 33031 | A | . | 32978 |
| 33032 | A | . | 32978 |
| 33033 | A | . | 32978 |
| 33034 | T | . | 32978 |
| 33035 | A | . | 32978 |
| 33036 | G | . | 32978 |
| 33037 | A | . | 32978 |
| 33038 | A | . | 32978 |
| 33039 | A | . | 32978 |
| 33040 | T | . | 32978 |
| 33041 | G | . | 32978 |
| 33042 | A | . | 32978 |
| 33043 | T | . | 32978 |
| 33044 | T | . | 32978 |
| 33045 | A | . | 32978 |
| 33046 | A | . | 32978 |
| 33047 | T | . | 32978 |
| 33048 | A | . | 32978 |
| 33049 | A | . | 32978 |
| 33050 | A | . | 32978 |
| 33051 | A | . | 32978 |
| 33052 | A | . | 32978 |
| 33053 | A | . | 32978 |
| 33054 | T | . | 32978 |
| 33055 | T | . | 32978 |
| 33083 | . | A | 33007 |
| 33084 | C | T | 33008 |
| 33162 | T | C | 33086 |
| 33279 | C | A | 33203 |
| 33290 | G | T | 33214 |
| 33295 | T | G | 33219 |
| 33414 | A | . | 33337 |
| 33415 | A | . | 33337 |
| 33487 | G | T | 33409 |
| 33517 | . | T | 33440 |
| 33564 | A | C | 33487 |
| 33601 | G | A | 33524 |
| 33611 | A | . | 33533 |
| 33647 | . | A | 33570 |

|       |   |   |       |
|-------|---|---|-------|
| 33656 | G | C | 33579 |
| 33773 | G | C | 33696 |
| 33935 | A | C | 33858 |
| 33944 | G | T | 33867 |
| 34051 | A | C | 33974 |
| 34087 | . | T | 34011 |
| 34246 | T | C | 34170 |
| 34273 | . | T | 34198 |
| 34473 | C | T | 34398 |
| 34576 | G | A | 34501 |
| 34578 | A | C | 34503 |
| 34589 | . | A | 34515 |
| 34641 | . | T | 34568 |
| 34641 | . | C | 34569 |
| 34641 | . | T | 34570 |
| 34641 | . | A | 34571 |
| 34709 | G | A | 34639 |
| 35000 | G | T | 34930 |
| 35029 | A | T | 34959 |
| 35098 | A | G | 35028 |
| 35295 | A | T | 35225 |
| 35296 | A | C | 35226 |
| 35309 | G | T | 35239 |
| 35310 | A | T | 35240 |
| 35313 | C | A | 35243 |
| 35363 | A | C | 35293 |
| 35425 | T | . | 35354 |
| 35426 | A | . | 35354 |
| 35427 | T | . | 35354 |
| 35428 | T | . | 35354 |
| 35429 | A | . | 35354 |
| 35430 | T | . | 35354 |
| 35431 | T | . | 35354 |
| 35432 | C | . | 35354 |
| 35433 | T | . | 35354 |
| 35434 | T | . | 35354 |
| 35435 | A | . | 35354 |
| 35436 | A | . | 35354 |
| 35437 | G | . | 35354 |
| 35438 | G | . | 35354 |
| 35439 | A | . | 35354 |
| 35440 | T | . | 35354 |
| 35441 | T | . | 35354 |
| 35444 | A | . | 35356 |
| 35445 | T | . | 35356 |
| 35446 | A | . | 35356 |
| 35447 | A | . | 35356 |
| 35448 | A | . | 35356 |
| 35449 | A | . | 35356 |
| 35450 | T | . | 35356 |
| 35451 | T | . | 35356 |
| 35452 | T | . | 35356 |
| 35453 | T | . | 35356 |



|       |   |   |       |
|-------|---|---|-------|
| 35454 | A | . | 35356 |
| 35561 | C | A | 35463 |
| 35567 | G | T | 35469 |
| 35579 | . | T | 35482 |
| 35608 | A | C | 35511 |
| 35619 | C | A | 35522 |
| 35681 | G | A | 35584 |
| 35685 | T | G | 35588 |
| 35704 | A | C | 35607 |
| 35706 | T | A | 35609 |
| 35717 | C | A | 35620 |
| 35752 | A | C | 35655 |
| 35782 | A | G | 35685 |
| 35800 | C | A | 35703 |
| 35904 | C | A | 35807 |
| 35968 | T | A | 35871 |
| 36011 | G | T | 35914 |
| 36073 | C | A | 35976 |
| 36075 | A | . | 35977 |
| 36241 | C | G | 36143 |
| 36392 | . | T | 36295 |
| 36397 | A | C | 36300 |
| 36403 | C | A | 36306 |
| 36533 | . | A | 36437 |
| 36533 | . | T | 36438 |
| 36533 | . | T | 36439 |
| 36533 | . | A | 36440 |
| 36533 | . | C | 36441 |
| 36534 | . | A | 36443 |
| 36574 | T | . | 36482 |
| 36575 | T | . | 36482 |
| 36639 | C | A | 36546 |
| 36659 | T | G | 36566 |
| 36790 | C | A | 36697 |
| 36837 | G | T | 36744 |
| 36993 | C | A | 36900 |
| 37001 | A | C | 36908 |
| 37037 | . | C | 36945 |
| 37037 | . | C | 36946 |
| 37037 | . | T | 36947 |
| 37037 | . | C | 36948 |
| 37037 | . | T | 36949 |
| 37037 | . | T | 36950 |
| 37037 | . | T | 36951 |
| 37037 | . | T | 36952 |
| 37037 | . | C | 36953 |
| 37037 | . | A | 36954 |
| 37037 | . | T | 36955 |
| 37037 | . | A | 36956 |
| 37037 | . | A | 36957 |
| 37037 | . | T | 36958 |
| 37037 | . | A | 36959 |
| 37037 | . | G | 36960 |

|       |   |   |       |
|-------|---|---|-------|
| 37037 | . | G | 36961 |
| 37037 | . | T | 36962 |
| 37037 | . | A | 36963 |
| 37037 | . | T | 36964 |
| 37037 | . | T | 36965 |
| 37037 | . | T | 36966 |
| 37037 | . | C | 36967 |
| 37037 | . | C | 36968 |
| 37037 | . | A | 36969 |
| 37190 | T | G | 37122 |
| 37353 | G | T | 37285 |
| 37829 | T | A | 37761 |
| 37991 | A | C | 37923 |
| 38024 | T | C | 37956 |
| 38954 | T | C | 38886 |
| 39073 | A | G | 39005 |
| 39529 | C | T | 39461 |
| 39602 | G | C | 39534 |
| 40573 | A | C | 40505 |
| 40757 | C | T | 40689 |
| 40925 | A | T | 40857 |
| 40995 | A | C | 40927 |
| 41008 | G | T | 40940 |
| 41045 | C | A | 40977 |
| 41068 | A | C | 41000 |
| 41074 | A | C | 41006 |
| 41101 | A | . | 41032 |
| 41104 | C | A | 41035 |
| 41106 | C | A | 41037 |
| 41128 | C | G | 41059 |
| 41360 | A | C | 41291 |
| 41460 | C | A | 41391 |
| 41475 | C | A | 41406 |
| 41541 | . | T | 41473 |
| 41541 | . | A | 41474 |
| 41541 | . | G | 41475 |
| 41541 | . | A | 41476 |
| 41541 | . | T | 41477 |
| 41541 | . | T | 41478 |
| 41541 | . | A | 41479 |
| 41541 | . | G | 41480 |
| 41541 | . | A | 41481 |
| 41541 | . | A | 41482 |
| 41541 | . | T | 41483 |
| 41541 | . | T | 41484 |
| 41541 | . | T | 41485 |
| 41541 | . | T | 41486 |
| 41541 | . | T | 41487 |
| 41541 | . | T | 41488 |
| 41541 | . | T | 41489 |
| 41541 | . | A | 41490 |
| 41541 | . | T | 41491 |
| 41541 | . | C | 41492 |

|       |   |   |       |
|-------|---|---|-------|
| 41541 | . | G | 41493 |
| 41541 | . | A | 41494 |
| 41541 | . | A | 41495 |
| 41541 | . | T | 41496 |
| 41541 | . | T | 41497 |
| 41541 | . | T | 41498 |
| 41541 | . | G | 41499 |
| 41541 | . | A | 41500 |
| 41541 | . | T | 41501 |
| 41541 | . | A | 41502 |
| 41541 | . | G | 41503 |
| 41541 | . | A | 41504 |
| 41541 | . | A | 41505 |
| 41541 | . | T | 41506 |
| 41541 | . | T | 41507 |
| 41541 | . | T | 41508 |
| 41541 | . | G | 41509 |
| 41541 | . | A | 41510 |
| 41541 | . | A | 41511 |
| 41541 | . | A | 41512 |
| 41541 | . | A | 41513 |
| 41541 | . | T | 41514 |
| 41541 | . | G | 41515 |
| 41541 | . | A | 41516 |
| 41541 | . | A | 41517 |
| 41541 | . | A | 41518 |
| 41541 | . | A | 41519 |
| 41541 | . | A | 41520 |
| 41541 | . | C | 41521 |
| 41541 | . | C | 41522 |
| 41541 | . | T | 41523 |
| 41541 | . | T | 41524 |
| 41543 | . | T | 41527 |
| 41543 | . | T | 41528 |
| 41543 | . | T | 41529 |
| 41543 | . | T | 41530 |
| 41543 | . | T | 41531 |
| 41543 | . | T | 41532 |
| 41546 | . | T | 41536 |
| 41546 | . | T | 41537 |
| 41546 | . | T | 41538 |
| 41546 | . | G | 41539 |
| 41546 | . | T | 41540 |
| 41546 | . | A | 41541 |
| 41546 | . | G | 41542 |
| 42399 | T | C | 42395 |
| 42430 | C | A | 42426 |
| 42480 | T | G | 42476 |
| 42898 | C | A | 42894 |
| 43276 | T | G | 43272 |
| 43353 | A | C | 43349 |
| 43497 | C | T | 43493 |
| 43722 | T | A | 43718 |

|       |   |   |       |
|-------|---|---|-------|
| 44173 | T | G | 44169 |
| 44482 | T | C | 44478 |
| 44675 | C | G | 44671 |
| 44755 | A | T | 44751 |
| 45229 | A | G | 45225 |
| 45331 | T | G | 45327 |
| 45566 | C | A | 45562 |
| 45890 | A | C | 45886 |
| 46066 | G | A | 46062 |
| 46139 | G | A | 46135 |
| 46235 | C | A | 46231 |
| 46291 | T | G | 46287 |
| 46350 | A | C | 46346 |
| 46384 | . | A | 46381 |
| 46384 | . | G | 46382 |
| 46384 | . | A | 46383 |
| 46384 | . | G | 46384 |
| 46384 | . | A | 46385 |
| 46384 | . | T | 46386 |
| 46384 | . | C | 46387 |
| 46384 | . | C | 46388 |
| 46384 | . | T | 46389 |
| 46384 | . | C | 46390 |
| 46384 | . | T | 46391 |
| 46384 | . | G | 46392 |
| 46384 | . | A | 46393 |
| 46384 | . | T | 46394 |
| 46384 | . | T | 46395 |
| 46384 | . | C | 46396 |
| 46384 | . | C | 46397 |
| 46384 | . | A | 46398 |
| 46384 | . | A | 46399 |
| 46384 | . | T | 46400 |
| 46384 | . | T | 46401 |
| 46384 | . | C | 46402 |
| 46384 | . | A | 46403 |
| 46384 | . | A | 46404 |
| 46439 | C | T | 46459 |
| 46453 | A | T | 46473 |
| 46516 | C | A | 46536 |
| 46618 | G | T | 46638 |
| 46655 | C | A | 46675 |
| 47101 | C | T | 47121 |
| 47230 | G | C | 47250 |
| 47527 | T | G | 47547 |
| 47547 | A | C | 47567 |
| 47611 | T | . | 47630 |
| 47612 | T | . | 47630 |
| 47613 | T | . | 47630 |
| 47614 | T | . | 47630 |
| 47615 | G | . | 47630 |
| 47616 | T | . | 47630 |
| 47617 | A | . | 47630 |

|       |   |   |       |
|-------|---|---|-------|
| 47677 | G | A | 47690 |
| 47681 | T | . | 47693 |
| 47696 | G | C | 47708 |
| 47759 | G | C | 47771 |
| 47828 | A | T | 47840 |
| 48090 | G | A | 48102 |
| 48228 | T | G | 48240 |
| 48301 | A | C | 48313 |
| 48624 | G | T | 48636 |
| 48640 | T | G | 48652 |
| 49112 | T | C | 49124 |
| 49544 | C | A | 49556 |
| 49552 | T | G | 49564 |
| 49689 | . | A | 49702 |
| 49800 | G | C | 49813 |
| 49888 | G | A | 49901 |
| 50038 | C | A | 50051 |
| 50195 | C | A | 50208 |
| 50201 | G | C | 50214 |
| 50205 | C | T | 50218 |
| 50279 | G | T | 50292 |
| 50338 | A | C | 50351 |
| 50364 | A | C | 50377 |
| 50433 | C | A | 50446 |
| 50845 | A | T | 50858 |
| 50899 | G | T | 50912 |
| 50920 | A | . | 50932 |
| 50921 | T | . | 50932 |
| 50922 | T | . | 50932 |
| 50923 | C | . | 50932 |
| 50961 | T | C | 50970 |
| 50971 | A | C | 50980 |
| 51106 | C | A | 51115 |
| 51115 | G | T | 51124 |
| 51701 | A | . | 51709 |
| 51723 | A | C | 51731 |
| 51753 | C | T | 51761 |
| 51848 | A | C | 51856 |
| 52036 | G | T | 52044 |
| 52578 | A | C | 52586 |
| 52619 | A | C | 52627 |
| 53249 | A | G | 53257 |
| 53312 | T | C | 53320 |
| 54090 | A | C | 54098 |
| 54166 | T | G | 54174 |
| 54198 | . | A | 54207 |
| 54199 | C | A | 54208 |
| 54210 | T | G | 54219 |
| 54391 | A | C | 54400 |
| 54426 | A | C | 54435 |
| 54431 | A | . | 54439 |
| 54432 | A | . | 54439 |
| 54433 | A | . | 54439 |

|       |   |   |       |
|-------|---|---|-------|
| 54434 | T | . | 54439 |
| 54435 | A | . | 54439 |
| 54509 | G | T | 54513 |
| 54595 | T | G | 54599 |
| 54868 | T | . | 54871 |
| 54920 | G | T | 54923 |
| 54969 | G | T | 55080 |
| 55048 | T | C | 55159 |
| 55304 | C | . | 55414 |
| 55318 | T | G | 55428 |
| 55320 | T | A | 55430 |
| 55384 | C | A | 55494 |
| 55392 | G | T | 55502 |
| 55416 | A | . | 55525 |
| 55417 | T | . | 55525 |
| 55418 | A | . | 55525 |
| 55419 | T | . | 55525 |
| 55422 | A | T | 55528 |
| 55443 | G | T | 55549 |
| 55487 | G | A | 55593 |
| 55517 | T | G | 55623 |
| 55521 | . | T | 55628 |
| 55559 | . | T | 55667 |
| 55559 | . | T | 55668 |
| 55559 | . | T | 55669 |
| 55559 | . | T | 55670 |
| 55559 | . | T | 55671 |
| 55559 | . | T | 55672 |
| 55559 | . | T | 55673 |
| 55595 | . | A | 55710 |
| 55614 | G | C | 55729 |
| 55662 | . | G | 55778 |
| 55663 | T | A | 55779 |
| 55823 | T | G | 56001 |
| 55832 | . | T | 56011 |
| 55841 | G | T | 56020 |
| 55847 | . | T | 56027 |
| 55878 | G | T | 56058 |
| 55889 | A | C | 56069 |
| 56377 | C | A | 56557 |
| 56383 | T | . | 56562 |
| 56384 | C | . | 56562 |
| 56385 | C | . | 56562 |
| 56386 | T | . | 56562 |
| 56387 | A | . | 56562 |
| 56399 | A | G | 56574 |
| 56524 | C | A | 56699 |
| 56593 | C | T | 56768 |
| 56765 | T | . | 56939 |
| 56784 | A | C | 56958 |
| 56839 | A | C | 57013 |
| 56913 | A | C | 57087 |
| 56917 | G | T | 57091 |

|       |   |   |       |
|-------|---|---|-------|
| 56918 | A | C | 57092 |
| 56928 | C | A | 57102 |
| 56945 | G | T | 57119 |
| 57062 | G | C | 57236 |
| 57090 | T | . | 57263 |
| 57146 | T | G | 57319 |
| 57310 | T | . | 57482 |
| 57312 | T | C | 57484 |
| 57313 | T | A | 57485 |
| 57314 | T | A | 57486 |
| 57315 | T | A | 57487 |
| 57316 | C | A | 57488 |
| 57350 | A | C | 57522 |
| 57472 | A | . | 57643 |
| 57579 | . | T | 57751 |
| 57579 | . | G | 57752 |
| 57579 | . | T | 57753 |
| 57579 | . | G | 57754 |
| 57579 | . | G | 57755 |
| 57579 | . | T | 57756 |
| 57583 | A | G | 57760 |
| 57630 | A | G | 57807 |
| 57662 | C | A | 57839 |
| 58055 | C | A | 57953 |
| 58069 | . | A | 57968 |
| 58069 | . | T | 57969 |
| 58069 | . | T | 57970 |
| 58069 | . | C | 57971 |
| 58069 | . | C | 57972 |
| 58125 | T | G | 58028 |
| 58201 | C | . | 58103 |
| 58202 | T | . | 58103 |
| 58203 | G | . | 58103 |
| 58204 | C | . | 58103 |
| 58236 | T | G | 58135 |
| 58271 | G | A | 58170 |
| 58378 | T | C | 58277 |
| 58389 | T | G | 58288 |
| 58421 | C | A | 58320 |
| 58442 | T | G | 58341 |
| 58467 | T | G | 58366 |
| 58518 | T | . | 58416 |
| 58519 | T | . | 58416 |
| 58520 | C | . | 58416 |
| 58521 | A | . | 58416 |
| 58522 | G | . | 58416 |
| 58523 | A | . | 58416 |
| 58524 | A | . | 58416 |
| 58525 | A | . | 58416 |
| 58526 | G | . | 58416 |
| 58568 | A | . | 58457 |
| 58569 | A | . | 58457 |
| 58570 | A | . | 58457 |

|       |   |   |       |
|-------|---|---|-------|
| 58571 | T | . | 58457 |
| 58572 | A | . | 58457 |
| 58573 | T | . | 58457 |
| 58574 | T | . | 58457 |
| 58575 | C | . | 58457 |
| 58576 | C | . | 58457 |
| 58577 | T | . | 58457 |
| 58578 | G | . | 58457 |
| 58579 | T | . | 58457 |
| 58580 | T | . | 58457 |
| 58593 | C | A | 58470 |
| 58637 | T | A | 58514 |
| 58661 | G | A | 58538 |
| 58677 | A | C | 58554 |
| 58733 | T | G | 58610 |
| 58979 | C | A | 58663 |
| 58996 | T | G | 58680 |
| 59077 | . | T | 58762 |
| 59093 | . | A | 58779 |
| 59093 | . | G | 58780 |
| 59093 | . | A | 58781 |
| 59093 | . | G | 58782 |
| 59093 | . | A | 58783 |
| 59093 | . | G | 58784 |
| 59093 | . | A | 58785 |
| 59207 | A | C | 58899 |
| 59351 | C | A | 59043 |
| 59416 | T | C | 59108 |
| 59677 | T | G | 59369 |
| 59734 | C | G | 59426 |
| 59768 | A | C | 59460 |
| 59769 | G | A | 59461 |
| 59794 | C | A | 59486 |
| 59806 | T | G | 59498 |
| 60226 | G | C | 59918 |
| 60363 | A | C | 60055 |
| 60415 | A | G | 60107 |
| 60467 | A | G | 60159 |
| 60695 | T | C | 60387 |
| 60705 | A | G | 60397 |
| 60706 | G | T | 60398 |
| 60719 | G | T | 60411 |
| 60722 | T | A | 60414 |
| 60838 | T | G | 60530 |
| 60847 | T | A | 60539 |
| 60854 | A | C | 60546 |
| 60876 | A | C | 60568 |
| 61021 | G | A | 60713 |
| 61054 | G | T | 60746 |
| 61118 | C | A | 60810 |
| 61206 | . | A | 60899 |
| 61206 | . | A | 60900 |
| 61206 | . | A | 60901 |



|       |   |   |       |
|-------|---|---|-------|
| 61206 | . | G | 60902 |
| 61226 | T | A | 60922 |
| 61248 | T | C | 60944 |
| 61310 | G | T | 61006 |
| 61339 | G | C | 61035 |
| 61394 | A | T | 61090 |
| 61578 | A | C | 61274 |
| 61582 | A | T | 61278 |
| 61849 | C | A | 61545 |
| 61865 | A | C | 61561 |
| 61877 | A | G | 61573 |
| 61896 | A | C | 61592 |
| 61902 | C | . | 61597 |
| 61903 | T | . | 61597 |
| 61904 | T | . | 61597 |
| 61905 | T | . | 61597 |
| 61906 | T | . | 61597 |
| 61907 | T | . | 61597 |
| 61908 | T | A | 61598 |
| 61946 | T | A | 61636 |
| 61963 | G | T | 61653 |
| 61971 | G | T | 61661 |
| 62040 | T | C | 61730 |
| 62075 | T | G | 61765 |
| 62093 | G | T | 61783 |
| 62114 | G | C | 61804 |
| 62182 | A | . | 61871 |
| 62410 | G | T | 62099 |
| 63052 | A | C | 62741 |
| 63057 | C | T | 62746 |
| 63574 | T | G | 63263 |
| 63768 | G | A | 63457 |
| 63820 | A | G | 63509 |
| 63942 | G | T | 63631 |
| 64059 | C | T | 63748 |
| 64074 | T | C | 63763 |
| 64163 | C | A | 63852 |
| 64245 | A | . | 63933 |
| 64246 | T | . | 63933 |
| 64264 | C | A | 63951 |
| 64275 | A | G | 63962 |
| 64301 | . | G | 63989 |
| 64322 | C | A | 64010 |
| 64324 | A | T | 64012 |
| 64366 | A | C | 64054 |
| 64386 | T | G | 64074 |
| 64472 | . | T | 64161 |
| 64472 | . | T | 64162 |
| 64472 | . | T | 64163 |
| 64472 | . | A | 64164 |
| 64472 | . | T | 64165 |
| 64472 | . | T | 64166 |
| 64472 | . | G | 64167 |

|       |   |   |       |
|-------|---|---|-------|
| 64472 | . | T | 64168 |
| 64472 | . | A | 64169 |
| 64472 | . | T | 64170 |
| 64472 | . | A | 64171 |
| 64472 | . | T | 64172 |
| 64472 | . | A | 64173 |
| 64472 | . | A | 64174 |
| 64498 | A | G | 64200 |
| 64644 | A | C | 64346 |
| 64882 | G | A | 64584 |
| 64909 | T | . | 64610 |
| 64910 | A | . | 64610 |
| 64911 | T | . | 64610 |
| 64912 | A | . | 64610 |
| 64936 | T | . | 64633 |
| 64937 | T | . | 64633 |
| 64938 | A | . | 64633 |
| 64939 | T | . | 64633 |
| 64940 | T | . | 64633 |
| 64941 | C | . | 64633 |
| 64942 | C | . | 64633 |
| 64943 | T | . | 64633 |
| 64944 | A | . | 64633 |
| 64945 | T | . | 64633 |
| 64946 | T | . | 64633 |
| 64947 | T | . | 64633 |
| 64948 | T | . | 64633 |
| 64949 | T | . | 64633 |
| 64950 | T | . | 64633 |
| 64951 | C | . | 64633 |
| 65172 | C | T | 64854 |
| 65365 | A | G | 65047 |
| 65685 | C | T | 65367 |
| 65777 | G | A | 65459 |
| 65785 | A | C | 65467 |
| 65842 | T | A | 65524 |
| 65884 | C | A | 65566 |
| 65941 | A | . | 65622 |
| 65942 | A | . | 65622 |
| 65943 | T | . | 65622 |
| 65944 | A | . | 65622 |
| 65945 | A | . | 65622 |
| 65986 | G | C | 65663 |
| 66090 | T | . | 65766 |
| 66091 | C | . | 65766 |
| 66092 | T | . | 65766 |
| 66093 | T | . | 65766 |
| 66094 | T | . | 65766 |
| 66138 | T | C | 65810 |
| 66186 | A | G | 65858 |
| 66208 | C | T | 65880 |
| 66210 | A | G | 65882 |
| 66232 | A | T | 65904 |

|       |   |   |       |
|-------|---|---|-------|
| 66242 | T | A | 65914 |
| 66277 | C | A | 65949 |
| 66554 | G | A | 66226 |
| 66570 | G | T | 66242 |
| 67057 | C | A | 66729 |
| 67326 | G | A | 66998 |
| 67369 | G | T | 67041 |
| 67551 | C | A | 67223 |
| 67555 | T | A | 67227 |
| 67587 | T | . | 67258 |
| 67588 | C | . | 67258 |
| 67589 | T | . | 67258 |
| 67590 | T | . | 67258 |
| 67591 | C | . | 67258 |
| 67592 | T | . | 67258 |
| 67593 | T | . | 67258 |
| 67594 | T | . | 67258 |
| 67628 | T | C | 67292 |
| 67648 | G | T | 67312 |
| 67677 | A | T | 67341 |
| 67678 | T | A | 67342 |
| 67691 | A | T | 67355 |
| 67758 | C | T | 67422 |
| 67767 | G | T | 67431 |
| 68026 | G | A | 67690 |
| 68102 | A | G | 67766 |
| 68187 | . | A | 67852 |
| 68187 | . | G | 67853 |
| 68187 | . | A | 67854 |
| 68189 | T | A | 67856 |
| 68233 | C | A | 67900 |
| 68305 | A | T | 67972 |
| 68501 | A | C | 68168 |
| 68544 | G | T | 68211 |
| 68661 | . | T | 68329 |
| 68661 | . | G | 68330 |
| 68766 | A | T | 68435 |
| 68780 | C | . | 68448 |
| 68781 | T | . | 68448 |
| 68782 | G | . | 68448 |
| 68783 | G | . | 68448 |
| 68784 | A | . | 68448 |
| 68810 | T | G | 68474 |
| 69191 | A | C | 68855 |
| 69264 | . | A | 68929 |
| 69264 | . | A | 68930 |
| 69286 | C | A | 68952 |
| 69302 | C | . | 68967 |
| 69303 | G | . | 68967 |
| 69304 | A | . | 68967 |
| 69305 | T | . | 68967 |
| 69306 | T | . | 68967 |
| 69307 | T | . | 68967 |

|       |   |   |       |
|-------|---|---|-------|
| 69308 | T | . | 68967 |
| 69309 | T | . | 68967 |
| 69310 | T | . | 68967 |
| 69311 | A | . | 68967 |
| 69312 | T | . | 68967 |
| 69313 | A | . | 68967 |
| 69314 | T | . | 68967 |
| 69315 | T | . | 68967 |
| 69316 | A | . | 68967 |
| 69317 | A | . | 68967 |
| 69318 | A | . | 68967 |
| 69319 | A | . | 68967 |
| 69320 | A | . | 68967 |
| 69321 | T | . | 68967 |
| 69322 | T | . | 68967 |
| 69323 | G | . | 68967 |
| 69324 | A | . | 68967 |
| 69325 | A | . | 68967 |
| 69326 | C | . | 68967 |
| 69327 | C | . | 68967 |
| 69328 | T | . | 68967 |
| 69386 | A | C | 69025 |
| 69404 | T | G | 69043 |
| 69408 | T | A | 69047 |
| 69443 | T | G | 69082 |
| 69501 | T | A | 69140 |
| 69520 | A | C | 69159 |
| 69589 | G | T | 69228 |
| 69699 | . | A | 69339 |
| 69699 | . | A | 69340 |
| 69699 | . | G | 69341 |
| 69699 | . | G | 69342 |
| 69699 | . | A | 69343 |
| 69699 | . | C | 69344 |
| 69699 | . | A | 69345 |
| 69701 | . | C | 69348 |
| 69701 | . | T | 69349 |
| 69701 | . | T | 69350 |
| 69701 | . | T | 69351 |
| 69701 | . | C | 69352 |
| 69712 | C | A | 69363 |
| 69748 | T | . | 69398 |
| 69880 | C | A | 69530 |
| 69964 | . | G | 69615 |
| 70015 | T | C | 69666 |
| 70258 | G | T | 69909 |
| 70266 | A | C | 69917 |
| 70272 | A | C | 69923 |
| 70291 | T | A | 69942 |
| 70399 | A | G | 70050 |
| 70459 | C | A | 70110 |
| 70460 | C | T | 70111 |
| 70479 | T | G | 70130 |

|       |   |   |       |
|-------|---|---|-------|
| 70645 | G | C | 70296 |
| 70685 | . | C | 70337 |
| 70685 | . | T | 70338 |
| 70685 | . | A | 70339 |
| 70686 | . | G | 70341 |
| 70690 | . | G | 70346 |
| 70730 | T | C | 70386 |
| 70779 | A | C | 70435 |
| 70835 | . | T | 70492 |
| 70835 | . | T | 70493 |
| 70837 | C | A | 70495 |
| 70845 | G | T | 70503 |
| 70931 | T | . | 70588 |
| 70943 | T | G | 70600 |
| 71014 | . | T | 70672 |
| 71028 | C | A | 70686 |
| 71075 | . | A | 70734 |
| 71075 | . | A | 70735 |
| 71098 | A | G | 70758 |
| 71133 | G | T | 70793 |
| 71267 | A | . | 70926 |
| 71268 | G | . | 70926 |
| 71269 | A | . | 70926 |
| 71270 | T | . | 70926 |
| 71298 | G | A | 70954 |
| 71528 | G | T | 71184 |
| 71706 | G | T | 71362 |
| 71733 | C | A | 71389 |
| 71741 | . | A | 71398 |
| 71750 | G | T | 71407 |
| 71828 | A | C | 71485 |
| 72001 | C | A | 71658 |
| 72022 | G | T | 71679 |
| 72079 | A | C | 71736 |
| 72121 | T | G | 71778 |
| 72143 | . | T | 71801 |
| 72215 | T | G | 71873 |
| 72219 | G | T | 71877 |
| 72223 | C | T | 71881 |
| 72329 | A | G | 71987 |
| 72346 | G | A | 72004 |
| 72351 | G | T | 72009 |
| 72494 | . | T | 72153 |
| 72611 | C | T | 72270 |
| 73422 | T | G | 73081 |
| 73665 | C | T | 73324 |
| 73704 | T | A | 73363 |
| 73767 | G | A | 73426 |
| 74316 | . | T | 73976 |
| 74316 | . | A | 73977 |
| 74316 | . | T | 73978 |
| 74316 | . | T | 73979 |
| 74343 | A | C | 74006 |

|       |   |   |       |
|-------|---|---|-------|
| 74579 | A | C | 74242 |
| 74625 | G | A | 74288 |
| 74932 | C | T | 74595 |
| 75015 | T | C | 74678 |
| 75136 | A | C | 74799 |
| 75160 | A | G | 74823 |
| 75219 | A | C | 74882 |
| 75307 | . | T | 74971 |
| 75307 | . | A | 74972 |
| 75307 | . | T | 74973 |
| 75307 | . | C | 74974 |
| 75307 | . | T | 74975 |
| 75451 | A | G | 75119 |
| 75456 | C | A | 75124 |
| 75492 | C | T | 75160 |
| 75525 | G | A | 75193 |
| 75548 | . | T | 75217 |
| 75548 | . | T | 75218 |
| 75548 | . | T | 75219 |
| 75548 | . | T | 75220 |
| 75548 | . | T | 75221 |
| 75548 | . | T | 75222 |
| 75548 | . | T | 75223 |
| 75548 | . | C | 75224 |
| 75548 | . | A | 75225 |
| 75548 | . | T | 75226 |
| 75548 | . | T | 75227 |
| 75548 | . | A | 75228 |
| 75618 | A | C | 75298 |
| 75724 | A | C | 75404 |
| 75914 | . | C | 75595 |
| 75915 | . | A | 75597 |
| 75915 | . | T | 75598 |
| 75915 | . | T | 75599 |
| 75915 | . | A | 75600 |
| 75915 | . | A | 75601 |
| 75915 | . | A | 75602 |
| 75915 | . | T | 75603 |
| 75915 | . | A | 75604 |
| 75978 | G | T | 75667 |
| 75979 | G | T | 75668 |
| 76040 | C | T | 75729 |
| 76624 | A | C | 76313 |
| 76737 | C | A | 76426 |
| 76791 | C | A | 76480 |
| 76818 | C | T | 76507 |
| 76856 | . | T | 76546 |
| 76856 | . | T | 76547 |
| 76981 | C | A | 76672 |
| 77013 | C | A | 76704 |
| 77413 | . | T | 77105 |
| 77436 | G | C | 77128 |
| 77536 | G | T | 77228 |

|       |   |   |       |
|-------|---|---|-------|
| 78016 | A | C | 77708 |
| 78142 | G | T | 77834 |
| 78158 | C | A | 77850 |
| 78160 | G | T | 77852 |
| 78178 | T | G | 77870 |
| 78299 | . | A | 77992 |
| 78323 | C | A | 78016 |
| 78602 | C | A | 78295 |
| 78610 | G | C | 78303 |
| 78614 | C | A | 78307 |
| 78662 | G | A | 78355 |
| 78764 | C | G | 78457 |
| 78837 | C | T | 78530 |
| 78905 | C | A | 78598 |
| 79347 | A | T | 79040 |
| 79387 | T | A | 79080 |
| 79428 | A | C | 79121 |
| 79548 | G | A | 79241 |
| 79704 | C | T | 79397 |
| 79764 | C | A | 79457 |
| 79804 | G | T | 79497 |
| 79815 | A | T | 79508 |
| 79928 | T | G | 79621 |
| 79949 | A | C | 79642 |
| 80011 | G | A | 79704 |
| 80026 | A | C | 79719 |
| 80028 | A | C | 79721 |
| 80087 | A | T | 79780 |
| 80093 | C | G | 79786 |
| 80095 | T | G | 79788 |
| 80332 | G | T | 80025 |
| 80414 | A | G | 80107 |
| 80456 | C | A | 80149 |
| 80475 | C | T | 80168 |
| 80550 | A | C | 80243 |
| 80558 | G | C | 80251 |
| 80565 | . | A | 80259 |
| 80568 | C | T | 80262 |
| 80569 | C | T | 80263 |
| 80636 | G | T | 80330 |
| 80652 | G | T | 80346 |
| 80671 | T | C | 80365 |
| 80696 | . | T | 80391 |
| 80735 | A | G | 80430 |
| 80740 | A | . | 80434 |
| 80741 | T | . | 80434 |
| 80742 | A | . | 80434 |
| 80743 | A | . | 80434 |
| 80744 | A | . | 80434 |
| 80983 | A | C | 80673 |
| 81088 | C | T | 80778 |
| 81173 | T | A | 80863 |
| 81337 | A | C | 81027 |

|       |   |   |       |
|-------|---|---|-------|
| 81561 | . | T | 81252 |
| 81561 | . | G | 81253 |
| 81561 | . | T | 81254 |
| 81561 | . | A | 81255 |
| 81561 | . | T | 81256 |
| 81561 | . | A | 81257 |
| 81561 | . | G | 81258 |
| 81561 | . | A | 81259 |
| 81561 | . | G | 81260 |
| 81561 | . | G | 81261 |
| 81561 | . | T | 81262 |
| 81561 | . | T | 81263 |
| 81561 | . | C | 81264 |
| 81561 | . | T | 81265 |
| 81561 | . | T | 81266 |
| 81561 | . | C | 81267 |
| 81561 | . | T | 81268 |
| 81561 | . | G | 81269 |
| 81561 | . | T | 81270 |
| 81561 | . | A | 81271 |
| 81561 | . | T | 81272 |
| 81561 | . | A | 81273 |
| 81561 | . | G | 81274 |
| 81561 | . | A | 81275 |
| 81561 | . | G | 81276 |
| 81561 | . | G | 81277 |
| 81561 | . | T | 81278 |
| 81561 | . | T | 81279 |
| 81561 | . | C | 81280 |
| 81561 | . | T | 81281 |
| 81561 | . | T | 81282 |
| 81561 | . | C | 81283 |
| 81636 | C | A | 81358 |
| 82090 | T | G | 81812 |
| 82096 | C | A | 81818 |
| 82395 | C | T | 82117 |
| 82797 | A | C | 82519 |
| 83284 | T | . | 83005 |
| 83528 | C | . | 83248 |
| 83529 | G | . | 83248 |
| 83530 | A | . | 83248 |
| 83941 | G | T | 83659 |
| 84593 | A | C | 84311 |
| 84684 | C | T | 84402 |
| 84867 | G | A | 84585 |
| 85206 | T | C | 84924 |
| 86328 | A | C | 86046 |
| 87293 | C | A | 87011 |
| 87634 | C | A | 87352 |
| 87680 | A | C | 87398 |
| 88313 | G | C | 88031 |
| 88691 | A | C | 88409 |
| 89424 | G | A | 89142 |



|        |   |   |        |
|--------|---|---|--------|
| 89553  | A | . | 89270  |
| 89554  | T | . | 89270  |
| 89555  | T | . | 89270  |
| 89556  | G | . | 89270  |
| 89557  | A | . | 89270  |
| 89558  | T | . | 89270  |
| 89559  | G | . | 89270  |
| 89560  | A | . | 89270  |
| 89561  | T | . | 89270  |
| 89562  | A | . | 89270  |
| 89563  | G | . | 89270  |
| 89564  | T | . | 89270  |
| 89565  | G | . | 89270  |
| 89566  | A | . | 89270  |
| 89567  | C | . | 89270  |
| 89568  | G | . | 89270  |
| 89569  | A | . | 89270  |
| 89570  | T | . | 89270  |
| 89668  | C | A | 89368  |
| 89672  | T | C | 89372  |
| 90412  | T | C | 90112  |
| 90481  | G | C | 90181  |
| 91346  | T | C | 91046  |
| 91380  | . | C | 91081  |
| 91581  | . | T | 91283  |
| 91593  | C | . | 91294  |
| 91594  | T | . | 91294  |
| 91595  | G | . | 91294  |
| 91596  | A | . | 91294  |
| 91597  | A | . | 91294  |
| 91669  | T | A | 91366  |
| 91674  | T | G | 91371  |
| 92274  | C | A | 91971  |
| 92399  | A | G | 92096  |
| 93571  | T | G | 93268  |
| 93588  | C | A | 93285  |
| 95679  | T | G | 95376  |
| 96209  | A | G | 95906  |
| 96904  | C | A | 96601  |
| 97695  | C | A | 97392  |
| 98157  | C | T | 97854  |
| 98266  | G | A | 97963  |
| 98272  | G | C | 97969  |
| 100271 | T | C | 99968  |
| 100915 | G | C | 100612 |
| 100922 | T | G | 100619 |
| 100961 | G | T | 100658 |
| 100980 | G | T | 100677 |
| 101156 | G | T | 100853 |
| 103056 | . | A | 102754 |
| 103056 | . | T | 102755 |
| 103056 | . | A | 102756 |
| 105354 | G | A | 105054 |

|        |   |   |        |
|--------|---|---|--------|
| 106238 | G | T | 105938 |
| 106325 | A | C | 106025 |
| 106370 | . | T | 106071 |
| 106453 | T | A | 106154 |
| 106544 | C | A | 106245 |
| 106546 | T | G | 106247 |
| 106929 | A | C | 106630 |
| 107091 | T | G | 106792 |
| 107114 | T | G | 106815 |
| 107725 | C | G | 107429 |
| 107785 | G | C | 107489 |
| 107914 | A | C | 107618 |
| 107925 | T | G | 107629 |
| 107968 | T | G | 107672 |
| 108036 | A | C | 107740 |
| 108070 | T | G | 107774 |
| 108080 | T | A | 107784 |
| 108090 | A | T | 107794 |
| 108091 | A | C | 107795 |
| 108295 | A | G | 107999 |
| 108328 | T | G | 108032 |
| 108361 | C | G | 108065 |
| 108398 | C | T | 108102 |
| 108418 | A | T | 108122 |
| 108423 | T | C | 108127 |
| 108468 | T | G | 108172 |
| 109243 | A | C | 108947 |
| 109602 | G | T | 109306 |
| 109651 | G | A | 109355 |
| 109789 | T | A | 109493 |
| 109901 | A | . | 109604 |
| 109902 | G | . | 109604 |
| 109909 | T | . | 109610 |
| 110040 | G | T | 109741 |
| 110062 | G | T | 109763 |
| 110088 | A | C | 109789 |
| 110144 | C | A | 109845 |
| 110205 | A | T | 109906 |
| 110232 | T | G | 109933 |
| 110281 | A | C | 109982 |
| 110470 | C | A | 110171 |
| 110601 | C | A | 110302 |
| 110604 | T | A | 110305 |
| 110767 | G | A | 110468 |
| 110937 | T | G | 110638 |
| 111064 | A | T | 110765 |
| 111136 | A | C | 110837 |
| 111143 | C | A | 110844 |
| 111637 | G | A | 111338 |
| 111685 | T | A | 111386 |
| 111839 | T | C | 111540 |
| 111849 | A | T | 111550 |
| 111880 | G | T | 111581 |

|        |   |   |        |
|--------|---|---|--------|
| 111881 | A | T | 111582 |
| 111919 | A | C | 111620 |
| 111976 | T | G | 111677 |
| 111986 | G | T | 111687 |
| 112019 | G | T | 111720 |
| 112027 | G | T | 111728 |
| 112042 | . | G | 111744 |
| 112054 | G | C | 111756 |
| 112059 | A | C | 111761 |
| 112072 | C | . | 111773 |
| 112073 | T | . | 111773 |
| 112074 | T | . | 111773 |
| 112075 | T | . | 111773 |
| 112076 | T | . | 111773 |
| 112077 | T | . | 111773 |
| 112078 | C | . | 111773 |
| 112308 | A | G | 112003 |
| 112456 | A | G | 112151 |
| 112794 | C | T | 112489 |
| 112890 | A | T | 112585 |
| 113567 | T | C | 113262 |
| 113606 | G | A | 113301 |
| 113640 | T | G | 113335 |
| 113642 | T | A | 113337 |
| 113643 | T | A | 113338 |
| 113644 | T | A | 113339 |
| 113645 | T | A | 113340 |
| 113646 | T | A | 113341 |
| 113647 | T | A | 113342 |
| 113680 | . | A | 113376 |
| 113698 | C | A | 113394 |
| 114005 | . | C | 113702 |
| 114022 | C | A | 113719 |
| 114031 | A | . | 113727 |
| 114032 | T | . | 113727 |
| 114033 | A | . | 113727 |
| 114034 | T | . | 113727 |
| 114035 | A | . | 113727 |
| 114036 | T | . | 113727 |
| 114037 | A | . | 113727 |
| 114038 | T | . | 113727 |
| 114039 | A | . | 113727 |
| 114040 | T | . | 113727 |
| 114041 | A | . | 113727 |
| 114042 | T | . | 113727 |
| 114113 | A | C | 113798 |
| 114186 | A | C | 113871 |
| 114257 | . | T | 113943 |
| 114648 | T | G | 114334 |
| 114665 | C | A | 114351 |
| 114707 | A | C | 114393 |
| 114788 | A | C | 114474 |
| 115138 | T | C | 114824 |

|        |   |   |        |
|--------|---|---|--------|
| 115267 | G | A | 114953 |
| 115385 | C | G | 115071 |
| 115452 | T | C | 115138 |
| 115503 | . | T | 115190 |
| 115548 | . | A | 115236 |
| 115548 | . | T | 115237 |
| 115554 | G | T | 115243 |
| 115635 | T | C | 115324 |
| 115692 | A | C | 115381 |
| 115803 | C | T | 115492 |
| 115812 | A | T | 115501 |
| 116150 | A | T | 115839 |
| 116266 | T | C | 115955 |
| 116314 | A | C | 116003 |
| 116367 | T | G | 116056 |
| 116831 | C | T | 116520 |
| 116868 | G | T | 116557 |
| 116904 | . | A | 116594 |
| 116904 | . | A | 116595 |
| 116904 | . | A | 116596 |
| 116937 | C | A | 116629 |
| 116977 | A | T | 116669 |
| 116984 | G | T | 116676 |
| 117182 | A | C | 116874 |
| 117223 | T | . | 116914 |
| 117225 | T | A | 116916 |
| 117229 | T | C | 116920 |
| 117250 | . | G | 116942 |
| 117250 | . | A | 116943 |
| 117250 | . | A | 116944 |
| 117250 | . | A | 116945 |
| 117260 | C | A | 116955 |
| 117433 | T | G | 117128 |
| 117505 | T | . | 117199 |
| 117506 | A | . | 117199 |
| 117507 | T | . | 117199 |
| 117508 | A | . | 117199 |
| 117509 | T | . | 117199 |
| 117510 | T | . | 117199 |
| 117511 | A | . | 117199 |
| 117512 | A | . | 117199 |
| 117551 | C | A | 117238 |
| 117568 | A | C | 117255 |
| 117651 | T | G | 117338 |
| 117662 | A | T | 117349 |
| 117684 | G | T | 117371 |
| 117694 | T | G | 117381 |
| 117788 | T | . | 117474 |
| 117789 | G | . | 117474 |
| 117790 | T | . | 117474 |
| 117791 | A | . | 117474 |
| 117798 | C | A | 117481 |
| 117805 | A | G | 117488 |

|        |   |   |        |
|--------|---|---|--------|
| 117916 | T | . | 117598 |
| 117917 | A | . | 117598 |
| 117918 | T | . | 117598 |
| 117919 | T | . | 117598 |
| 117920 | A | . | 117598 |
| 117921 | A | . | 117598 |
| 117922 | A | . | 117598 |
| 117924 | A | C | 117600 |
| 117934 | G | T | 117610 |
| 118294 | T | G | 117970 |
| 118706 | T | C | 118382 |
| 119218 | G | A | 118894 |
| 119678 | T | G | 119354 |
| 119759 | . | A | 119436 |
| 120031 | C | T | 119708 |
| 120066 | G | A | 119743 |
| 120150 | T | G | 119827 |
| 120160 | A | C | 119837 |
| 120175 | G | T | 119852 |
| 120191 | C | A | 119868 |
| 120195 | T | . | 119871 |
| 120229 | T | . | 119904 |
| 120230 | G | . | 119904 |
| 120232 | A | G | 119906 |
| 120235 | C | . | 119908 |
| 120236 | A | . | 119908 |
| 120239 | C | . | 119910 |
| 120240 | C | . | 119910 |
| 120242 | A | G | 119912 |
| 120244 | T | A | 119914 |
| 120249 | T | . | 119918 |
| 120250 | T | G | 119919 |
| 120253 | A | G | 119922 |
| 120255 | T | . | 119923 |
| 120257 | A | . | 119924 |
| 120258 | A | . | 119924 |
| 120260 | C | . | 119925 |
| 120261 | C | . | 119925 |
| 120263 | A | G | 119927 |
| 120267 | A | . | 119930 |
| 120268 | A | G | 119931 |
| 120272 | G | C | 119935 |
| 120276 | G | A | 119939 |
| 120278 | G | A | 119941 |
| 120279 | T | A | 119942 |
| 120281 | T | A | 119944 |
| 120283 | . | T | 119947 |
| 120284 | A | T | 119948 |
| 120286 | G | T | 119950 |
| 120288 | G | T | 119952 |
| 120291 | T | . | 119954 |
| 120293 | G | . | 119955 |
| 120296 | T | A | 119958 |

|        |   |   |        |
|--------|---|---|--------|
| 120297 | G | C | 119959 |
| 120298 | . | T | 119961 |
| 120301 | C | G | 119964 |
| 120303 | T | . | 119965 |
| 120314 | G | T | 119976 |
| 120374 | . | A | 120037 |
| 120374 | . | C | 120038 |
| 120374 | . | C | 120039 |
| 120374 | . | A | 120040 |
| 120374 | . | A | 120041 |
| 120384 | C | A | 120051 |
| 120387 | C | . | 120053 |
| 120581 | T | G | 120247 |
| 120646 | G | T | 120312 |
| 120653 | C | A | 120319 |
| 120698 | T | A | 120364 |
| 120859 | G | T | 120525 |
| 120860 | A | C | 120526 |
| 120890 | G | A | 120556 |
| 120910 | T | A | 120576 |
| 120971 | T | C | 120637 |
| 121016 | C | A | 120682 |
| 121046 | C | T | 120712 |
| 121102 | C | T | 120768 |
| 121109 | A | C | 120775 |
| 121111 | G | T | 120777 |
| 121181 | G | T | 120847 |
| 121183 | T | A | 120849 |
| 121268 | C | T | 120934 |
| 121275 | C | A | 120941 |
| 121311 | C | T | 120977 |
| 121312 | T | G | 120978 |
| 121313 | C | A | 120979 |
| 121373 | T | A | 121039 |
| 121384 | T | A | 121050 |
| 121421 | C | T | 121087 |
| 121492 | T | C | 121158 |
| 121498 | T | C | 121164 |
| 121533 | A | C | 121199 |
| 121550 | T | G | 121216 |
| 121568 | C | A | 121234 |
| 121573 | T | G | 121239 |
| 121603 | T | G | 121269 |
| 121623 | G | T | 121289 |
| 121653 | A | T | 121319 |
| 121676 | T | C | 121342 |
| 121724 | A | G | 121390 |
| 121780 | C | A | 121446 |
| 121822 | A | C | 121488 |
| 121873 | G | T | 121539 |
| 121983 | C | A | 121649 |
| 122057 | A | C | 121723 |
| 122065 | G | C | 121731 |

|        |   |   |        |
|--------|---|---|--------|
| 122083 | T | G | 121749 |
| 122194 | C | A | 121860 |
| 122195 | G | A | 121861 |
| 122207 | T | A | 121873 |
| 122316 | A | G | 121982 |
| 122378 | A | C | 122044 |
| 122398 | . | A | 122065 |
| 122398 | . | A | 122066 |
| 122398 | . | A | 122067 |
| 122398 | . | A | 122068 |
| 122398 | . | G | 122069 |
| 122398 | . | A | 122070 |
| 122448 | T | A | 122120 |
| 122622 | C | T | 122294 |
| 122681 | A | C | 122353 |
| 122740 | G | T | 122412 |
| 122750 | T | G | 122422 |
| 122776 | G | T | 122448 |
| 122787 | G | A | 122459 |
| 122788 | C | T | 122460 |
| 122800 | T | G | 122472 |
| 122807 | T | G | 122479 |
| 122809 | G | T | 122481 |
| 122845 | T | C | 122517 |
| 122858 | G | C | 122530 |
| 122888 | A | T | 122560 |
| 122953 | T | A | 122625 |
| 122957 | G | C | 122629 |
| 122965 | C | A | 122637 |
| 123021 | C | G | 122693 |
| 123057 | T | G | 122729 |
| 123058 | C | A | 122730 |
| 123125 | T | G | 122797 |
| 123160 | T | G | 122832 |
| 123275 | G | A | 122947 |
| 123437 | T | C | 123109 |
| 123501 | T | . | 123172 |
| 123502 | T | . | 123172 |
| 123503 | C | . | 123172 |
| 123504 | T | . | 123172 |
| 123505 | T | . | 123172 |
| 123506 | T | . | 123172 |
| 123534 | A | C | 123200 |
| 123586 | T | G | 123252 |
| 123757 | T | G | 123423 |
| 123761 | A | C | 123427 |
| 123779 | C | A | 123445 |
| 123781 | T | G | 123447 |
| 123852 | G | T | 123518 |
| 123887 | C | T | 123553 |
| 123905 | T | C | 123571 |
| 124004 | T | G | 123670 |
| 124071 | G | T | 123737 |

|        |   |   |        |
|--------|---|---|--------|
| 124095 | T | C | 123761 |
| 124112 | C | T | 123778 |
| 124157 | T | C | 123823 |
| 124187 | C | T | 123853 |
| 124188 | C | A | 123854 |
| 124206 | T | G | 123872 |
| 124267 | T | G | 123933 |
| 124281 | G | C | 123947 |
| 124283 | T | G | 123949 |
| 124310 | C | A | 123976 |
| 124381 | T | G | 124047 |
| 124434 | A | G | 124100 |
| 124472 | C | A | 124138 |
| 124488 | C | A | 124154 |
| 124544 | C | A | 124210 |
| 124556 | G | T | 124222 |
| 124639 | T | C | 124305 |
| 124649 | C | A | 124315 |
| 124823 | T | G | 124489 |
| 124844 | T | C | 124510 |
| 124847 | T | C | 124513 |
| 124941 | A | G | 124607 |
| 124982 | T | A | 124648 |
| 124996 | C | A | 124662 |

---
