# Supplementary material for: De novo assembly of the complete organelle genome sequences of azuki bean (Vigna angularis) using next-generation sequencers
Source: PubMed Central journal article supplement — Breed Sci. 2013 Jun 1;63(2):176–82. doi: 10.1270/jsbbs.63.176 (PMC3688379; doi:10.1270/jsbbs.63.176), 2013-06-01
Supplement: 63_176_5.pdf [file 63_176_5.pdf]

Supplemental Table 5. SNPs and indels between mtDNAs of azuki bean and mungbean

| azuki bean mt position | substitution |   | mungbean mt position |
|------------------------|--------------|---|----------------------|
| 41                     | A            | C | 315100               |
| 279                    | .            | T | 314861               |
| 803                    | C            | A | 314337               |
| 4787                   | C            | A | 196999               |
| 4924                   | G            | T | 197136               |
| 5443                   | T            | G | 197655               |
| 5558                   | T            | G | 197770               |
| 5570                   | C            | A | 197782               |
| 5762                   | A            | C | 197974               |
| 5974                   | T            | G | 198186               |
| 5975                   | C            | A | 198187               |
| 6227                   | .            | A | 198440               |
| 6227                   | .            | T | 198441               |
| 6227                   | .            | G | 198442               |
| 6227                   | .            | G | 198443               |
| 6227                   | .            | G | 198444               |
| 6227                   | .            | A | 198445               |
| 6227                   | .            | T | 198446               |
| 6339                   | T            | G | 198558               |
| 6515                   | A            | C | 198734               |
| 6635                   | C            | A | 198854               |
| 7064                   | .            | C | 199284               |
| 7064                   | .            | T | 199285               |
| 7064                   | .            | G | 199286               |
| 7064                   | .            | A | 199287               |
| 7098                   | T            | G | 199321               |
| 7124                   | C            | A | 199347               |
| 7157                   | C            | A | 199380               |
| 7211                   | G            | T | 199434               |
| 7517                   | C            | A | 205186               |
| 7563                   | C            | A | 205232               |
| 7877                   | T            | . | 205545               |
| 7878                   | C            | . | 205545               |
| 7879                   | A            | . | 205545               |
| 7880                   | A            | . | 205545               |
| 7925                   | T            | G | 205590               |
| 8042                   | T            | G | 205707               |
| 8419                   | T            | G | 206084               |
| 8768                   | C            | A | 206433               |
| 8770                   | T            | G | 206435               |
| 8910                   | A            | C | 206575               |
| 9415                   | T            | G | 207080               |
| 9447                   | T            | G | 207112               |
| 9617                   | G            | T | 207282               |
| 10079                  | T            | G | 207744               |
| 10121                  | C            | A | 207786               |
| 10159                  | C            | A | 207824               |
| 10404                  | C            | A | 208069               |
| 10451                  | T            | G | 208116               |
| 10580                  | G            | T | 208245               |
| 10680                  | C            | A | 208345               |

|       |   |   |        |
|-------|---|---|--------|
| 10794 | A | C | 208459 |
| 10804 | C | A | 208469 |
| 10876 | C | . | 208540 |
| 10877 | G | . | 208540 |
| 10878 | T | . | 208540 |
| 10879 | A | . | 208540 |
| 10880 | A | . | 208540 |
| 10930 | G | T | 208590 |
| 10950 | A | C | 208610 |
| 11086 | A | C | 208746 |
| 11291 | G | T | 208951 |
| 11360 | . | A | 209021 |
| 11360 | . | A | 209022 |
| 11370 | G | T | 209032 |
| 11371 | A | C | 209033 |
| 11489 | T | G | 209151 |
| 11931 | G | T | 209593 |
| 11933 | . | T | 209596 |
| 12192 | G | T | 209855 |
| 12256 | A | C | 209919 |
| 12264 | C | A | 209927 |
| 12725 | . | A | 210389 |
| 12726 | C | T | 210390 |
| 12788 | T | G | 210452 |
| 12945 | T | G | 210609 |
| 12974 | T | G | 210638 |
| 13956 | C | A | 211620 |
| 13962 | C | A | 211626 |
| 13968 | A | C | 211632 |
| 14364 | C | A | 212028 |
| 14404 | C | A | 212068 |
| 14475 | . | A | 212140 |
| 14594 | G | T | 212259 |
| 14702 | T | G | 212367 |
| 14860 | C | A | 212525 |
| 15023 | G | T | 212688 |
| 15028 | G | T | 212693 |
| 15590 | C | A | 213255 |
| 15591 | C | A | 213256 |
| 15784 | G | T | 213449 |
| 15937 | . | G | 213603 |
| 15937 | . | T | 213604 |
| 15937 | . | G | 213605 |
| 15937 | . | A | 213606 |
| 16321 | C | A | 213990 |
| 16717 | G | T | 214386 |
| 16792 | T | G | 214461 |
| 16975 | T | G | 214644 |
| 17346 | A | C | 215015 |
| 17513 | C | A | 215182 |
| 17853 | A | . | 215521 |
| 17854 | T | . | 215521 |
| 17855 | A | . | 215521 |

|       |   |   |        |
|-------|---|---|--------|
| 17856 | A | . | 215521 |
| 17864 | C | A | 215529 |
| 17995 | A | C | 215660 |
| 18042 | G | T | 215707 |
| 18158 | . | A | 215824 |
| 18158 | . | T | 215825 |
| 18160 | G | A | 215827 |
| 18198 | C | A | 215865 |
| 18251 | A | C | 215918 |
| 18373 | A | C | 216040 |
| 18606 | A | C | 216273 |
| 18633 | T | G | 216300 |
| 18735 | C | A | 216402 |
| 18743 | . | A | 216411 |
| 18743 | . | T | 216412 |
| 18743 | . | G | 216413 |
| 18743 | . | A | 216414 |
| 18743 | . | A | 216415 |
| 18783 | C | A | 216455 |
| 18787 | A | C | 216459 |
| 18961 | G | . | 216632 |
| 18962 | A | . | 216632 |
| 18963 | A | . | 216632 |
| 18964 | C | . | 216632 |
| 19021 | C | A | 216689 |
| 19070 | G | T | 216738 |
| 19486 | A | C | 217154 |
| 19499 | A | C | 217167 |
| 19539 | A | C | 217207 |
| 19681 | C | A | 217349 |
| 19696 | T | G | 217364 |
| 19743 | C | A | 217411 |
| 19775 | A | G | 217443 |
| 19789 | C | A | 217457 |
| 19892 | G | T | 217560 |
| 19894 | T | G | 217562 |
| 20193 | T | G | 217861 |
| 20206 | G | T | 217874 |
| 20235 | C | A | 217903 |
| 20288 | A | C | 217956 |
| 20393 | A | C | 218061 |
| 20923 | C | A | 218591 |
| 20935 | C | A | 218603 |
| 21232 | C | A | 218900 |
| 22623 | C | T | 47336  |
| 22639 | A | C | 47352  |
| 22667 | C | A | 47380  |
| 22718 | G | A | 47431  |
| 22781 | C | T | 47494  |
| 22796 | C | T | 47509  |
| 22800 | G | T | 47513  |
| 22805 | T | G | 47518  |
| 23110 | A | C | 47823  |

|       |   |   |        |
|-------|---|---|--------|
| 23204 | A | C | 47917  |
| 23252 | C | A | 47965  |
| 23286 | T | G | 47999  |
| 23317 | A | C | 48030  |
| 25250 | T | G | 330681 |
| 25251 | C | A | 330682 |
| 25259 | T | G | 330690 |
| 25290 | C | T | 330721 |
| 25298 | C | G | 330729 |
| 25307 | G | T | 330738 |
| 25311 | G | T | 330742 |
| 25316 | G | T | 330747 |
| 25354 | C | T | 330785 |
| 25371 | T | G | 330802 |
| 25379 | A | C | 330810 |
| 25392 | . | T | 330824 |
| 25392 | . | G | 330825 |
| 25392 | . | A | 330826 |
| 25407 | A | T | 330841 |
| 25431 | A | C | 330865 |
| 25433 | T | G | 330867 |
| 25442 | T | G | 330876 |
| 25452 | T | C | 330886 |
| 25453 | C | A | 330887 |
| 25477 | C | A | 330911 |
| 25482 | T | G | 330916 |
| 25483 | G | T | 330917 |
| 25523 | T | . | 330956 |
| 25524 | G | . | 330956 |
| 25525 | G | . | 330956 |
| 25526 | A | . | 330956 |
| 25528 | A | C | 330958 |
| 25534 | C | A | 330964 |
| 25570 | A | C | 331000 |
| 25586 | G | T | 331016 |
| 25591 | G | T | 331021 |
| 25603 | G | T | 331033 |
| 25755 | A | C | 47258  |
| 26226 | T | G | 46787  |
| 26317 | C | A | 46696  |
| 26607 | G | T | 46406  |
| 26813 | T | G | 46200  |
| 26819 | C | A | 46194  |
| 26942 | A | C | 46071  |
| 27313 | G | . | 45700  |
| 27314 | T | . | 45700  |
| 27315 | A | . | 45700  |
| 27316 | G | . | 45700  |
| 27317 | T | . | 45700  |
| 27318 | T | . | 45700  |
| 27319 | T | . | 45700  |
| 27320 | T | . | 45700  |
| 27321 | T | . | 45700  |

|       |   |   |        |
|-------|---|---|--------|
| 27328 | T | G | 45694  |
| 27399 | G | . | 45623  |
| 27400 | A | . | 45623  |
| 27401 | A | . | 45623  |
| 27402 | G | . | 45623  |
| 27775 | A | C | 45251  |
| 28066 | C | A | 44960  |
| 28069 | C | A | 44957  |
| 28166 | . | A | 44859  |
| 28752 | T | G | 44273  |
| 28990 | T | G | 44035  |
| 29249 | A | C | 43776  |
| 29404 | G | T | 43621  |
| 29654 | G | A | 43371  |
| 29682 | T | G | 43343  |
| 29683 | C | A | 43342  |
| 30167 | A | C | 42858  |
| 30332 | A | C | 42693  |
| 30347 | C | A | 42678  |
| 30390 | C | A | 42635  |
| 30403 | T | G | 42622  |
| 30497 | T | G | 42528  |
| 30747 | A | C | 42278  |
| 31754 | A | C | 41271  |
| 31812 | G | T | 41213  |
| 31962 | A | C | 41063  |
| 34122 | T | G | 178365 |
| 34132 | A | C | 178375 |
| 34148 | A | G | 178391 |
| 34152 | A | . | 178394 |
| 34153 | G | . | 178394 |
| 34154 | A | . | 178394 |
| 34155 | C | . | 178394 |
| 34237 | T | G | 178476 |
| 34332 | G | T | 178571 |
| 34333 | G | T | 178572 |
| 34341 | G | T | 178580 |
| 34351 | G | T | 178590 |
| 34496 | G | T | 178735 |
| 34502 | C | A | 178741 |
| 34655 | . | A | 178895 |
| 34655 | . | T | 178896 |
| 34655 | . | T | 178897 |
| 34655 | . | A | 178898 |
| 34655 | . | T | 178899 |
| 34658 | G | T | 178902 |
| 34678 | C | T | 178922 |
| 34740 | T | G | 178984 |
| 35043 | G | T | 179287 |
| 35068 | T | G | 179312 |
| 35199 | A | T | 179443 |
| 35200 | G | T | 179444 |
| 35201 | A | T | 179445 |

|       |   |   |        |
|-------|---|---|--------|
| 35202 | A | C | 179446 |
| 35203 | A | T | 179447 |
| 35296 | A | C | 179540 |
| 35333 | G | T | 179577 |
| 35390 | T | G | 179634 |
| 35527 | T | . | 179770 |
| 35528 | T | . | 179770 |
| 35529 | T | . | 179770 |
| 35530 | C | . | 179770 |
| 35531 | A | . | 179770 |
| 35532 | T | . | 179770 |
| 35533 | C | . | 179770 |
| 35534 | C | . | 179770 |
| 35535 | A | . | 179770 |
| 35536 | T | . | 179770 |
| 35537 | C | . | 179770 |
| 35744 | G | T | 179977 |
| 35745 | A | T | 179978 |
| 35746 | A | T | 179979 |
| 36098 | G | T | 180331 |
| 36144 | T | G | 180377 |
| 36489 | C | A | 180722 |
| 36495 | G | A | 180728 |
| 36509 | C | A | 180742 |
| 36687 | G | T | 180920 |
| 36801 | T | G | 181034 |
| 36818 | T | G | 181051 |
| 37056 | T | C | 181289 |
| 37071 | T | G | 181304 |
| 37147 | A | C | 181380 |
| 37256 | G | T | 181489 |
| 37520 | T | G | 181753 |
| 37791 | T | G | 182024 |
| 37826 | G | T | 182059 |
| 37965 | . | T | 182199 |
| 38096 | G | T | 182330 |
| 38397 | T | G | 182631 |
| 38438 | C | A | 182672 |
| 38472 | A | C | 182706 |
| 38619 | T | G | 182853 |
| 38700 | T | G | 182934 |
| 38716 | G | T | 182950 |
| 38720 | G | T | 182954 |
| 38829 | C | A | 183063 |
| 39239 | T | G | 183473 |
| 39240 | C | A | 183474 |
| 39398 | T | G | 183632 |
| 39502 | A | C | 183736 |
| 39554 | G | T | 183788 |
| 39582 | A | C | 183816 |
| 39649 | T | G | 183883 |
| 39745 | C | A | 183979 |
| 39850 | T | G | 184084 |

|       |   |   |        |
|-------|---|---|--------|
| 40078 | T | G | 184312 |
| 40129 | C | A | 184363 |
| 40228 | C | A | 184462 |
| 40290 | G | A | 184524 |
| 40404 | T | G | 184638 |
| 40718 | C | A | 184952 |
| 41129 | A | C | 185363 |
| 41157 | A | C | 185391 |
| 41165 | A | C | 185399 |
| 41169 | C | A | 185403 |
| 41199 | G | T | 185433 |
| 41200 | A | C | 185434 |
| 41423 | G | T | 185657 |
| 41664 | A | C | 185898 |
| 41707 | G | T | 185941 |
| 41709 | T | . | 185942 |
| 41710 | C | . | 185942 |
| 41711 | T | . | 185942 |
| 41712 | G | . | 185942 |
| 41713 | G | . | 185942 |
| 41714 | G | . | 185942 |
| 41715 | C | . | 185942 |
| 41716 | G | . | 185942 |
| 41735 | A | C | 185961 |
| 41810 | A | C | 186036 |
| 41907 | C | A | 186133 |
| 41913 | A | C | 186139 |
| 41988 | A | C | 186214 |
| 41992 | C | A | 186218 |
| 42090 | G | T | 186316 |
| 42282 | T | G | 186508 |
| 42283 | C | A | 186509 |
| 42302 | G | T | 186528 |
| 42303 | A | C | 186529 |
| 42368 | T | G | 186594 |
| 42371 | C | . | 186596 |
| 42372 | G | . | 186596 |
| 42373 | T | . | 186596 |
| 42374 | T | . | 186596 |
| 42412 | C | A | 186634 |
| 42552 | C | A | 186774 |
| 42747 | G | T | 186969 |
| 42874 | . | T | 187097 |
| 42874 | . | G | 187098 |
| 42874 | . | A | 187099 |
| 42874 | . | G | 187100 |
| 42874 | . | G | 187101 |
| 42914 | G | . | 187140 |
| 42915 | A | . | 187140 |
| 42916 | T | . | 187140 |
| 42917 | T | . | 187140 |
| 42918 | T | . | 187140 |
| 42919 | T | . | 187140 |

|       |   |   |        |
|-------|---|---|--------|
| 42920 | G | . | 187140 |
| 43053 | G | T | 187273 |
| 43075 | A | C | 187295 |
| 43335 | G | T | 187555 |
| 43362 | T | G | 187582 |
| 43370 | C | A | 187590 |
| 43383 | T | G | 187603 |
| 43420 | T | G | 187640 |
| 43548 | G | T | 187768 |
| 43727 | A | . | 187946 |
| 43728 | A | . | 187946 |
| 43729 | A | . | 187946 |
| 43730 | G | . | 187946 |
| 43815 | G | T | 188031 |
| 43876 | C | A | 188092 |
| 43947 | C | A | 188163 |
| 44027 | A | C | 188243 |
| 44106 | G | T | 188322 |
| 44739 | T | G | 227848 |
| 44790 | . | C | 227796 |
| 45073 | A | C | 227513 |
| 45203 | T | G | 227383 |
| 45356 | T | G | 227230 |
| 45811 | G | T | 226775 |
| 45888 | A | C | 226698 |
| 46026 | . | A | 226559 |
| 46028 | T | G | 226557 |
| 46507 | C | A | 226078 |
| 46860 | G | T | 225725 |
| 46886 | A | C | 225699 |
| 46903 | A | G | 225682 |
| 47136 | T | G | 225449 |
| 47236 | C | A | 225349 |
| 47247 | T | G | 225338 |
| 47253 | G | T | 225332 |
| 47279 | T | G | 225306 |
| 47480 | G | T | 225105 |
| 47656 | T | . | 224929 |
| 47657 | T | . | 224929 |
| 47658 | C | . | 224929 |
| 47659 | T | . | 224929 |
| 47725 | C | T | 224864 |
| 47752 | . | A | 224832 |
| 47752 | . | G | 224833 |
| 47752 | . | A | 224834 |
| 47752 | . | T | 224835 |
| 47752 | . | A | 224836 |
| 48001 | C | A | 224583 |
| 48082 | C | A | 224502 |
| 48194 | A | C | 224390 |
| 48336 | A | C | 224248 |
| 48599 | G | T | 223985 |
| 48830 | C | A | 223754 |



|       |   |   |        |
|-------|---|---|--------|
| 48951 | C | G | 223633 |
| 49183 | G | T | 223401 |
| 49189 | A | C | 223395 |
| 49345 | T | G | 223239 |
| 49346 | C | A | 223238 |
| 49347 | T | G | 223237 |
| 49823 | G | T | 222761 |
| 50093 | T | G | 222491 |
| 50138 | T | G | 222446 |
| 50163 | T | G | 222421 |
| 50209 | A | G | 222375 |
| 50325 | C | T | 222259 |
| 50665 | G | T | 48355  |
| 50762 | T | G | 48452  |
| 50830 | G | T | 48520  |
| 50946 | C | A | 48636  |
| 51539 | G | T | 49229  |
| 51597 | G | T | 49287  |
| 51643 | A | C | 49333  |
| 52081 | A | C | 49771  |
| 52333 | G | T | 50023  |
| 52481 | G | T | 50171  |
| 52617 | G | T | 50307  |
| 52837 | T | G | 50527  |
| 52850 | G | T | 50540  |
| 52934 | T | G | 50624  |
| 53133 | C | A | 50678  |
| 53368 | A | C | 50913  |
| 53400 | G | T | 50945  |
| 54033 | A | C | 51578  |
| 54271 | G | T | 51816  |
| 54306 | T | G | 51851  |
| 54664 | A | C | 52209  |
| 55017 | A | C | 52562  |
| 55023 | G | T | 52568  |
| 55063 | C | A | 52608  |
| 55413 | A | C | 52958  |
| 55678 | A | C | 53223  |
| 55737 | G | T | 53282  |
| 56011 | G | T | 53556  |
| 56177 | T | G | 53722  |
| 56178 | C | A | 53723  |
| 56572 | G | T | 54117  |
| 56601 | C | A | 54146  |
| 56626 | G | T | 54171  |
| 57104 | C | A | 54649  |
| 57570 | A | C | 55115  |
| 57667 | C | A | 55212  |
| 58090 | T | G | 55635  |
| 58283 | A | C | 55828  |
| 58481 | C | A | 56026  |
| 58497 | G | T | 56042  |
| 58600 | C | A | 56145  |

|       |   |   |       |
|-------|---|---|-------|
| 58661 | T | G | 56206 |
| 58749 | A | C | 56294 |
| 58792 | . | G | 56338 |
| 58792 | . | C | 56339 |
| 58792 | . | A | 56340 |
| 58792 | . | C | 56341 |
| 59004 | A | C | 56553 |
| 59220 | T | G | 56769 |
| 59221 | C | A | 56770 |
| 59341 | . | G | 56891 |
| 59341 | . | A | 56892 |
| 59341 | . | A | 56893 |
| 59341 | . | T | 56894 |
| 59639 | . | C | 57193 |
| 59639 | . | C | 57194 |
| 59639 | . | G | 57195 |
| 59639 | . | C | 57196 |
| 59687 | . | A | 57245 |
| 59687 | . | A | 57246 |
| 59687 | . | A | 57247 |
| 59687 | . | G | 57248 |
| 59740 | T | G | 57301 |
| 60299 | T | G | 57860 |
| 60426 | C | A | 57987 |
| 60594 | A | C | 58155 |
| 60620 | G | T | 58181 |
| 60629 | A | C | 58190 |
| 60747 | A | C | 58308 |
| 60754 | C | A | 58315 |
| 60838 | T | G | 58399 |
| 60864 | G | T | 58425 |
| 60982 | G | T | 58543 |
| 61019 | . | T | 58581 |
| 61091 | T | G | 58653 |
| 61656 | C | A | 59218 |
| 62167 | . | A | 59730 |
| 62580 | A | C | 60143 |
| 62884 | G | T | 60447 |
| 62907 | C | A | 60470 |
| 62961 | A | C | 60524 |
| 63109 | T | G | 60672 |
| 63163 | T | G | 60726 |
| 63169 | . | T | 60733 |
| 63169 | . | T | 60734 |
| 63219 | G | T | 60784 |
| 63390 | T | G | 60955 |
| 63665 | G | T | 61230 |
| 63963 | A | C | 61528 |
| 64068 | T | G | 61633 |
| 64254 | G | T | 61819 |
| 64293 | A | C | 61858 |
| 64934 | T | G | 62499 |
| 65313 | G | T | 62878 |

|       |   |   |        |
|-------|---|---|--------|
| 65994 | G | T | 63559  |
| 66436 | T | G | 64001  |
| 66441 | . | T | 64007  |
| 66550 | G | T | 64116  |
| 67664 | C | T | 65230  |
| 68002 | . | A | 65569  |
| 68423 | G | T | 65990  |
| 68424 | A | C | 65991  |
| 68506 | A | . | 66072  |
| 68507 | A | . | 66072  |
| 68508 | A | . | 66072  |
| 68509 | C | . | 66072  |
| 68510 | A | . | 66072  |
| 68511 | A | . | 66072  |
| 68512 | C | . | 66072  |
| 68513 | G | . | 66072  |
| 68526 | C | . | 66084  |
| 68527 | T | . | 66084  |
| 68528 | G | . | 66084  |
| 68529 | A | . | 66084  |
| 68530 | G | . | 66084  |
| 68541 | G | T | 66095  |
| 68541 | G | T | 348630 |
| 68570 | G | T | 66124  |
| 68570 | G | T | 348601 |
| 68793 | C | A | 66347  |
| 69236 | G | T | 66790  |
| 69457 | T | G | 67011  |
| 69528 | T | G | 67082  |
| 69567 | T | G | 67121  |
| 69850 | G | T | 67404  |
| 70094 | C | A | 67648  |
| 70201 | G | T | 67755  |
| 70211 | C | A | 67765  |
| 70245 | G | T | 67799  |
| 70379 | A | C | 67933  |
| 70705 | C | A | 68259  |
| 70841 | T | G | 68395  |
| 70847 | A | C | 68401  |
| 70924 | C | A | 68478  |
| 71090 | C | A | 68644  |
| 71225 | C | A | 68779  |
| 71237 | A | C | 68791  |
| 71609 | T | G | 69163  |
| 72312 | C | A | 69866  |
| 72323 | G | T | 69877  |
| 72461 | C | A | 70015  |
| 72761 | C | A | 70315  |
| 72802 | T | G | 70356  |
| 72942 | C | A | 70496  |
| 72949 | G | T | 70503  |
| 73059 | T | . | 70612  |
| 73060 | T | . | 70612  |

|       |   |   |       |
|-------|---|---|-------|
| 73061 | T | . | 70612 |
| 73062 | T | . | 70612 |
| 73063 | A | . | 70612 |
| 73064 | T | . | 70612 |
| 73240 | C | A | 70788 |
| 73478 | C | A | 71026 |
| 73636 | T | G | 71184 |
| 73744 | T | G | 71292 |
| 73784 | A | C | 71332 |
| 73925 | C | A | 71473 |
| 74155 | T | G | 71703 |
| 74238 | T | G | 71786 |
| 74239 | C | A | 71787 |
| 74631 | T | G | 72179 |
| 74893 | G | T | 72441 |
| 74911 | G | T | 72459 |
| 75294 | T | G | 72842 |
| 75313 | C | A | 72861 |
| 75351 | G | T | 72899 |
| 75366 | C | A | 72914 |
| 75564 | G | T | 73112 |
| 75813 | T | G | 73361 |
| 76178 | G | T | 73726 |
| 76452 | T | G | 74000 |
| 76516 | A | C | 74064 |
| 76553 | A | C | 74101 |
| 76686 | . | T | 74235 |
| 76976 | G | T | 74525 |
| 77122 | G | T | 74671 |
| 77252 | G | T | 74801 |
| 77278 | G | T | 74827 |
| 77311 | A | C | 74860 |
| 77706 | T | G | 75255 |
| 77912 | G | T | 75461 |
| 77927 | G | T | 75476 |
| 78026 | C | A | 75575 |
| 78380 | T | G | 75929 |
| 78389 | A | C | 75938 |
| 78410 | A | C | 75959 |
| 78437 | C | A | 75986 |
| 78789 | A | C | 76338 |
| 78941 | C | A | 76490 |
| 79442 | T | G | 76991 |
| 79547 | C | A | 77096 |
| 79620 | C | . | 77168 |
| 79621 | T | . | 77168 |
| 79622 | T | . | 77168 |
| 79623 | A | . | 77168 |
| 79934 | C | A | 77479 |
| 80011 | G | T | 77556 |
| 80188 | A | C | 77733 |
| 80230 | G | T | 77775 |
| 80616 | T | G | 78161 |

|       |   |   |       |
|-------|---|---|-------|
| 80649 | . | G | 78195 |
| 80649 | . | A | 78196 |
| 80649 | . | A | 78197 |
| 80649 | . | G | 78198 |
| 80649 | . | G | 78199 |
| 80783 | C | A | 78333 |
| 80791 | A | C | 78341 |
| 81061 | C | A | 78611 |
| 81656 | C | A | 79206 |
| 81737 | T | G | 79287 |
| 81751 | T | G | 79301 |
| 81823 | C | A | 79373 |
| 82213 | T | G | 79763 |
| 82257 | A | C | 79807 |
| 82292 | G | . | 79841 |
| 82293 | A | . | 79841 |
| 82294 | C | . | 79841 |
| 82295 | T | . | 79841 |
| 82296 | T | . | 79841 |
| 82297 | T | . | 79841 |
| 82298 | C | . | 79841 |
| 82299 | T | . | 79841 |
| 82312 | A | C | 79854 |
| 82400 | T | G | 79942 |
| 82492 | G | T | 80034 |
| 82493 | A | C | 80035 |
| 82540 | A | C | 80082 |
| 82827 | G | T | 80369 |
| 82990 | A | C | 80532 |
| 83142 | G | T | 80684 |
| 83189 | T | G | 80731 |
| 83394 | A | C | 80936 |
| 83764 | A | C | 81306 |
| 83825 | A | C | 81367 |
| 83887 | T | G | 81429 |
| 83980 | C | A | 81522 |
| 83982 | T | G | 81524 |
| 84161 | . | A | 81704 |
| 84275 | G | T | 81818 |
| 84408 | T | G | 81951 |
| 84547 | T | G | 82090 |
| 84573 | C | A | 82116 |
| 84583 | A | C | 82126 |
| 84608 | T | G | 82151 |
| 85012 | G | T | 82555 |
| 85013 | A | C | 82556 |
| 85201 | G | T | 82744 |
| 85658 | A | C | 83201 |
| 85710 | T | G | 83253 |
| 85762 | A | C | 83305 |
| 85793 | . | A | 83337 |
| 85793 | . | A | 83338 |
| 85878 | . | T | 83424 |

|       |   |   |       |
|-------|---|---|-------|
| 85878 | . | T | 83425 |
| 85957 | C | A | 83504 |
| 85970 | G | . | 83516 |
| 85971 | A | . | 83516 |
| 85972 | A | . | 83516 |
| 85973 | A | . | 83516 |
| 85979 | T | G | 83522 |
| 86088 | G | . | 83630 |
| 86089 | A | . | 83630 |
| 86090 | T | . | 83630 |
| 86091 | C | . | 83630 |
| 86251 | T | G | 83790 |
| 86502 | T | G | 84041 |
| 87459 | . | G | 84999 |
| 87460 | T | A | 85000 |
| 87586 | T | G | 85126 |
| 87865 | A | C | 85405 |
| 87869 | C | A | 85409 |
| 89405 | G | T | 86945 |
| 90432 | C | A | 87972 |
| 90550 | A | C | 88090 |
| 90593 | A | C | 88133 |
| 90647 | A | C | 88187 |
| 91544 | G | T | 89084 |
| 91553 | G | T | 89093 |
| 91962 | C | A | 89502 |
| 91969 | T | G | 89509 |
| 91991 | G | T | 89531 |
| 92114 | . | G | 89655 |
| 92691 | . | T | 90233 |
| 92736 | G | T | 90278 |
| 92745 | A | . | 90286 |
| 92746 | A | . | 90286 |
| 92747 | T | . | 90286 |
| 92748 | C | . | 90286 |
| 93010 | G | T | 90548 |
| 93203 | . | C | 90742 |
| 93346 | C | A | 90885 |
| 93386 | . | T | 90926 |
| 93664 | T | C | 91204 |
| 93724 | C | A | 91264 |
| 94295 | C | A | 91835 |
| 94304 | A | C | 91844 |
| 94309 | G | T | 91849 |
| 94406 | A | C | 91946 |
| 94478 | G | T | 92018 |
| 94758 | . | C | 92299 |
| 94758 | . | G | 92300 |
| 94758 | . | C | 92301 |
| 94758 | . | C | 92302 |
| 95320 | C | A | 92864 |
| 95361 | T | G | 92905 |
| 95377 | A | C | 92921 |

|        |   |   |       |
|--------|---|---|-------|
| 95413  | G | T | 92957 |
| 95504  | G | T | 93048 |
| 95895  | . | C | 93440 |
| 95895  | . | G | 93441 |
| 95895  | . | C | 93442 |
| 95895  | . | C | 93443 |
| 95943  | A | C | 93491 |
| 96498  | A | C | 94046 |
| 97331  | G | . | 94878 |
| 97332  | A | . | 94878 |
| 97333  | A | . | 94878 |
| 97334  | A | . | 94878 |
| 97436  | G | T | 94980 |
| 97470  | T | G | 95014 |
| 97471  | C | A | 95015 |
| 97532  | C | A | 95076 |
| 97600  | C | A | 95144 |
| 97601  | T | G | 95145 |
| 97605  | T | G | 95149 |
| 97619  | A | C | 95163 |
| 97806  | T | G | 95350 |
| 97980  | T | G | 95524 |
| 98163  | C | A | 95707 |
| 98508  | . | T | 96053 |
| 98662  | G | T | 96207 |
| 98734  | G | T | 96279 |
| 98742  | C | A | 96287 |
| 98944  | A | C | 96489 |
| 100115 | G | T | 97660 |
| 100177 | A | C | 97722 |
| 100298 | T | G | 97843 |
| 100367 | A | C | 97912 |
| 100422 | . | C | 97968 |
| 100557 | C | A | 98103 |
| 100591 | G | T | 98137 |
| 101292 | A | C | 98838 |
| 101506 | C | A | 99052 |
| 101508 | A | C | 99054 |
| 101547 | G | T | 99093 |
| 101620 | . | A | 99167 |
| 101704 | C | A | 99251 |
| 101720 | T | . | 99266 |
| 101721 | G | . | 99266 |
| 101722 | C | . | 99266 |
| 101723 | C | . | 99266 |
| 101724 | T | . | 99266 |
| 101725 | A | . | 99266 |
| 101726 | A | . | 99266 |
| 101727 | T | . | 99266 |
| 101728 | A | . | 99266 |
| 101729 | A | . | 99266 |
| 101730 | A | . | 99266 |
| 101731 | G | . | 99266 |

|        |   |   |        |
|--------|---|---|--------|
| 101732 | T | . | 99266  |
| 101735 | C | . | 99268  |
| 101736 | C | . | 99268  |
| 101737 | A | . | 99268  |
| 101741 | A | . | 99271  |
| 101742 | T | . | 99271  |
| 101743 | C | . | 99271  |
| 101744 | A | . | 99271  |
| 101745 | T | . | 99271  |
| 101746 | C | . | 99271  |
| 101749 | T | . | 99273  |
| 101750 | T | . | 99273  |
| 102591 | C | A | 100114 |
| 102826 | C | A | 100349 |
| 102940 | C | . | 100462 |
| 102941 | G | . | 100462 |
| 102942 | A | . | 100462 |
| 102943 | T | . | 100462 |
| 102975 | . | A | 100495 |
| 103010 | A | C | 100530 |
| 103012 | A | C | 100532 |
| 103230 | G | T | 100750 |
| 103269 | C | A | 100789 |
| 103277 | G | T | 100797 |
| 103349 | G | T | 100869 |
| 103350 | A | C | 100870 |
| 103422 | C | A | 100942 |
| 103443 | A | C | 100963 |
| 103515 | T | G | 101035 |
| 103577 | A | C | 101097 |
| 103588 | T | G | 101108 |
| 103784 | C | A | 101304 |
| 104003 | A | C | 101523 |
| 104461 | A | C | 101981 |
| 104625 | G | T | 102145 |
| 104785 | C | A | 102305 |
| 104845 | G | T | 102365 |
| 104869 | G | T | 102389 |
| 105079 | C | T | 102599 |
| 105175 | C | A | 102695 |
| 105426 | C | A | 102946 |
| 105856 | C | A | 103376 |
| 105904 | T | G | 103424 |
| 105910 | C | A | 103430 |
| 106038 | G | T | 103558 |
| 106687 | C | A | 104207 |
| 106699 | T | G | 104219 |
| 106743 | A | C | 104263 |
| 106846 | T | G | 104366 |
| 106946 | G | T | 104466 |
| 107078 | T | G | 104598 |
| 107084 | A | C | 104604 |
| 107145 | A | C | 104665 |



|        |   |   |        |
|--------|---|---|--------|
| 107216 | T | G | 104736 |
| 107393 | C | A | 104913 |
| 108440 | T | G | 105960 |
| 108451 | G | T | 105971 |
| 108526 | C | A | 106046 |
| 108591 | G | T | 106111 |
| 108632 | G | T | 106152 |
| 109098 | G | T | 106618 |
| 109099 | A | C | 106619 |
| 109461 | C | A | 106981 |
| 109475 | C | A | 106995 |
| 109512 | C | A | 107032 |
| 109731 | G | T | 107251 |
| 109732 | A | C | 107252 |
| 109816 | G | T | 107336 |
| 110385 | C | A | 107905 |
| 110424 | A | C | 107944 |
| 110819 | T | G | 108339 |
| 110960 | A | C | 108480 |
| 111669 | C | A | 109189 |
| 111820 | C | A | 109340 |
| 111949 | T | . | 109468 |
| 111950 | G | . | 109468 |
| 111951 | C | . | 109468 |
| 111952 | G | . | 109468 |
| 112078 | A | C | 109594 |
| 112199 | A | C | 109715 |
| 112307 | G | . | 109822 |
| 112308 | T | . | 109822 |
| 112309 | T | . | 109822 |
| 112310 | G | . | 109822 |
| 112311 | C | . | 109822 |
| 112312 | T | . | 109822 |
| 112313 | T | . | 109822 |
| 112314 | G | . | 109822 |
| 112315 | T | . | 109822 |
| 112316 | T | . | 109822 |
| 112429 | G | T | 109935 |
| 112451 | G | T | 109957 |
| 112493 | A | C | 109999 |
| 112610 | G | T | 110116 |
| 112693 | G | T | 110199 |
| 112702 | A | C | 110208 |
| 112775 | T | G | 110281 |
| 112779 | G | T | 110285 |
| 112854 | C | T | 110360 |
| 113211 | T | G | 110717 |
| 113291 | . | T | 110798 |
| 113419 | G | T | 110926 |
| 113516 | G | T | 111023 |
| 113540 | T | G | 111047 |
| 114106 | G | T | 111613 |
| 114107 | A | C | 111614 |

|        |   |   |        |
|--------|---|---|--------|
| 114658 | C | A | 112165 |
| 115125 | G | T | 112632 |
| 115338 | T | G | 112845 |
| 116019 | . | A | 113527 |
| 116433 | A | C | 113941 |
| 116706 | G | T | 114214 |
| 116981 | G | T | 114489 |
| 117091 | . | T | 114600 |
| 117098 | T | G | 114607 |
| 117171 | T | G | 114680 |
| 117308 | C | A | 114817 |
| 117382 | . | C | 114892 |
| 117382 | . | T | 114893 |
| 117382 | . | T | 114894 |
| 117382 | . | T | 114895 |
| 117500 | T | G | 115013 |
| 118461 | C | A | 115974 |
| 118514 | C | A | 116027 |
| 118539 | G | T | 116052 |
| 118732 | T | G | 116245 |
| 120201 | G | T | 117714 |
| 120248 | A | . | 117760 |
| 120249 | T | . | 117760 |
| 120250 | C | . | 117760 |
| 120251 | A | . | 117760 |
| 120321 | C | A | 117830 |
| 120325 | T | G | 117834 |
| 120775 | . | A | 118285 |
| 120775 | . | A | 118286 |
| 120775 | . | T | 118287 |
| 120775 | . | T | 118288 |
| 120775 | . | C | 118289 |
| 121169 | . | A | 118684 |
| 121208 | C | A | 118723 |
| 121249 | C | T | 118764 |
| 121305 | . | T | 118821 |
| 121305 | . | T | 118822 |
| 121305 | . | T | 118823 |
| 121305 | . | T | 118824 |
| 121305 | . | T | 118825 |
| 121305 | . | C | 118826 |
| 121305 | . | C | 118827 |
| 121305 | . | T | 118828 |
| 121305 | . | T | 118829 |
| 121309 | . | T | 118834 |
| 121309 | . | T | 118835 |
| 121309 | . | T | 118836 |
| 121309 | . | T | 118837 |
| 121309 | . | G | 118838 |
| 121309 | . | T | 118839 |
| 121315 | T | G | 118845 |
| 121371 | G | T | 118901 |
| 121379 | T | G | 118909 |

|        |   |   |        |
|--------|---|---|--------|
| 121382 | T | G | 118912 |
| 121395 | T | G | 118925 |
| 122019 | C | . | 119548 |
| 122020 | T | . | 119548 |
| 122021 | T | . | 119548 |
| 122022 | C | . | 119548 |
| 122082 | A | C | 119608 |
| 122128 | C | T | 119654 |
| 122291 | T | G | 119817 |
| 122546 | T | G | 120072 |
| 122677 | . | A | 120204 |
| 122677 | . | G | 120205 |
| 122677 | . | C | 120206 |
| 122797 | . | A | 120327 |
| 122797 | . | T | 120328 |
| 122797 | . | A | 120329 |
| 122797 | . | T | 120330 |
| 122799 | . | C | 120333 |
| 122799 | A | C | 331072 |
| 122865 | C | . | 120398 |
| 122865 | C | . | 331137 |
| 122866 | A | . | 120398 |
| 122866 | A | . | 331137 |
| 122867 | T | . | 120398 |
| 122867 | T | . | 331137 |
| 122868 | C | . | 120398 |
| 122868 | C | . | 331137 |
| 122922 | . | T | 120453 |
| 122922 | . | C | 120454 |
| 122922 | . | A | 120455 |
| 122922 | . | A | 120456 |
| 122922 | . | T | 120457 |
| 122922 | . | T | 331192 |
| 122922 | . | C | 331193 |
| 122922 | . | A | 331194 |
| 122922 | . | A | 331195 |
| 122922 | . | T | 331196 |
| 122977 | C | A | 120512 |
| 123044 | A | C | 120579 |
| 123186 | C | A | 120721 |
| 123420 | C | . | 120954 |
| 123421 | G | . | 120954 |
| 123422 | A | . | 120954 |
| 123423 | T | . | 120954 |
| 123424 | T | . | 120954 |
| 123425 | G | . | 120954 |
| 123426 | A | . | 120954 |
| 123427 | A | . | 120954 |
| 123428 | T | . | 120954 |
| 123429 | C | . | 120954 |
| 123430 | T | . | 120954 |
| 123431 | A | . | 120954 |
| 123432 | T | . | 120954 |

|        |   |   |        |
|--------|---|---|--------|
| 123433 | T | . | 120954 |
| 123434 | C | . | 120954 |
| 123447 | G | T | 120967 |
| 123451 | C | . | 120970 |
| 123452 | A | . | 120970 |
| 123453 | C | . | 120970 |
| 123454 | A | . | 120970 |
| 123455 | A | . | 120970 |
| 123456 | A | . | 120970 |
| 123457 | A | . | 120970 |
| 123458 | G | . | 120970 |
| 123551 | A | C | 121063 |
| 123578 | T | G | 121090 |
| 123987 | C | A | 121499 |
| 124460 | C | A | 121972 |
| 125222 | G | T | 122734 |
| 125405 | T | G | 122917 |
| 125448 | G | . | 122959 |
| 125449 | G | . | 122959 |
| 125450 | A | . | 122959 |
| 125451 | T | . | 122959 |
| 125452 | C | . | 122959 |
| 125453 | A | . | 122959 |
| 125454 | G | . | 122959 |
| 125455 | T | . | 122959 |
| 125456 | C | . | 122959 |
| 125457 | C | . | 122959 |
| 125458 | T | . | 122959 |
| 125459 | C | . | 122959 |
| 125460 | C | . | 122959 |
| 125461 | T | . | 122959 |
| 125462 | T | . | 122959 |
| 125463 | G | . | 122959 |
| 125473 | G | T | 122969 |
| 125479 | A | C | 122975 |
| 125495 | T | G | 122991 |
| 125501 | C | T | 122997 |
| 125516 | A | G | 123012 |
| 125558 | T | G | 123054 |
| 125561 | G | . | 123056 |
| 125562 | C | . | 123056 |
| 125563 | A | . | 123056 |
| 125564 | G | . | 123056 |
| 126770 | G | T | 124262 |
| 126939 | C | G | 124431 |
| 126940 | C | G | 124432 |
| 126952 | C | T | 124444 |
| 126954 | T | G | 124446 |
| 126958 | T | G | 124450 |
| 126962 | C | T | 124454 |
| 126996 | G | A | 124488 |
| 127023 | A | G | 124515 |
| 127024 | T | G | 124516 |

|        |   |   |        |
|--------|---|---|--------|
| 127033 | A | C | 124525 |
| 127050 | G | A | 124542 |
| 127051 | A | G | 124543 |
| 127053 | A | G | 124545 |
| 127054 | C | T | 124546 |
| 127057 | A | C | 124549 |
| 127232 | C | A | 124724 |
| 128532 | C | A | 126024 |
| 128607 | G | T | 126099 |
| 128673 | A | C | 126165 |
| 128915 | C | A | 126407 |
| 129076 | G | T | 126568 |
| 129142 | . | A | 126635 |
| 129549 | C | A | 127042 |
| 129675 | T | G | 127168 |
| 129677 | C | A | 127170 |
| 129679 | A | G | 127172 |
| 129737 | G | A | 127230 |
| 129772 | T | G | 127265 |
| 129825 | . | T | 127319 |
| 129825 | . | C | 127320 |
| 129825 | . | C | 127321 |
| 129827 | . | G | 127324 |
| 129837 | C | . | 127333 |
| 129838 | T | . | 127333 |
| 129839 | G | . | 127333 |
| 129840 | T | . | 127333 |
| 129848 | G | T | 127341 |
| 130673 | A | C | 128166 |
| 130760 | C | A | 128253 |
| 130810 | A | C | 128303 |
| 131013 | C | A | 128506 |
| 131139 | T | C | 128632 |
| 131418 | A | C | 128911 |
| 132290 | C | A | 129783 |
| 132349 | G | T | 129842 |
| 132350 | A | C | 129843 |
| 132397 | G | T | 129890 |
| 132604 | T | G | 130097 |
| 133297 | T | G | 130790 |
| 133531 | T | G | 131024 |
| 133538 | A | C | 131031 |
| 133543 | G | T | 131036 |
| 133701 | T | G | 131194 |
| 133813 | . | A | 131307 |
| 133813 | . | T | 131308 |
| 133813 | . | C | 131309 |
| 133815 | G | A | 131311 |
| 133816 | . | C | 131313 |
| 134097 | G | T | 131594 |
| 134216 | G | T | 131713 |
| 134506 | A | C | 132003 |
| 134644 | T | G | 132141 |

|        |   |   |        |
|--------|---|---|--------|
| 134740 | G | T | 132237 |
| 134744 | C | A | 132241 |
| 135027 | T | C | 132524 |
| 135038 | A | C | 132535 |
| 135107 | G | T | 132604 |
| 136085 | C | A | 133582 |
| 136116 | C | A | 133613 |
| 136336 | G | T | 133833 |
| 136351 | T | G | 133848 |
| 136688 | A | C | 134185 |
| 136697 | . | A | 134195 |
| 137422 | . | T | 134921 |
| 137550 | A | C | 135049 |
| 137655 | G | T | 135154 |
| 137665 | T | G | 135164 |
| 137914 | G | T | 135413 |
| 138406 | A | C | 135905 |
| 138435 | A | C | 135934 |
| 138769 | G | T | 136268 |
| 139015 | T | G | 136514 |
| 139170 | A | C | 136669 |
| 139512 | C | T | 166455 |
| 139578 | G | T | 166389 |
| 139632 | G | . | 166335 |
| 139633 | C | . | 166335 |
| 139634 | C | . | 166335 |
| 139635 | C | . | 166335 |
| 139636 | C | . | 166335 |
| 139637 | A | . | 166335 |
| 139761 | C | A | 166212 |
| 139972 | . | T | 165993 |
| 139972 | . | T | 165994 |
| 139972 | . | C | 165995 |
| 139972 | . | T | 165996 |
| 139972 | . | T | 165997 |
| 139972 | . | T | 165998 |
| 139972 | . | C | 165999 |
| 139972 | . | T | 166000 |
| 139974 | A | C | 165991 |
| 140046 | T | G | 165919 |
| 140058 | G | T | 165907 |
| 140103 | A | C | 165862 |
| 140637 | A | C | 165328 |
| 140728 | T | G | 165237 |
| 140973 | C | A | 164992 |
| 140995 | T | G | 164970 |
| 141058 | C | A | 164907 |
| 141089 | C | A | 164876 |
| 141344 | T | G | 164621 |
| 141380 | A | C | 164585 |
| 141554 | . | A | 164410 |
| 141810 | A | C | 164154 |
| 142087 | G | T | 163877 |

|        |   |   |        |
|--------|---|---|--------|
| 142169 | A | C | 163795 |
| 142170 | G | T | 163794 |
| 142432 | G | . | 163532 |
| 142433 | C | A | 163532 |
| 142435 | C | A | 163530 |
| 142436 | . | T | 163528 |
| 142441 | A | C | 163523 |
| 142463 | T | G | 163501 |
| 143015 | G | . | 162949 |
| 143017 | C | . | 162948 |
| 143018 | A | . | 162948 |
| 143019 | G | . | 162948 |
| 143342 | A | C | 162626 |
| 143379 | T | G | 162589 |
| 143486 | T | G | 162482 |
| 143556 | A | C | 162412 |
| 143637 | A | C | 162331 |
| 143998 | C | A | 161970 |
| 144029 | C | A | 161939 |
| 144045 | C | G | 161923 |
| 144046 | T | A | 161922 |
| 144048 | C | T | 161920 |
| 144052 | A | C | 161916 |
| 144053 | A | C | 161915 |
| 144054 | G | C | 161914 |
| 144056 | C | G | 161912 |
| 144058 | G | C | 161910 |
| 144059 | T | A | 161909 |
| 144063 | T | . | 161905 |
| 144064 | G | . | 161905 |
| 144065 | A | C | 161905 |
| 144067 | G | . | 161903 |
| 144068 | G | . | 161903 |
| 144069 | A | . | 161903 |
| 144250 | T | G | 161723 |
| 144445 | G | T | 161528 |
| 144913 | G | T | 161060 |
| 145059 | A | C | 160914 |
| 145066 | G | T | 160907 |
| 145088 | G | T | 160885 |
| 145191 | . | T | 160781 |
| 145203 | T | G | 160769 |
| 145586 | C | A | 160386 |
| 145594 | T | G | 160378 |
| 145602 | T | C | 160370 |
| 146071 | A | C | 159901 |
| 146136 | G | T | 159836 |
| 146231 | G | T | 159741 |
| 146490 | A | . | 159482 |
| 146491 | A | . | 159482 |
| 146492 | C | . | 159482 |
| 146493 | A | . | 159482 |
| 146494 | A | . | 159482 |

|        |   |   |        |
|--------|---|---|--------|
| 146495 | C | . | 159482 |
| 146496 | A | . | 159482 |
| 146497 | G | . | 159482 |
| 146513 | T | G | 111614 |
| 146513 | T | G | 159467 |
| 146514 | C | A | 111613 |
| 146514 | C | A | 159466 |
| 146707 | A | C | 286355 |
| 147293 | T | . | 194237 |
| 147294 | T | . | 194237 |
| 147295 | A | . | 194237 |
| 147296 | T | . | 194237 |
| 147297 | T | . | 194237 |
| 147312 | . | T | 194214 |
| 147312 | . | T | 194215 |
| 147312 | . | C | 194216 |
| 147312 | . | A | 194217 |
| 147312 | . | A | 194218 |
| 147312 | . | A | 194219 |
| 147312 | . | T | 194220 |
| 147312 | . | A | 194221 |
| 147312 | . | G | 194222 |
| 147581 | C | A | 193945 |
| 148472 | G | T | 193054 |
| 149308 | T | G | 192218 |
| 149311 | G | T | 192215 |
| 149399 | A | C | 192127 |
| 149407 | A | . | 192119 |
| 149408 | T | . | 192119 |
| 149409 | A | . | 192119 |
| 149410 | T | . | 192119 |
| 149413 | A | C | 192117 |
| 149628 | . | T | 191896 |
| 149628 | . | A | 191897 |
| 149628 | . | T | 191898 |
| 149628 | . | A | 191899 |
| 149628 | . | A | 191900 |
| 149628 | . | A | 191901 |
| 149632 | . | T | 191890 |
| 149632 | . | A | 191891 |
| 150229 | T | G | 191293 |
| 150372 | A | . | 191150 |
| 150373 | A | . | 191150 |
| 150376 | T | A | 191148 |
| 150377 | A | G | 191147 |
| 150418 | G | T | 191106 |
| 150842 | G | T | 190682 |
| 150879 | G | T | 190645 |
| 151002 | A | C | 190522 |
| 151071 | G | T | 190453 |
| 151365 | G | T | 190159 |
| 151771 | G | T | 189753 |
| 152192 | T | G | 189332 |



|        |   |   |        |
|--------|---|---|--------|
| 152193 | C | A | 189331 |
| 152326 | C | A | 189198 |
| 152353 | G | T | 189171 |
| 158329 | C | A | 222066 |
| 158582 | C | A | 372210 |
| 158684 | A | C | 372312 |
| 158711 | G | . | 372338 |
| 158712 | T | . | 372338 |
| 158713 | G | . | 372338 |
| 158714 | A | . | 372338 |
| 158715 | T | . | 372338 |
| 158723 | C | A | 372346 |
| 158724 | T | G | 372347 |
| 158974 | G | T | 372597 |
| 159198 | A | C | 372821 |
| 159291 | C | A | 372914 |
| 159431 | T | G | 373054 |
| 159496 | C | A | 373119 |
| 159507 | C | A | 373130 |
| 159627 | G | T | 373250 |
| 159635 | G | T | 373258 |
| 159636 | T | G | 373259 |
| 159718 | T | G | 373341 |
| 160854 | G | T | 374477 |
| 161508 | C | A | 375131 |
| 161892 | A | C | 375515 |
| 161940 | T | G | 375563 |
| 162025 | C | A | 375648 |
| 162068 | C | A | 375691 |
| 162148 | T | G | 375771 |
| 162324 | C | A | 375947 |
| 162379 | G | T | 376002 |
| 162419 | A | C | 376042 |
| 162740 | C | A | 376363 |
| 162790 | T | G | 376413 |
| 163082 | C | A | 376705 |
| 163096 | A | C | 376719 |
| 163098 | C | A | 376721 |
| 163725 | A | C | 377348 |
| 164169 | C | A | 377792 |
| 164175 | A | C | 377798 |
| 164497 | G | . | 204504 |
| 164498 | A | . | 204504 |
| 164499 | G | . | 204504 |
| 164500 | A | . | 204504 |
| 164501 | A | . | 204504 |
| 164502 | G | . | 204504 |
| 164503 | T | . | 204504 |
| 164504 | C | . | 204504 |
| 164505 | C | . | 204504 |
| 164715 | T | G | 204714 |
| 164932 | C | A | 380577 |
| 164975 | C | A | 380620 |

|        |   |   |        |
|--------|---|---|--------|
| 164983 | C | A | 380628 |
| 165284 | T | . | 380928 |
| 165285 | T | . | 380928 |
| 165286 | G | . | 380928 |
| 165287 | G | . | 380928 |
| 165288 | C | . | 380928 |
| 165289 | T | . | 380928 |
| 165290 | T | . | 380928 |
| 165291 | A | . | 380928 |
| 165292 | G | . | 380928 |
| 165293 | A | . | 380928 |
| 165294 | T | . | 380928 |
| 165295 | T | . | 380928 |
| 165296 | C | . | 380928 |
| 165297 | A | . | 380928 |
| 165298 | A | . | 380928 |
| 165423 | G | . | 381052 |
| 165424 | G | . | 381052 |
| 165425 | A | . | 381052 |
| 165426 | A | . | 381052 |
| 165725 | C | A | 381351 |
| 165774 | A | C | 381400 |
| 169755 | . | T | 161768 |
| 169778 | A | G | 161791 |
| 170099 | C | A | 336963 |
| 170100 | C | A | 336962 |
| 170402 | C | A | 336660 |
| 170550 | T | G | 336512 |
| 170604 | . | T | 336457 |
| 170878 | A | C | 336183 |
| 171424 | C | A | 335637 |
| 174534 | . | C | 331725 |
| 174534 | . | G | 331726 |
| 174534 | . | A | 331727 |
| 174730 | C | A | 331529 |
| 174755 | G | T | 331504 |
| 174758 | A | . | 331501 |
| 174761 | C | . | 331499 |
| 174762 | T | . | 331499 |
| 174763 | T | . | 331499 |
| 174764 | T | . | 331499 |
| 174765 | T | . | 331499 |
| 174766 | T | . | 331499 |
| 174768 | T | . | 331498 |
| 174769 | T | . | 331498 |
| 174772 | A | . | 331496 |
| 174773 | C | . | 331496 |
| 174803 | C | A | 331467 |
| 174858 | A | C | 331412 |
| 174959 | . | G | 331310 |
| 175028 | T | G | 331241 |
| 175073 | . | A | 120452 |
| 175073 | . | A | 120453 |

|        |   |   |        |
|--------|---|---|--------|
| 175073 | . | G | 120454 |
| 175073 | . | T | 120455 |
| 175073 | . | T | 120456 |
| 175073 | . | A | 331191 |
| 175073 | . | A | 331192 |
| 175073 | . | G | 331193 |
| 175073 | . | T | 331194 |
| 175073 | . | T | 331195 |
| 175129 | T | . | 120396 |
| 175129 | T | . | 331135 |
| 175130 | G | . | 120396 |
| 175130 | G | . | 331135 |
| 175131 | G | . | 120396 |
| 175131 | G | . | 331135 |
| 175132 | A | . | 120396 |
| 175132 | A | . | 331135 |
| 175195 | . | A | 120330 |
| 175195 | . | T | 120331 |
| 175195 | . | T | 120332 |
| 175195 | . | G | 120333 |
| 175195 | . | A | 333384 |
| 175195 | . | T | 333385 |
| 175195 | . | T | 333386 |
| 175195 | . | G | 333387 |
| 175196 | . | A | 120328 |
| 175196 | T | G | 331072 |
| 175196 | . | A | 333382 |
| 175208 | G | . | 120316 |
| 175208 | G | . | 333370 |
| 175232 | C | A | 120293 |
| 176280 | A | C | 332299 |
| 176608 | A | C | 331971 |
| 176699 | G | T | 331880 |
| 176718 | A | C | 331861 |
| 178245 | A | C | 330470 |
| 178278 | A | C | 330437 |
| 178287 | G | T | 330428 |
| 178608 | C | A | 330107 |
| 178701 | . | A | 330013 |
| 178861 | C | A | 329853 |
| 178928 | A | C | 329786 |
| 178954 | A | C | 329760 |
| 179005 | A | C | 329709 |
| 179009 | G | T | 329705 |
| 179166 | C | A | 329548 |
| 179231 | G | T | 329483 |
| 179378 | T | G | 329336 |
| 179420 | G | T | 329294 |
| 179431 | C | A | 329283 |
| 179462 | C | A | 329252 |
| 179556 | A | C | 329158 |
| 179908 | G | T | 328806 |
| 179951 | C | A | 328763 |

|        |   |   |        |
|--------|---|---|--------|
| 180163 | A | C | 328551 |
| 180198 | A | C | 328516 |
| 180210 | T | G | 328504 |
| 180215 | A | C | 328499 |
| 180611 | . | T | 328099 |
| 180611 | . | T | 328100 |
| 180611 | . | T | 328101 |
| 180611 | . | C | 328102 |
| 180878 | . | G | 327831 |
| 180923 | A | C | 327786 |
| 181018 | G | T | 327691 |
| 181043 | T | G | 327666 |
| 181072 | T | G | 327637 |
| 181077 | G | T | 327632 |
| 181081 | G | T | 327628 |
| 181084 | C | A | 327625 |
| 181425 | A | C | 327284 |
| 182465 | T | G | 326244 |
| 182727 | G | T | 325982 |
| 182864 | C | A | 325845 |
| 183123 | A | C | 325586 |
| 183427 | A | C | 325282 |
| 183578 | A | C | 325131 |
| 183709 | A | C | 325000 |
| 184639 | G | T | 324070 |
| 184842 | T | G | 323867 |
| 184974 | C | A | 323735 |
| 185036 | C | A | 323673 |
| 185045 | T | G | 323664 |
| 185325 | T | G | 323384 |
| 185357 | G | T | 323352 |
| 185666 | A | C | 323043 |
| 185716 | A | C | 322993 |
| 185740 | T | G | 322969 |
| 185757 | T | G | 322952 |
| 186269 | G | T | 322440 |
| 186323 | T | G | 322386 |
| 186447 | A | C | 322262 |
| 186453 | C | A | 322256 |
| 186521 | C | A | 322188 |
| 186601 | C | A | 322108 |
| 188028 | C | A | 320681 |
| 188065 | A | C | 320644 |
| 188164 | T | . | 320545 |
| 188165 | T | . | 320545 |
| 188166 | T | . | 320545 |
| 188167 | C | . | 320545 |
| 188174 | A | C | 320539 |
| 188228 | C | A | 320485 |
| 188278 | C | A | 320435 |
| 188289 | A | C | 320424 |
| 188329 | C | A | 320384 |
| 188331 | T | G | 320382 |

|        |   |   |        |
|--------|---|---|--------|
| 188338 | C | A | 320375 |
| 188373 | T | G | 320340 |
| 188764 | C | A | 319949 |
| 189569 | G | T | 319144 |
| 190050 | T | G | 318663 |
| 190131 | G | T | 318582 |
| 190513 | G | T | 318200 |
| 190778 | G | T | 317935 |
| 190813 | C | A | 317900 |
| 190997 | A | C | 317716 |
| 191046 | C | A | 317667 |
| 191142 | C | A | 317571 |
| 191618 | A | C | 317095 |
| 191643 | A | C | 317070 |
| 191838 | T | G | 316875 |
| 191943 | G | T | 316770 |
| 192100 | T | G | 316613 |
| 192429 | G | T | 316284 |
| 192474 | G | T | 316239 |
| 192487 | A | C | 316226 |
| 192501 | T | A | 316212 |
| 192515 | G | T | 316198 |
| 192555 | G | T | 316158 |
| 192595 | C | A | 316118 |
| 192774 | G | T | 315939 |
| 192829 | G | T | 315884 |
| 192830 | A | C | 315883 |
| 192837 | C | A | 315876 |
| 193051 | G | T | 315662 |
| 193244 | G | T | 315469 |
| 193275 | C | A | 315438 |
| 193295 | G | T | 315418 |
| 193340 | C | A | 315373 |
| 193353 | G | T | 315360 |
| 193441 | C | A | 315272 |
| 193569 | C | A | 315144 |
| 193613 | A | C | 315100 |
| 193753 | . | T | 314959 |
| 193843 | . | T | 314868 |
| 194374 | C | A | 314337 |
| 194708 | G | T | 314003 |
| 194892 | T | G | 313819 |
| 194937 | G | T | 313774 |
| 196393 | C | A | 312318 |
| 196561 | T | G | 312150 |
| 197016 | T | G | 311695 |
| 197211 | C | A | 311500 |
| 197328 | T | G | 311383 |
| 197329 | C | A | 311382 |
| 197704 | A | C | 311007 |
| 197708 | G | T | 311003 |
| 197878 | A | C | 310833 |
| 197964 | A | . | 310747 |

|        |   |   |        |
|--------|---|---|--------|
| 197965 | A | . | 310747 |
| 197966 | C | . | 310747 |
| 197967 | A | . | 310747 |
| 197968 | T | . | 310747 |
| 198274 | T | . | 310442 |
| 198275 | T | . | 310442 |
| 198276 | G | . | 310442 |
| 198277 | C | . | 310442 |
| 198343 | A | C | 310377 |
| 198453 | T | G | 310267 |
| 198461 | G | T | 310259 |
| 198481 | A | . | 282197 |
| 198695 | G | T | 310025 |
| 198716 | T | G | 310004 |
| 198856 | T | G | 309864 |
| 199049 | T | G | 309671 |
| 199056 | C | A | 309664 |
| 199528 | G | T | 309192 |
| 199542 | C | A | 309178 |
| 199687 | T | G | 309033 |
| 200039 | C | A | 308681 |
| 200191 | A | . | 308529 |
| 200192 | A | . | 308529 |
| 200193 | A | . | 308529 |
| 200194 | G | . | 308529 |
| 200614 | C | A | 308110 |
| 200632 | G | T | 308092 |
| 200860 | T | G | 307864 |
| 200883 | G | T | 307841 |
| 201055 | A | C | 307669 |
| 201113 | A | C | 307611 |
| 201216 | G | T | 307508 |
| 201401 | G | T | 307323 |
| 201872 | G | T | 306852 |
| 201933 | G | T | 306791 |
| 202191 | C | A | 306533 |
| 202225 | T | G | 306499 |
| 202470 | C | A | 306254 |
| 202650 | C | A | 306074 |
| 202873 | T | G | 305851 |
| 203036 | T | G | 305688 |
| 203293 | C | A | 305431 |
| 203380 | A | C | 305344 |
| 203451 | A | C | 305273 |
| 203457 | C | A | 305267 |
| 204077 | . | T | 304646 |
| 204268 | C | A | 304455 |
| 204565 | T | G | 304158 |
| 204621 | A | C | 304102 |
| 204743 | G | T | 303980 |
| 204744 | A | C | 303979 |
| 204749 | C | A | 303974 |
| 204936 | . | T | 303786 |

|        |   |   |        |
|--------|---|---|--------|
| 205331 | A | C | 303391 |
| 205350 | . | A | 303367 |
| 205350 | . | A | 303368 |
| 205350 | . | A | 303369 |
| 205350 | . | G | 303370 |
| 205350 | . | A | 303371 |
| 205352 | T | G | 303365 |
| 205364 | C | A | 303353 |
| 205731 | C | A | 302986 |
| 205973 | G | T | 302744 |
| 205982 | A | C | 302735 |
| 206009 | G | T | 302708 |
| 206038 | G | T | 302679 |
| 206196 | A | C | 302521 |
| 206214 | G | T | 302503 |
| 206217 | T | G | 302500 |
| 206243 | T | G | 302474 |
| 206346 | G | T | 302371 |
| 206387 | . | G | 302329 |
| 206878 | G | T | 301838 |
| 206945 | C | A | 301771 |
| 207300 | A | C | 301416 |
| 207404 | A | . | 301312 |
| 207405 | G | . | 301312 |
| 207406 | T | . | 301312 |
| 207407 | T | . | 301312 |
| 207408 | G | . | 301312 |
| 207409 | A | . | 301312 |
| 207649 | T | G | 301073 |
| 207713 | C | A | 301009 |
| 208497 | . | C | 300224 |
| 208843 | A | C | 299878 |
| 208978 | C | A | 299743 |
| 209050 | T | G | 299671 |
| 209077 | . | A | 299643 |
| 209122 | A | C | 299598 |
| 209124 | C | A | 299596 |
| 209188 | C | A | 299532 |
| 209307 | G | . | 299413 |
| 209308 | A | . | 299413 |
| 209309 | A | . | 299413 |
| 209310 | A | . | 299413 |
| 209311 | G | . | 299413 |
| 209312 | G | . | 299413 |
| 209313 | A | . | 299413 |
| 209314 | A | . | 299413 |
| 209361 | T | G | 299367 |
| 209370 | T | G | 299358 |
| 209583 | A | C | 299145 |
| 209618 | A | C | 299110 |
| 209788 | A | C | 298940 |
| 209870 | C | A | 298858 |
| 210249 | A | C | 298479 |

|        |   |   |        |
|--------|---|---|--------|
| 210253 | T | G | 298475 |
| 210467 | A | C | 298261 |
| 210591 | C | A | 298137 |
| 210620 | C | A | 298108 |
| 210631 | C | . | 298097 |
| 210632 | T | . | 298097 |
| 210633 | C | . | 298097 |
| 210634 | A | . | 298097 |
| 210635 | G | . | 298097 |
| 210648 | C | . | 298085 |
| 210649 | G | . | 298085 |
| 210650 | T | . | 298085 |
| 210651 | T | . | 298085 |
| 210652 | G | . | 298085 |
| 210653 | T | . | 298085 |
| 210654 | T | . | 298085 |
| 210655 | T | . | 298085 |
| 210748 | C | A | 297993 |
| 210792 | C | A | 297949 |
| 210805 | A | C | 297936 |
| 210822 | G | T | 297919 |
| 210978 | C | A | 297763 |
| 211031 | G | T | 297710 |
| 211287 | . | T | 297452 |
| 211287 | . | T | 297453 |
| 211289 | C | A | 297450 |
| 211295 | T | G | 297444 |
| 211506 | C | A | 297233 |
| 211573 | G | T | 297166 |
| 212038 | C | A | 296701 |
| 212145 | A | C | 296594 |
| 212261 | G | T | 296478 |
| 212310 | A | C | 296429 |
| 212373 | G | . | 296366 |
| 212374 | A | . | 296366 |
| 212375 | A | . | 296366 |
| 212376 | A | . | 296366 |
| 212377 | A | . | 296366 |
| 212476 | A | C | 296268 |
| 212482 | G | T | 296262 |
| 212531 | G | A | 296213 |
| 212775 | T | G | 295969 |
| 212841 | G | T | 295903 |
| 213072 | . | T | 295671 |
| 213455 | A | C | 394950 |
| 213679 | A | C | 232170 |
| 213789 | A | C | 395284 |
| 213933 | T | G | 395428 |
| 213982 | G | T | 395477 |
| 213987 | G | T | 395482 |
| 213989 | . | T | 395485 |
| 213989 | . | A | 395486 |
| 213989 | . | A | 395487 |



|        |   |   |        |
|--------|---|---|--------|
| 213989 | . | G | 395488 |
| 214023 | A | C | 395522 |
| 214102 | C | A | 395601 |
| 214462 | C | A | 395961 |
| 214511 | G | T | 396010 |
| 214517 | G | T | 396016 |
| 214632 | A | C | 396131 |
| 215220 | T | G | 396719 |
| 215346 | G | T | 396845 |
| 215408 | T | G | 396907 |
| 215409 | C | A | 396908 |
| 215472 | G | T | 396971 |
| 215473 | A | C | 396972 |
| 215500 | A | C | 396999 |
| 215514 | T | C | 397013 |
| 215718 | C | A | 397217 |
| 215722 | A | C | 397221 |
| 215839 | G | T | 397338 |
| 215841 | T | G | 397340 |
| 215968 | A | C | 397467 |
| 215980 | G | T | 397479 |
| 216210 | G | T | 397709 |
| 216211 | A | C | 397710 |
| 216227 | T | G | 397726 |
| 217044 | A | C | 398543 |
| 217205 | C | A | 398704 |
| 217261 | C | A | 398760 |
| 217585 | G | T | 399084 |
| 217641 | G | T | 399140 |
| 217705 | G | T | 399204 |
| 217708 | G | T | 399207 |
| 217714 | A | C | 399213 |
| 217726 | C | A | 399225 |
| 217729 | T | G | 399228 |
| 217943 | G | T | 399442 |
| 217969 | A | C | 399468 |
| 218011 | C | A | 399510 |
| 218392 | G | T | 399891 |
| 218393 | A | C | 399892 |
| 218550 | C | A | 400049 |
| 218633 | T | G | 400132 |
| 218634 | C | A | 400133 |
| 218673 | A | C | 400172 |
| 218757 | C | A | 400256 |
| 218926 | C | A | 400425 |
| 219295 | C | A | 400794 |
| 219298 | T | G | 400797 |
| 219300 | C | A | 400799 |
| 219324 | C | A | 400823 |
| 219335 | C | . | 400833 |
| 219336 | T | . | 400833 |
| 219337 | C | . | 400833 |
| 219338 | A | . | 400833 |

|        |   |   |        |
|--------|---|---|--------|
| 219339 | G | . | 400833 |
| 219352 | C | . | 400845 |
| 219353 | G | . | 400845 |
| 219354 | T | . | 400845 |
| 219355 | T | . | 400845 |
| 219356 | G | . | 400845 |
| 219357 | T | . | 400845 |
| 219358 | T | . | 400845 |
| 219359 | T | . | 400845 |
| 219621 | T | G | 401107 |
| 219627 | A | C | 401113 |
| 220169 | A | C | 393    |
| 221252 | A | T | 1476   |
| 221366 | T | G | 1590   |
| 221455 | C | A | 1679   |
| 221975 | C | . | 2198   |
| 222002 | G | T | 2225   |
| 222162 | G | T | 2385   |
| 222194 | T | G | 2417   |
| 222793 | C | A | 3016   |
| 223061 | T | G | 3284   |
| 223298 | G | T | 3521   |
| 223342 | A | C | 3565   |
| 223598 | C | A | 3821   |
| 224108 | T | G | 4331   |
| 224216 | C | A | 4439   |
| 224818 | C | A | 5041   |
| 225127 | . | A | 5351   |
| 225168 | A | C | 5392   |
| 225245 | C | A | 5469   |
| 226042 | C | A | 6266   |
| 226504 | G | T | 6728   |
| 226532 | A | C | 6756   |
| 226797 | C | A | 7021   |
| 226802 | T | G | 7026   |
| 226896 | . | T | 7121   |
| 226966 | G | T | 7191   |
| 226975 | G | T | 7200   |
| 226983 | A | T | 7208   |
| 227171 | A | C | 7396   |
| 227277 | A | . | 7501   |
| 227278 | A | . | 7501   |
| 227279 | C | . | 7501   |
| 227280 | G | . | 7501   |
| 227566 | C | G | 7787   |
| 227625 | A | C | 7846   |
| 227728 | C | A | 7949   |
| 227964 | C | A | 8185   |
| 228033 | C | A | 8254   |
| 228087 | A | C | 8308   |
| 228246 | A | C | 8467   |
| 228520 | G | T | 8741   |
| 228535 | G | T | 8756   |

|        |   |   |       |
|--------|---|---|-------|
| 228678 | T | G | 8899  |
| 229126 | . | A | 9348  |
| 229181 | G | T | 9403  |
| 229359 | C | A | 9581  |
| 229404 | A | C | 9626  |
| 229562 | A | G | 9784  |
| 229611 | T | G | 9833  |
| 229684 | . | T | 9907  |
| 229726 | G | T | 9949  |
| 229727 | G | T | 9950  |
| 229739 | T | . | 9961  |
| 229740 | T | . | 9961  |
| 229746 | C | A | 9967  |
| 229901 | A | C | 10122 |
| 230261 | . | A | 10483 |
| 230473 | C | A | 10695 |
| 230896 | A | C | 11118 |
| 230906 | C | A | 11128 |
| 231019 | A | C | 11241 |
| 231020 | G | T | 11242 |
| 231228 | C | A | 11450 |
| 231349 | T | G | 11571 |
| 231374 | T | G | 11596 |
| 231378 | T | G | 11600 |
| 231522 | C | A | 11744 |
| 231559 | T | G | 11781 |
| 231593 | T | G | 11815 |
| 231711 | A | . | 11932 |
| 231712 | T | . | 11932 |
| 231713 | A | . | 11932 |
| 231714 | A | . | 11932 |
| 231715 | G | . | 11932 |
| 231776 | G | T | 11993 |
| 231814 | T | G | 12031 |
| 231923 | C | A | 12140 |
| 232034 | A | . | 12250 |
| 232035 | A | . | 12250 |
| 232036 | T | . | 12250 |
| 232037 | G | . | 12250 |
| 232038 | T | . | 12250 |
| 232039 | T | . | 12250 |
| 232040 | A | . | 12250 |
| 232087 | G | T | 12297 |
| 232184 | T | G | 12394 |
| 232316 | . | A | 12527 |
| 232415 | G | T | 12626 |
| 232526 | A | C | 12737 |
| 232608 | G | T | 12819 |
| 232716 | A | C | 12927 |
| 232748 | G | T | 12959 |
| 232845 | T | G | 13056 |
| 232899 | C | A | 13110 |
| 233026 | C | A | 13237 |

|        |   |   |       |
|--------|---|---|-------|
| 233136 | C | A | 13347 |
| 233170 | C | A | 13381 |
| 233348 | C | A | 13559 |
| 233388 | A | C | 13599 |
| 233434 | C | A | 13645 |
| 233664 | A | C | 13875 |
| 233680 | G | T | 13891 |
| 233691 | G | T | 13902 |
| 233756 | A | C | 13967 |
| 234011 | G | T | 14222 |
| 234132 | G | T | 14343 |
| 234460 | A | C | 14671 |
| 234878 | A | C | 15089 |
| 235080 | G | T | 15291 |
| 235116 | A | C | 15327 |
| 235275 | C | A | 15486 |
| 235348 | T | . | 15558 |
| 235349 | C | . | 15558 |
| 235350 | T | . | 15558 |
| 235351 | T | . | 15558 |
| 235354 | A | C | 15561 |
| 235387 | T | G | 15594 |
| 235841 | C | A | 16048 |
| 235901 | G | T | 16108 |
| 235965 | C | A | 16172 |
| 236155 | . | T | 16363 |
| 236243 | T | G | 16451 |
| 236249 | G | T | 16457 |
| 236329 | T | G | 16537 |
| 236439 | A | C | 16647 |
| 236445 | A | C | 16653 |
| 236514 | . | C | 16723 |
| 236523 | . | T | 16733 |
| 237006 | G | T | 17216 |
| 237217 | C | A | 17427 |
| 237229 | G | T | 17439 |
| 237259 | A | C | 17469 |
| 237632 | G | T | 17842 |
| 237885 | C | A | 18095 |
| 238115 | A | C | 18325 |
| 238120 | C | A | 18330 |
| 238151 | G | T | 18361 |
| 238498 | A | C | 18708 |
| 238873 | A | C | 19083 |
| 238925 | G | T | 19135 |
| 238936 | C | A | 19146 |
| 239361 | T | G | 19571 |
| 239623 | C | A | 19833 |
| 239700 | T | G | 19910 |
| 239913 | G | T | 20123 |
| 240220 | C | A | 20430 |
| 240251 | T | C | 20461 |
| 240359 | A | C | 20569 |

|        |   |   |       |
|--------|---|---|-------|
| 240409 | T | G | 20619 |
| 240747 | C | A | 20957 |
| 240748 | T | G | 20958 |
| 240799 | T | G | 21009 |
| 240852 | C | . | 21061 |
| 240853 | T | . | 21061 |
| 240854 | T | . | 21061 |
| 240855 | C | . | 21061 |
| 241015 | C | A | 21221 |
| 241791 | G | T | 21997 |
| 241875 | T | G | 22081 |
| 242765 | A | C | 22971 |
| 243259 | G | T | 23465 |
| 243528 | G | T | 23734 |
| 243580 | T | G | 23786 |
| 244087 | G | T | 24293 |
| 244281 | G | T | 24487 |
| 244745 | G | T | 24951 |
| 244757 | A | . | 24962 |
| 244758 | C | . | 24962 |
| 244759 | C | . | 24962 |
| 244760 | T | . | 24962 |
| 244761 | T | . | 24962 |
| 244762 | C | . | 24962 |
| 244763 | C | . | 24962 |
| 244764 | C | . | 24962 |
| 244765 | T | . | 24962 |
| 244766 | T | . | 24962 |
| 245009 | A | C | 25205 |
| 245122 | C | A | 25318 |
| 245716 | T | G | 25912 |
| 245967 | G | T | 26163 |
| 246037 | T | G | 26233 |
| 246056 | A | C | 26252 |
| 246076 | G | T | 26272 |
| 246114 | G | T | 26310 |
| 246442 | G | T | 26638 |
| 246523 | G | T | 26719 |
| 246709 | G | T | 26905 |
| 246920 | A | C | 27116 |
| 247126 | G | T | 27322 |
| 247933 | A | C | 28129 |
| 247936 | A | C | 28132 |
| 248075 | G | T | 28271 |
| 248076 | A | C | 28272 |
| 248665 | . | T | 28862 |
| 248763 | G | T | 28960 |
| 249022 | C | A | 29219 |
| 249092 | T | G | 29289 |
| 249100 | T | G | 29297 |
| 249232 | . | T | 29430 |
| 249714 | T | G | 29912 |
| 249715 | C | A | 29913 |

|        |   |   |        |
|--------|---|---|--------|
| 250317 | A | C | 30515  |
| 250345 | C | . | 30542  |
| 250346 | A | . | 30542  |
| 250347 | A | . | 30542  |
| 250348 | A | . | 30542  |
| 250349 | G | . | 30542  |
| 250500 | T | G | 157064 |
| 250592 | A | C | 156972 |
| 250924 | T | G | 156640 |
| 251095 | G | T | 156469 |
| 251405 | G | T | 156159 |
| 251406 | T | G | 156158 |
| 251416 | G | T | 156148 |
| 251694 | A | C | 155870 |
| 251807 | . | G | 155753 |
| 251807 | . | C | 155754 |
| 251807 | . | C | 155755 |
| 251807 | . | G | 155756 |
| 251922 | G | T | 155638 |
| 252064 | C | A | 155496 |
| 252457 | G | T | 155103 |
| 252508 | G | T | 155052 |
| 252531 | C | A | 155029 |
| 252736 | G | T | 154824 |
| 252895 | . | T | 154664 |
| 252904 | . | G | 154653 |
| 252904 | . | A | 154654 |
| 252958 | C | A | 154599 |
| 253017 | G | T | 154540 |
| 253027 | T | G | 154530 |
| 253037 | G | . | 154520 |
| 253038 | T | . | 154520 |
| 253039 | C | . | 154520 |
| 253040 | G | . | 154520 |
| 253041 | T | . | 154520 |
| 253042 | G | . | 154520 |
| 253043 | G | . | 154520 |
| 253044 | T | . | 154520 |
| 253045 | T | . | 154520 |
| 253208 | A | C | 154358 |
| 253260 | . | G | 154305 |
| 253261 | T | G | 154304 |
| 253262 | T | C | 154303 |
| 253263 | T | A | 154302 |
| 253512 | T | G | 154053 |
| 253549 | C | A | 154016 |
| 253596 | A | C | 153969 |
| 253608 | G | T | 153957 |
| 253640 | T | G | 153925 |
| 253662 | T | G | 153903 |
| 253722 | C | A | 153843 |
| 254335 | A | C | 153230 |
| 254544 | A | C | 153021 |

|        |   |   |        |
|--------|---|---|--------|
| 254581 | T | G | 152984 |
| 254639 | A | . | 152926 |
| 254640 | A | . | 152926 |
| 254641 | A | . | 152926 |
| 254642 | C | . | 152926 |
| 254643 | A | . | 152926 |
| 254644 | A | . | 152926 |
| 254645 | C | . | 152926 |
| 254646 | G | . | 152926 |
| 254659 | C | . | 152914 |
| 254660 | T | . | 152914 |
| 254661 | G | . | 152914 |
| 254662 | A | . | 152914 |
| 254663 | G | . | 152914 |
| 254674 | G | T | 152904 |
| 254703 | G | T | 152875 |
| 254734 | C | A | 152844 |
| 254796 | . | G | 152781 |
| 254818 | T | G | 152759 |
| 254976 | G | . | 152601 |
| 254977 | A | . | 152601 |
| 254978 | A | . | 152601 |
| 254979 | A | . | 152601 |
| 255124 | G | T | 152457 |
| 255870 | A | C | 151711 |
| 255984 | C | A | 151597 |
| 256247 | G | T | 151334 |
| 257400 | G | A | 150181 |
| 257502 | . | G | 150078 |
| 257629 | C | T | 149951 |
| 257630 | A | G | 149950 |
| 257636 | C | G | 149944 |
| 257639 | C | T | 149941 |
| 257640 | C | G | 149940 |
| 257646 | G | A | 149934 |
| 257650 | G | A | 149930 |
| 257665 | T | A | 149915 |
| 257676 | A | G | 149904 |
| 257677 | C | G | 149903 |
| 257678 | G | A | 149902 |
| 257681 | G | C | 149899 |
| 257685 | A | T | 149895 |
| 257696 | C | T | 149884 |
| 257697 | G | C | 149883 |
| 257711 | A | C | 149869 |
| 257716 | T | G | 149864 |
| 257720 | T | G | 149860 |
| 257722 | T | C | 149858 |
| 257723 | A | G | 149857 |
| 257740 | C | G | 149840 |
| 257741 | T | A | 149839 |
| 257742 | T | C | 149838 |
| 257743 | C | T | 149837 |

|        |   |   |        |
|--------|---|---|--------|
| 257755 | A | T | 149825 |
| 257756 | C | G | 149824 |
| 257765 | G | A | 149815 |
| 257766 | A | G | 149814 |
| 257767 | A | T | 149813 |
| 257768 | G | C | 149812 |
| 257788 | G | A | 149792 |
| 257792 | T | A | 149788 |
| 257795 | G | A | 149785 |
| 257797 | C | A | 149783 |
| 257798 | A | T | 149782 |
| 257806 | C | T | 149774 |
| 257809 | T | A | 149771 |
| 257812 | T | A | 149768 |
| 257814 | T | G | 149766 |
| 257817 | T | C | 149763 |
| 257827 | G | C | 149753 |
| 257830 | C | T | 149750 |
| 257839 | C | G | 149741 |
| 257843 | A | C | 149737 |
| 257847 | C | T | 149733 |
| 257858 | C | T | 149722 |
| 257865 | C | T | 149715 |
| 257889 | C | T | 149691 |
| 257891 | A | C | 149689 |
| 257896 | C | T | 149684 |
| 257897 | G | A | 149683 |
| 257898 | G | C | 149682 |
| 257899 | T | C | 149681 |
| 257902 | G | T | 149678 |
| 257905 | C | T | 149675 |
| 257909 | . | G | 149667 |
| 257909 | . | G | 149668 |
| 257909 | . | A | 149669 |
| 257909 | . | A | 149670 |
| 257913 | C | A | 149663 |
| 257915 | T | C | 149661 |
| 257918 | A | C | 149658 |
| 257924 | C | G | 149652 |
| 257926 | T | C | 149650 |
| 257927 | T | A | 149649 |
| 257928 | T | A | 149648 |
| 257946 | C | T | 149630 |
| 257950 | A | T | 149626 |
| 257951 | A | T | 149625 |
| 257954 | A | G | 149622 |
| 257956 | G | C | 149620 |
| 257957 | C | A | 149619 |
| 257962 | C | A | 149614 |
| 257969 | G | A | 149607 |
| 257972 | A | G | 149604 |
| 258157 | T | G | 149419 |
| 258165 | . | G | 149405 |



|        |   |   |        |
|--------|---|---|--------|
| 258165 | . | A | 149406 |
| 258165 | . | A | 149407 |
| 258165 | . | A | 149408 |
| 258165 | . | A | 149409 |
| 258165 | . | A | 149410 |
| 258190 | G | T | 149380 |
| 258328 | C | A | 149242 |
| 258468 | T | G | 149102 |
| 258538 | G | . | 149032 |
| 258539 | A | . | 149032 |
| 258540 | A | . | 149032 |
| 258541 | A | . | 149032 |
| 258542 | G | . | 149032 |
| 258543 | A | . | 149032 |
| 258544 | G | . | 149032 |
| 258545 | A | . | 149032 |
| 258546 | A | . | 149032 |
| 258911 | T | G | 148668 |
| 258926 | C | A | 148653 |
| 259119 | A | C | 148460 |
| 259149 | T | G | 148430 |
| 259328 | C | A | 148251 |
| 259354 | A | C | 148225 |
| 259529 | G | T | 148050 |
| 259612 | G | T | 147967 |
| 259624 | G | T | 147955 |
| 259885 | G | T | 147694 |
| 259886 | A | C | 147693 |
| 259954 | G | . | 147625 |
| 259955 | A | . | 147625 |
| 259956 | A | . | 147625 |
| 259957 | G | . | 147625 |
| 260016 | G | T | 147567 |
| 260074 | G | T | 147509 |
| 260463 | C | A | 147120 |
| 261019 | T | G | 146564 |
| 261523 | G | T | 146060 |
| 261634 | . | C | 145945 |
| 261634 | . | G | 145946 |
| 261634 | . | C | 145947 |
| 261634 | . | G | 145948 |
| 261780 | C | A | 145799 |
| 261793 | G | T | 145786 |
| 261881 | A | C | 145698 |
| 262393 | C | A | 145186 |
| 262400 | G | T | 145179 |
| 262434 | T | A | 144884 |
| 262448 | G | . | 145131 |
| 262530 | A | C | 144788 |
| 262541 | T | G | 144777 |
| 262548 | C | A | 144770 |
| 262566 | C | A | 144752 |
| 263494 | T | G | 143824 |

|        |   |   |        |
|--------|---|---|--------|
| 263500 | A | C | 143818 |
| 263558 | A | C | 143760 |
| 264419 | A | C | 142899 |
| 264430 | C | A | 142888 |
| 264490 | G | . | 142828 |
| 264492 | C | . | 142827 |
| 264493 | A | . | 142827 |
| 264494 | G | . | 142827 |
| 264604 | . | C | 142717 |
| 264605 | A | C | 142716 |
| 264606 | A | C | 142715 |
| 264607 | A | C | 142714 |
| 264853 | . | A | 142467 |
| 264926 | T | G | 142394 |
| 265612 | A | C | 141708 |
| 266330 | A | C | 140990 |
| 266512 | T | G | 140808 |
| 266624 | A | C | 140696 |
| 266635 | A | C | 140685 |
| 266655 | C | A | 140665 |
| 267243 | T | G | 140077 |
| 267720 | A | C | 139600 |
| 267820 | A | C | 139500 |
| 268314 | T | G | 139006 |
| 268376 | A | C | 138944 |
| 268505 | A | C | 138815 |
| 268554 | T | G | 138766 |
| 268655 | G | . | 138665 |
| 268656 | T | . | 138665 |
| 268657 | T | . | 138665 |
| 268658 | C | . | 138665 |
| 268704 | G | T | 138620 |
| 268896 | A | C | 138428 |
| 268995 | C | A | 138329 |
| 269076 | . | A | 138247 |
| 269180 | G | T | 138143 |
| 269181 | A | C | 138142 |
| 269694 | T | G | 137629 |
| 269961 | A | C | 137362 |
| 273185 | A | C | 178365 |
| 273215 | . | G | 178334 |
| 273216 | . | G | 178332 |
| 273218 | C | A | 178330 |
| 273221 | A | C | 178327 |
| 273223 | A | T | 178325 |
| 273537 | G | T | 178011 |
| 273544 | A | C | 178004 |
| 273569 | C | A | 177979 |
| 273745 | G | T | 177803 |
| 273775 | T | G | 177773 |
| 273937 | G | T | 177611 |
| 274507 | C | A | 177041 |
| 274697 | C | A | 176851 |

|        |   |   |        |
|--------|---|---|--------|
| 274889 | . | A | 176656 |
| 274889 | . | T | 176657 |
| 274889 | . | T | 176658 |
| 274978 | T | G | 176567 |
| 274984 | A | C | 176561 |
| 275119 | G | T | 176426 |
| 275506 | G | T | 176039 |
| 275567 | C | A | 175978 |
| 275764 | . | T | 175777 |
| 275764 | . | T | 175778 |
| 275764 | . | T | 175779 |
| 275764 | . | T | 175780 |
| 275864 | A | C | 175677 |
| 275887 | G | T | 175654 |
| 276323 | G | T | 175218 |
| 276663 | C | A | 174878 |
| 276666 | T | G | 174875 |
| 276697 | A | C | 174844 |
| 276702 | G | T | 174839 |
| 276841 | A | C | 174700 |
| 276914 | G | T | 174627 |
| 276928 | C | A | 174613 |
| 277126 | T | G | 174415 |
| 277828 | A | C | 173713 |
| 277929 | T | G | 173612 |
| 278124 | C | A | 173417 |
| 278202 | C | A | 173339 |
| 278209 | G | T | 173332 |
| 278544 | A | C | 172997 |
| 278806 | C | A | 172735 |
| 279152 | G | T | 172389 |
| 279555 | . | C | 171981 |
| 279555 | . | C | 171982 |
| 279555 | . | T | 171983 |
| 279555 | . | T | 171984 |
| 279555 | . | T | 171985 |
| 279603 | T | G | 171933 |
| 279893 | G | T | 171643 |
| 280058 | T | G | 171478 |
| 280082 | . | T | 171452 |
| 280082 | . | C | 171453 |
| 280083 | . | T | 171448 |
| 280083 | . | C | 171449 |
| 280083 | . | T | 171450 |
| 280286 | A | C | 171245 |
| 280341 | T | C | 171190 |
| 280360 | T | G | 171171 |
| 280590 | C | A | 170941 |
| 280783 | T | G | 170748 |
| 280923 | T | G | 170608 |
| 281288 | G | T | 170243 |
| 281420 | G | T | 170111 |
| 281431 | A | C | 170100 |

|        |   |   |        |
|--------|---|---|--------|
| 281436 | G | T | 170095 |
| 281525 | A | C | 170006 |
| 281531 | C | A | 170000 |
| 281563 | A | C | 169968 |
| 282093 | A | G | 169438 |
| 282107 | A | G | 169424 |
| 282152 | A | . | 169379 |
| 282154 | A | G | 169378 |
| 282159 | G | C | 169373 |
| 282220 | G | T | 169312 |
| 282231 | C | A | 169301 |
| 282315 | T | G | 169217 |
| 282347 | T | G | 169185 |
| 282349 | C | A | 169183 |
| 282367 | C | T | 169165 |
| 282471 | G | T | 169061 |
| 282856 | C | T | 168676 |
| 283406 | C | A | 168126 |
| 283550 | C | A | 167982 |
| 283645 | T | G | 167887 |
| 284364 | T | G | 167168 |
| 284466 | C | A | 167066 |
| 284875 | A | . | 166657 |
| 284876 | T | . | 166657 |
| 284877 | T | . | 166657 |
| 284878 | C | . | 166657 |
| 284879 | T | . | 166657 |
| 284944 | G | T | 166593 |
| 289055 | A | G | 232160 |
| 289112 | T | G | 232217 |
| 289113 | C | A | 232218 |
| 289116 | A | C | 232221 |
| 289119 | T | C | 232224 |
| 289121 | T | A | 232226 |
| 289123 | G | . | 232227 |
| 289127 | G | . | 232230 |
| 289129 | C | . | 232231 |
| 289130 | C | . | 232231 |
| 289131 | C | . | 232231 |
| 289132 | T | . | 232231 |
| 289134 | T | . | 232232 |
| 289137 | C | A | 232235 |
| 289140 | C | G | 232238 |
| 289145 | . | G | 232244 |
| 289170 | G | T | 232269 |
| 289171 | A | C | 232270 |
| 289176 | T | G | 232275 |
| 289363 | C | G | 232456 |
| 289367 | C | T | 232460 |
| 289369 | G | T | 232462 |
| 289407 | T | G | 232500 |
| 289642 | G | T | 232735 |
| 289851 | T | . | 232943 |

|        |   |   |        |
|--------|---|---|--------|
| 289852 | T | . | 232943 |
| 289853 | T | . | 232943 |
| 289854 | C | . | 232943 |
| 289855 | T | . | 232943 |
| 289856 | G | . | 232943 |
| 289857 | T | . | 232943 |
| 289858 | C | . | 232943 |
| 289919 | C | A | 233004 |
| 289940 | T | G | 233025 |
| 289986 | T | G | 233071 |
| 290021 | T | G | 233106 |
| 290126 | T | G | 233211 |
| 290201 | A | C | 233286 |
| 290262 | A | . | 233346 |
| 290263 | T | . | 233346 |
| 290264 | A | . | 233346 |
| 290265 | A | . | 233346 |
| 290266 | A | . | 233346 |
| 290641 | C | A | 233721 |
| 290659 | C | A | 233739 |
| 290763 | . | T | 233844 |
| 290763 | . | G | 233845 |
| 290763 | . | T | 233846 |
| 290770 | C | A | 233853 |
| 290803 | A | C | 233886 |
| 290939 | T | G | 234022 |
| 291008 | G | T | 234091 |
| 291527 | G | T | 234610 |
| 291705 | C | A | 234788 |
| 291902 | . | T | 234986 |
| 291959 | C | A | 235043 |
| 291981 | C | A | 235065 |
| 292095 | G | T | 235179 |
| 292324 | A | C | 235408 |
| 292337 | C | A | 235421 |
| 292384 | . | A | 235469 |
| 292600 | C | A | 235685 |
| 293112 | G | T | 236197 |
| 293119 | A | C | 236204 |
| 293131 | A | C | 236216 |
| 293313 | T | G | 236398 |
| 293330 | C | A | 236415 |
| 293526 | A | C | 236611 |
| 293528 | A | C | 236613 |
| 293745 | G | T | 236830 |
| 293782 | G | T | 236867 |
| 293813 | A | C | 236898 |
| 293925 | T | G | 237010 |
| 293926 | C | A | 237011 |
| 293933 | A | C | 237018 |
| 294038 | A | C | 237123 |
| 294088 | . | T | 237174 |
| 294090 | . | T | 237177 |

|        |   |   |        |
|--------|---|---|--------|
| 294438 | G | T | 237525 |
| 294505 | G | T | 237592 |
| 295110 | . | C | 238198 |
| 295110 | . | G | 238199 |
| 295110 | . | C | 238200 |
| 295110 | . | C | 238201 |
| 295412 | G | T | 238503 |
| 295744 | C | A | 238835 |
| 295750 | A | C | 238841 |
| 295955 | A | C | 239046 |
| 296215 | G | T | 239306 |
| 296226 | G | T | 239317 |
| 296261 | . | T | 239353 |
| 296267 | A | C | 239359 |
| 296299 | A | C | 239391 |
| 296368 | G | T | 239460 |
| 296485 | . | A | 239578 |
| 296485 | . | A | 239579 |
| 296485 | . | A | 239580 |
| 296485 | . | A | 239581 |
| 296570 | T | G | 239666 |
| 297042 | A | C | 240138 |
| 297044 | C | A | 240140 |
| 297201 | G | T | 240297 |
| 297211 | T | G | 240307 |
| 297545 | C | A | 240641 |
| 297646 | G | T | 240742 |
| 297654 | C | A | 240750 |
| 297659 | G | T | 240755 |
| 297919 | G | T | 241015 |
| 297920 | A | C | 241016 |
| 298241 | C | A | 241337 |
| 298647 | A | C | 241743 |
| 298667 | G | T | 241763 |
| 299207 | T | G | 242303 |
| 299420 | A | . | 242515 |
| 299421 | A | . | 242515 |
| 299422 | T | . | 242515 |
| 299423 | A | . | 242515 |
| 299424 | A | . | 242515 |
| 299425 | G | . | 242515 |
| 299426 | T | . | 242515 |
| 299427 | C | . | 242515 |
| 299442 | G | T | 242530 |
| 299782 | A | C | 242870 |
| 300151 | T | G | 243239 |
| 300213 | A | C | 243301 |
| 300607 | A | C | 243695 |
| 300911 | A | C | 243999 |
| 301733 | A | . | 244820 |
| 301734 | C | . | 244820 |
| 301735 | C | . | 244820 |
| 301736 | C | . | 244820 |

|        |   |   |        |
|--------|---|---|--------|
| 301737 | A | . | 244820 |
| 301738 | G | . | 244820 |
| 301739 | A | . | 244820 |
| 301740 | G | . | 244820 |
| 301770 | G | T | 244850 |
| 302235 | T | G | 245315 |
| 302236 | C | A | 245316 |
| 302620 | T | G | 245700 |
| 302667 | C | A | 245747 |
| 302675 | A | C | 245755 |
| 302698 | G | A | 245778 |
| 303098 | T | G | 246178 |
| 303125 | G | T | 246205 |
| 303185 | . | A | 246266 |
| 303698 | T | G | 246779 |
| 303736 | T | G | 246817 |
| 303914 | A | C | 246995 |
| 303987 | G | T | 247068 |
| 304002 | C | A | 247083 |
| 304122 | T | G | 247203 |
| 304696 | T | G | 247777 |
| 304902 | C | A | 247983 |
| 304965 | C | A | 248046 |
| 304979 | G | T | 248060 |
| 305136 | C | A | 248217 |
| 305142 | C | A | 248223 |
| 305151 | T | G | 248232 |
| 305152 | C | A | 248233 |
| 305157 | A | C | 248238 |
| 305453 | G | T | 248534 |
| 305478 | C | A | 248559 |
| 305614 | C | A | 248695 |
| 305631 | G | T | 248712 |
| 305884 | C | A | 248965 |
| 305950 | C | A | 249031 |
| 306011 | A | C | 249092 |
| 306101 | G | T | 249182 |
| 306102 | G | T | 249183 |
| 306192 | C | A | 249273 |
| 306280 | T | G | 249361 |
| 306526 | C | A | 249607 |
| 306571 | G | T | 249652 |
| 306782 | A | C | 249863 |
| 307043 | T | A | 250124 |
| 307054 | C | A | 250135 |
| 307392 | T | G | 250473 |
| 307553 | G | T | 250634 |
| 307759 | G | . | 250839 |
| 307760 | C | . | 250839 |
| 307761 | C | . | 250839 |
| 307762 | A | . | 250839 |
| 307763 | A | . | 250839 |
| 307764 | T | . | 250839 |

|        |   |   |        |
|--------|---|---|--------|
| 307765 | C | . | 250839 |
| 307766 | C | . | 250839 |
| 307767 | A | . | 250839 |
| 308039 | G | . | 251110 |
| 308040 | A | . | 251110 |
| 308041 | A | . | 251110 |
| 308042 | C | . | 251110 |
| 308104 | C | A | 251172 |
| 308138 | T | G | 251206 |
| 308164 | G | T | 251232 |
| 308473 | A | C | 251541 |
| 308819 | G | T | 251887 |
| 308820 | A | C | 251888 |
| 308888 | T | G | 251956 |
| 309336 | T | G | 252404 |
| 309343 | A | C | 252411 |
| 309581 | A | C | 252649 |
| 309585 | A | C | 252653 |
| 309589 | G | T | 252657 |
| 310024 | G | T | 253092 |
| 310091 | A | C | 253159 |
| 310182 | T | G | 253250 |
| 310183 | C | A | 253251 |
| 310324 | G | T | 253392 |
| 310357 | G | T | 253425 |
| 310426 | G | T | 253494 |
| 310441 | A | C | 253509 |
| 310823 | A | C | 253891 |
| 310866 | G | T | 253934 |
| 311053 | T | G | 254121 |
| 311057 | C | A | 254125 |
| 311266 | G | T | 254334 |
| 311271 | G | T | 254339 |
| 311337 | A | C | 254405 |
| 312075 | C | A | 255143 |
| 312472 | G | T | 255540 |
| 312560 | G | T | 255628 |
| 312580 | T | G | 255648 |
| 312612 | A | C | 255680 |
| 312687 | T | G | 255755 |
| 312702 | C | A | 255770 |
| 312772 | C | A | 255840 |
| 312977 | C | A | 256045 |
| 312984 | A | C | 256052 |
| 313058 | C | A | 256126 |
| 313083 | T | G | 256151 |
| 313097 | G | T | 256165 |
| 313346 | G | T | 256414 |
| 313667 | G | T | 256735 |
| 313714 | C | A | 256782 |
| 313796 | C | A | 256864 |
| 315180 | A | C | 258248 |
| 315220 | T | G | 258288 |



|        |   |   |        |
|--------|---|---|--------|
| 315281 | A | T | 258349 |
| 315541 | C | A | 258609 |
| 315611 | T | G | 258679 |
| 315635 | C | A | 258703 |
| 315647 | A | C | 258715 |
| 315666 | T | G | 258734 |
| 315797 | A | C | 258865 |
| 315825 | T | G | 258893 |
| 315842 | A | C | 258910 |
| 316052 | G | T | 259120 |
| 316069 | A | C | 259137 |
| 316139 | A | C | 259207 |
| 316695 | C | A | 259763 |
| 316700 | C | A | 259768 |
| 316951 | A | C | 260019 |
| 317017 | C | A | 260085 |
| 317046 | G | T | 260114 |
| 317205 | G | T | 260273 |
| 317393 | G | T | 260461 |
| 317500 | C | A | 260568 |
| 317865 | A | C | 260933 |
| 317950 | A | C | 261018 |
| 318045 | C | A | 261113 |
| 318052 | A | C | 261120 |
| 318345 | A | C | 261413 |
| 318349 | A | C | 261417 |
| 318401 | A | C | 261469 |
| 318453 | T | G | 261521 |
| 318892 | A | C | 261960 |
| 319001 | A | . | 262068 |
| 319002 | T | . | 262068 |
| 319003 | A | . | 262068 |
| 319004 | T | . | 262068 |
| 319225 | G | T | 262289 |
| 319284 | G | . | 262347 |
| 319285 | A | . | 262347 |
| 319286 | A | . | 262347 |
| 319287 | A | . | 262347 |
| 319288 | T | . | 262347 |
| 319428 | A | . | 262486 |
| 319429 | C | . | 262486 |
| 319430 | T | . | 262486 |
| 319431 | C | . | 262486 |
| 319432 | A | . | 262486 |
| 319433 | T | . | 262486 |
| 319434 | T | . | 262486 |
| 319435 | T | . | 262486 |
| 319436 | A | . | 262486 |
| 319437 | A | . | 262486 |
| 319438 | T | . | 262486 |
| 319439 | G | . | 262486 |
| 319570 | A | C | 262617 |
| 319658 | C | A | 262705 |

|        |   |   |        |
|--------|---|---|--------|
| 320323 | T | G | 263370 |
| 320393 | C | A | 263440 |
| 320403 | T | G | 263450 |
| 320824 | T | G | 263871 |
| 320963 | T | G | 264010 |
| 320968 | G | T | 264015 |
| 320969 | A | C | 264016 |
| 321111 | G | T | 264158 |
| 321590 | G | T | 264637 |
| 321600 | T | G | 264647 |
| 322047 | T | G | 265094 |
| 322420 | A | . | 265466 |
| 322421 | G | . | 265466 |
| 322422 | G | . | 265466 |
| 322423 | G | . | 265466 |
| 322513 | G | T | 265556 |
| 322616 | C | A | 265659 |
| 323109 | A | C | 266152 |
| 323114 | G | T | 266157 |
| 323131 | C | A | 266174 |
| 323168 | G | T | 266211 |
| 323257 | G | T | 266300 |
| 323323 | C | A | 266366 |
| 323339 | T | G | 266382 |
| 323570 | G | T | 266613 |
| 324206 | G | T | 267249 |
| 324476 | T | G | 267519 |
| 324542 | G | A | 267585 |
| 325105 | G | T | 268148 |
| 325109 | C | A | 268152 |
| 325191 | A | C | 268234 |
| 325784 | A | C | 268827 |
| 325943 | G | T | 268986 |
| 326359 | A | C | 269402 |
| 326439 | A | C | 269482 |
| 326462 | C | A | 269505 |
| 326514 | T | G | 269557 |
| 326593 | C | A | 269636 |
| 327205 | C | . | 270247 |
| 327206 | T | . | 270247 |
| 327207 | T | . | 270247 |
| 327208 | C | . | 270247 |
| 327287 | C | A | 270326 |
| 327376 | C | A | 270415 |
| 327613 | C | A | 270652 |
| 327649 | C | A | 270688 |
| 327834 | G | T | 270873 |
| 327879 | G | T | 270918 |
| 328130 | . | T | 271170 |
| 328163 | A | C | 271203 |
| 328416 | C | A | 271456 |
| 328661 | C | A | 271701 |
| 329227 | A | C | 272267 |

|        |   |   |        |
|--------|---|---|--------|
| 329383 | G | . | 272422 |
| 329384 | A | . | 272422 |
| 329385 | A | . | 272422 |
| 329386 | A | . | 272422 |
| 329387 | T | . | 272422 |
| 329703 | C | A | 272738 |
| 329913 | . | T | 272949 |
| 330080 | G | T | 273116 |
| 330209 | C | A | 273245 |
| 330525 | A | C | 273561 |
| 330804 | G | T | 273840 |
| 330811 | C | A | 273847 |
| 330834 | A | C | 273870 |
| 331075 | G | T | 274111 |
| 331347 | G | T | 274383 |
| 331572 | T | G | 274608 |
| 331682 | A | C | 274718 |
| 331738 | T | G | 274774 |
| 331794 | A | C | 274830 |
| 331879 | T | G | 274915 |
| 331880 | C | A | 274916 |
| 331884 | T | G | 274920 |
| 331967 | G | T | 275003 |
| 332009 | A | C | 275045 |
| 332013 | G | T | 275049 |
| 332091 | C | A | 275127 |
| 332100 | T | G | 275136 |
| 336257 | T | G | 342744 |
| 336315 | . | G | 342685 |
| 336319 | A | T | 342681 |
| 336322 | A | T | 342678 |
| 336406 | G | T | 342594 |
| 336418 | C | A | 342582 |
| 336560 | T | G | 342440 |
| 336562 | . | T | 342435 |
| 336562 | . | C | 342436 |
| 336562 | . | T | 342437 |
| 336565 | . | C | 342430 |
| 336565 | . | T | 342431 |
| 336572 | C | A | 342423 |
| 336575 | A | T | 342420 |
| 336581 | C | A | 342414 |
| 336652 | T | G | 342343 |
| 336733 | C | A | 342262 |
| 336756 | C | T | 342239 |
| 336814 | A | C | 342181 |
| 336882 | C | A | 342113 |
| 337085 | A | C | 341910 |
| 337561 | A | C | 341434 |
| 337690 | A | C | 341305 |
| 338133 | G | T | 340862 |
| 338264 | G | T | 340731 |
| 338423 | A | C | 340572 |

|        |   |   |        |
|--------|---|---|--------|
| 338551 | A | C | 340444 |
| 338573 | T | G | 340422 |
| 338987 | T | G | 340008 |
| 339082 | G | T | 339913 |
| 339265 | A | C | 339730 |
| 339449 | G | T | 339546 |
| 339557 | C | A | 339438 |
| 339624 | T | G | 339371 |
| 339647 | A | C | 339348 |
| 339835 | . | A | 339155 |
| 339835 | . | T | 339156 |
| 339835 | . | T | 339157 |
| 339835 | . | T | 339158 |
| 339835 | . | G | 339159 |
| 339916 | C | A | 339074 |
| 339946 | G | T | 339044 |
| 339952 | C | A | 339038 |
| 340023 | C | A | 338967 |
| 340089 | T | G | 338901 |
| 340379 | G | T | 338611 |
| 340428 | T | G | 338562 |
| 340487 | G | T | 338503 |
| 340543 | A | C | 338447 |
| 340602 | T | G | 338388 |
| 340615 | C | A | 338375 |
| 340883 | T | G | 338107 |
| 341090 | G | T | 337900 |
| 341155 | G | T | 337835 |
| 341265 | T | G | 337725 |
| 341266 | C | A | 337724 |
| 341418 | C | A | 99093  |
| 341457 | T | G | 99054  |
| 341459 | G | T | 99052  |
| 341905 | A | C | 30515  |
| 341933 | C | . | 30542  |
| 341934 | A | . | 30542  |
| 341935 | A | . | 30542  |
| 341936 | A | . | 30542  |
| 341937 | G | . | 30542  |
| 342367 | T | G | 30972  |
| 342455 | G | T | 31060  |
| 342558 | C | A | 229286 |
| 342694 | T | G | 229422 |
| 342695 | C | A | 229423 |
| 342749 | A | G | 229477 |
| 342844 | T | G | 229572 |
| 342845 | C | A | 229573 |
| 342853 | C | A | 229581 |
| 343131 | C | A | 229859 |
| 343357 | G | T | 230085 |
| 343479 | T | G | 230207 |
| 344146 | G | T | 230874 |
| 344372 | A | C | 231100 |

|        |   |   |        |
|--------|---|---|--------|
| 344392 | C | A | 231120 |
| 344396 | T | G | 231124 |
| 344410 | T | G | 231138 |
| 344411 | C | A | 231139 |
| 344416 | G | T | 231144 |
| 344424 | C | . | 194316 |
| 344425 | C | . | 194316 |
| 344426 | C | . | 194316 |
| 344427 | A | . | 194316 |
| 344427 | A | C | 231155 |
| 344428 | C | . | 194316 |
| 344429 | A | . | 194316 |
| 344430 | T | . | 194316 |
| 344431 | G | . | 194316 |
| 344495 | . | T | 194381 |
| 344495 | . | C | 194382 |
| 344505 | T | C | 194392 |
| 345312 | G | T | 275822 |
| 345464 | A | C | 275974 |
| 345476 | G | T | 275986 |
| 345508 | T | G | 276018 |
| 345562 | C | A | 276072 |
| 345732 | C | A | 276242 |
| 345884 | G | T | 276394 |
| 345907 | C | A | 276417 |
| 345963 | A | C | 276473 |
| 346073 | C | A | 276583 |
| 346387 | C | A | 276897 |
| 346506 | A | C | 277016 |
| 346513 | A | C | 277023 |
| 346525 | G | T | 277035 |
| 346927 | T | G | 277437 |
| 346938 | G | T | 277448 |
| 347725 | . | G | 278236 |
| 347944 | T | G | 278455 |
| 347950 | T | G | 278461 |
| 348001 | G | T | 278512 |
| 348267 | C | A | 278778 |
| 348310 | T | G | 278821 |
| 348311 | C | A | 278822 |
| 348332 | C | A | 278843 |
| 348381 | G | T | 278892 |
| 348772 | A | C | 279283 |
| 348778 | T | G | 279289 |
| 348944 | T | G | 279455 |
| 348948 | A | C | 279459 |
| 349362 | G | T | 279873 |
| 349411 | C | A | 279922 |
| 349473 | T | G | 279984 |
| 349727 | . | A | 280239 |
| 349745 | C | A | 280257 |
| 349757 | C | . | 280268 |
| 349758 | G | . | 280268 |

|        |   |   |        |
|--------|---|---|--------|
| 349759 | T | . | 280268 |
| 349760 | T | . | 280268 |
| 349761 | C | . | 280268 |
| 350448 | G | . | 280954 |
| 350449 | T | . | 280954 |
| 350450 | C | . | 280954 |
| 350451 | T | . | 280954 |
| 350880 | G | T | 281383 |
| 351154 | T | G | 281657 |
| 351478 | G | T | 281981 |
| 351693 | . | T | 310238 |
| 351894 | C | A | 282397 |
| 352292 | T | G | 282795 |
| 352393 | T | G | 282896 |
| 352464 | T | G | 282967 |
| 352620 | T | G | 283123 |
| 352776 | T | G | 283279 |
| 352928 | T | G | 283431 |
| 352997 | T | G | 283500 |
| 353080 | A | C | 283583 |
| 353108 | C | A | 283611 |
| 353119 | C | A | 283622 |
| 353152 | G | T | 283655 |
| 353265 | T | G | 283768 |
| 353443 | A | C | 283946 |
| 353612 | C | A | 284115 |
| 353620 | G | T | 284123 |
| 353733 | A | C | 284236 |
| 353795 | G | T | 284298 |
| 354052 | T | G | 284555 |
| 354220 | G | T | 284723 |
| 354292 | T | G | 284795 |
| 354538 | A | C | 285041 |
| 354829 | G | T | 285332 |
| 355105 | C | A | 285608 |
| 356162 | T | G | 343616 |
| 356474 | G | T | 343928 |
| 356996 | C | A | 344450 |
| 357881 | A | C | 345335 |
| 357950 | . | T | 345405 |
| 358315 | T | G | 345770 |
| 358316 | C | A | 345771 |
| 358373 | T | G | 345828 |
| 358402 | . | A | 345858 |
| 359394 | G | A | 346850 |
| 359838 | T | G | 347294 |
| 360062 | . | T | 347519 |
| 360062 | . | G | 347520 |
| 360062 | . | G | 347521 |
| 361142 | C | A | 66124  |
| 361142 | C | A | 348601 |
| 361171 | C | A | 66095  |
| 361171 | C | A | 348630 |

|        |   |   |        |
|--------|---|---|--------|
| 361182 | C | . | 348640 |
| 361183 | T | . | 348640 |
| 361184 | C | . | 348640 |
| 361185 | A | . | 348640 |
| 361186 | G | . | 348640 |
| 361199 | C | . | 348652 |
| 361200 | G | . | 348652 |
| 361201 | T | . | 348652 |
| 361202 | T | . | 348652 |
| 361203 | G | . | 348652 |
| 361204 | T | . | 348652 |
| 361205 | T | . | 348652 |
| 361206 | T | . | 348652 |
| 361279 | A | C | 348725 |
| 361314 | . | T | 348761 |
| 361318 | . | T | 348766 |
| 361582 | C | A | 349030 |
| 361786 | A | C | 349234 |
| 362035 | T | G | 349483 |
| 362340 | G | T | 349788 |
| 362767 | G | T | 335604 |
| 363123 | A | C | 335248 |
| 363270 | C | A | 335101 |
| 363352 | T | G | 335019 |
| 363425 | A | C | 334946 |
| 363476 | T | G | 334895 |
| 363876 | A | C | 31645  |
| 364075 | A | C | 31844  |
| 364254 | A | G | 32023  |
| 364413 | C | A | 32182  |
| 364480 | T | G | 32249  |
| 364587 | G | T | 32356  |
| 364691 | G | T | 32460  |
| 364876 | G | T | 32645  |
| 364947 | A | C | 32716  |
| 366373 | A | C | 34142  |
| 366451 | G | T | 34220  |
| 366452 | A | C | 34221  |
| 366735 | T | G | 34504  |
| 366822 | G | T | 34591  |
| 366977 | T | G | 34746  |
| 367707 | T | G | 35476  |
| 367816 | G | T | 35585  |
| 367855 | C | A | 35624  |
| 367876 | T | G | 35645  |
| 367963 | A | C | 35732  |
| 368368 | C | A | 36137  |
| 368482 | T | G | 36251  |
| 368828 | C | A | 36597  |
| 368905 | A | C | 36674  |
| 369445 | G | T | 37214  |
| 369497 | C | A | 37266  |
| 370076 | T | G | 37845  |

|        |   |   |        |
|--------|---|---|--------|
| 370373 | G | T | 38142  |
| 370502 | C | A | 38271  |
| 370759 | A | C | 38528  |
| 370981 | T | G | 38750  |
| 371033 | T | G | 38802  |
| 371041 | C | A | 38810  |
| 371076 | A | C | 38845  |
| 371113 | A | C | 38882  |
| 371156 | T | G | 38925  |
| 371202 | T | G | 38971  |
| 371207 | G | T | 38976  |
| 371468 | A | C | 39237  |
| 371583 | G | T | 39352  |
| 371631 | C | A | 39400  |
| 371654 | A | C | 39423  |
| 371753 | C | A | 39522  |
| 371801 | C | A | 39570  |
| 371809 | T | G | 39578  |
| 371810 | C | A | 39579  |
| 371845 | A | C | 39614  |
| 372048 | C | A | 39817  |
| 372049 | T | G | 39818  |
| 372054 | T | G | 39823  |
| 372064 | G | T | 39833  |
| 372065 | A | C | 39834  |
| 372149 | T | C | 39918  |
| 373770 | G | T | 371619 |
| 374363 | A | C | 371026 |
| 374365 | C | A | 371024 |
| 374418 | T | G | 370971 |
| 374589 | G | T | 370800 |
| 374630 | . | T | 370758 |
| 374745 | C | A | 370643 |
| 374809 | G | T | 370579 |
| 374858 | A | C | 370530 |
| 375079 | T | G | 370309 |
| 375224 | G | T | 370164 |
| 375388 | A | C | 370000 |
| 375732 | T | G | 369656 |
| 376189 | A | C | 369199 |
| 376351 | G | T | 369037 |
| 376553 | A | C | 368835 |
| 377392 | C | A | 367996 |
| 377484 | C | A | 367904 |
| 377582 | . | A | 367805 |
| 377765 | C | A | 367622 |
| 377828 | A | C | 367559 |
| 377900 | C | A | 367487 |
| 378027 | C | A | 367360 |
| 378290 | T | G | 367097 |
| 378350 | G | T | 367037 |
| 379306 | T | G | 366081 |
| 379407 | G | T | 365980 |



|        |   |   |        |
|--------|---|---|--------|
| 379503 | T | G | 365884 |
| 379887 | A | C | 365500 |
| 380044 | C | A | 365343 |
| 380086 | A | C | 365301 |
| 380205 | C | A | 365182 |
| 380778 | G | T | 364609 |
| 380858 | G | T | 364529 |
| 380885 | C | A | 364502 |
| 381143 | T | G | 364244 |
| 381156 | C | A | 364231 |
| 381165 | A | C | 364222 |
| 381170 | G | T | 364217 |
| 381231 | T | G | 364156 |
| 381238 | T | . | 364149 |
| 381239 | C | . | 364149 |
| 381240 | G | . | 364149 |
| 381340 | T | G | 364050 |
| 381389 | A | C | 364001 |
| 381420 | G | T | 363970 |
| 381444 | C | A | 363946 |
| 381449 | . | A | 363940 |
| 381470 | . | A | 363918 |
| 381653 | A | C | 363735 |
| 381677 | T | G | 363711 |
| 381749 | C | A | 363639 |
| 381754 | G | T | 363634 |
| 381800 | T | G | 363588 |
| 381892 | A | C | 363496 |
| 381970 | T | . | 363418 |
| 381971 | A | . | 363418 |
| 381972 | A | . | 363418 |
| 381973 | T | . | 363418 |
| 381974 | A | . | 363418 |
| 381996 | T | G | 363397 |
| 382006 | T | G | 363387 |
| 382068 | C | A | 363325 |
| 382073 | A | C | 363320 |
| 382103 | A | C | 363290 |
| 382270 | G | T | 363123 |
| 382285 | G | T | 363108 |
| 382300 | T | G | 363093 |
| 382385 | A | C | 363008 |
| 382442 | A | C | 362951 |
| 382454 | A | C | 362939 |
| 382551 | G | T | 362842 |
| 382568 | G | T | 362825 |
| 382621 | C | A | 362772 |
| 382661 | G | T | 362732 |
| 382786 | T | G | 362607 |
| 382814 | C | T | 362579 |
| 382935 | A | C | 362458 |
| 383339 | T | G | 362054 |
| 383361 | G | T | 362032 |

|        |   |   |        |
|--------|---|---|--------|
| 383414 | A | C | 361979 |
| 383441 | G | . | 361952 |
| 383442 | G | . | 361952 |
| 383443 | A | . | 361952 |
| 383444 | A | . | 361952 |
| 383653 | G | T | 361744 |
| 383723 | T | G | 361674 |
| 384004 | A | C | 361393 |
| 384263 | T | . | 361134 |
| 384264 | G | . | 361134 |
| 384265 | A | . | 361134 |
| 384266 | G | . | 361134 |
| 384267 | A | . | 361134 |
| 384268 | T | . | 361134 |
| 384269 | T | . | 361134 |
| 384286 | C | A | 361118 |
| 384410 | C | A | 360994 |
| 384493 | G | T | 360911 |
| 384494 | A | C | 360910 |
| 384499 | T | C | 360905 |
| 384500 | G | T | 360904 |
| 384516 | C | A | 360888 |
| 384720 | C | A | 360684 |
| 384758 | C | . | 360646 |
| 384759 | C | . | 360646 |
| 384760 | G | . | 360646 |
| 384761 | C | . | 360646 |
| 384988 | T | G | 360420 |
| 385293 | T | G | 360115 |
| 385404 | T | G | 360004 |
| 385426 | C | A | 359982 |
| 385544 | . | T | 359863 |
| 385612 | G | . | 359795 |
| 385660 | T | G | 359748 |
| 385661 | C | A | 359747 |
| 385664 | A | C | 359744 |
| 385768 | G | T | 359640 |
| 385896 | G | T | 359512 |
| 385927 | T | G | 359481 |
| 386028 | . | C | 359379 |
| 386030 | A | C | 359377 |
| 386184 | A | C | 359223 |
| 386774 | C | . | 358633 |
| 386871 | G | T | 358537 |
| 386879 | G | T | 358529 |
| 387169 | G | T | 358239 |
| 387212 | G | T | 358196 |
| 387229 | T | G | 358179 |
| 387550 | G | T | 357858 |
| 387772 | . | T | 357635 |
| 387774 | A | C | 357633 |
| 387778 | G | T | 357629 |
| 387884 | A | C | 357523 |

|        |   |   |        |
|--------|---|---|--------|
| 387886 | . | G | 357517 |
| 387886 | . | A | 357518 |
| 387886 | . | C | 357519 |
| 387886 | . | T | 357520 |
| 387924 | G | T | 357479 |
| 387937 | C | A | 357466 |
| 388127 | T | G | 357276 |
| 388169 | . | A | 357233 |
| 388236 | A | C | 357166 |
| 388268 | T | G | 357134 |
| 388291 | C | A | 357111 |
| 388488 | T | G | 356914 |
| 388489 | C | A | 356913 |
| 388576 | T | G | 356826 |
| 388804 | A | C | 356598 |
| 389141 | A | . | 356261 |
| 389142 | C | . | 356261 |
| 389143 | T | . | 356261 |
| 389144 | C | . | 356261 |
| 389145 | A | . | 356261 |
| 389212 | T | G | 356195 |
| 389325 | C | A | 356082 |
| 389473 | G | . | 355934 |
| 389474 | A | . | 355934 |
| 389476 | C | T | 355933 |
| 389478 | T | . | 355931 |
| 389550 | G | T | 355860 |
| 389912 | T | G | 355498 |
| 390010 | C | A | 355400 |
| 390119 | A | C | 355291 |
| 390291 | A | C | 355119 |
| 390402 | C | A | 355008 |
| 390427 | A | G | 354983 |
| 390489 | G | T | 354921 |
| 390501 | T | G | 354909 |
| 390610 | C | A | 354800 |
| 390669 | C | A | 354741 |
| 390726 | G | T | 354684 |
| 390822 | A | C | 354588 |
| 390935 | C | A | 354475 |
| 391082 | G | T | 354328 |
| 391165 | A | C | 354245 |
| 391457 | G | . | 353953 |
| 391458 | G | . | 353953 |
| 391459 | A | . | 353953 |
| 391460 | T | . | 353953 |
| 391461 | C | . | 353953 |
| 391741 | C | A | 353674 |
| 391967 | C | A | 353448 |
| 392120 | C | A | 353295 |
| 392564 | G | T | 352851 |
| 392670 | T | G | 352745 |
| 392675 | A | C | 352740 |

|        |   |   |        |
|--------|---|---|--------|
| 392769 | C | A | 352646 |
| 392894 | T | G | 352521 |
| 392976 | C | A | 352439 |
| 393105 | G | T | 352310 |
| 393119 | C | A | 352296 |
| 393181 | G | T | 352234 |
| 393244 | C | A | 352171 |
| 393322 | A | . | 352093 |
| 393325 | A | . | 352091 |
| 393326 | T | . | 352091 |
| 393327 | T | . | 352091 |
| 393862 | C | A | 351557 |
| 393871 | C | T | 351548 |
| 394106 | . | T | 351309 |
| 394106 | . | A | 351310 |
| 394106 | . | A | 351311 |
| 394106 | . | C | 351312 |
| 394202 | T | G | 351213 |
| 394258 | . | T | 351155 |
| 394258 | . | T | 351156 |
| 394584 | T | C | 350829 |
| 395356 | G | . | 286834 |
| 395357 | A | . | 286834 |
| 395358 | A | . | 286834 |
| 395359 | A | C | 286835 |
| 395361 | A | G | 286837 |
| 395363 | A | T | 286839 |
| 395366 | G | T | 286842 |
| 395367 | A | C | 286843 |
| 395369 | T | A | 286845 |
| 395371 | G | T | 286847 |
| 395372 | A | C | 286848 |
| 395375 | A | T | 286851 |
| 395376 | . | T | 286853 |
| 395376 | . | T | 286854 |
| 395376 | . | T | 286855 |
| 395377 | C | T | 286856 |
| 395379 | G | C | 286858 |
| 395422 | A | C | 286901 |
| 395530 | T | G | 287009 |
| 395535 | C | . | 287013 |
| 395536 | A | . | 287013 |
| 395537 | A | . | 287013 |
| 395538 | G | . | 287013 |
| 395539 | C | . | 287013 |
| 395540 | C | . | 287013 |
| 395541 | A | . | 287013 |
| 395649 | C | A | 287121 |
| 395901 | C | A | 287373 |
| 395915 | T | G | 287387 |
| 396063 | . | T | 287536 |
| 396935 | G | T | 288408 |
| 397177 | G | T | 288650 |

|        |   |   |        |
|--------|---|---|--------|
| 397365 | T | G | 288838 |
| 397462 | A | C | 288935 |
| 397638 | T | G | 289111 |
| 397683 | C | A | 289156 |
| 397879 | A | C | 289352 |
| 398065 | C | A | 289538 |
| 398625 | A | T | 290098 |
| 398628 | G | T | 290101 |
| 398853 | T | G | 290326 |
| 398972 | . | A | 290446 |
| 398972 | . | C | 290447 |
| 398972 | . | A | 290448 |
| 398972 | . | C | 290449 |
| 398972 | . | T | 290450 |
| 399044 | G | T | 290522 |
| 399247 | . | T | 290726 |
| 399282 | C | A | 290761 |
| 399440 | A | C | 290919 |
| 399773 | G | T | 291252 |
| 399774 | A | C | 291253 |
| 399786 | G | T | 291265 |
| 399829 | G | T | 291308 |
| 399937 | G | T | 291416 |
| 399953 | C | A | 291432 |
| 400049 | A | C | 291528 |
| 400214 | G | T | 291693 |
| 400503 | G | T | 291982 |
| 400684 | T | G | 292163 |
| 400792 | C | A | 292271 |
| 400945 | T | G | 292424 |
| 401184 | A | C | 292663 |
| 401426 | T | G | 292905 |
| 401561 | T | G | 293040 |
| 401573 | A | C | 293052 |
| 401574 | G | T | 293053 |
| 401585 | A | C | 293064 |
| 401727 | G | T | 293206 |
| 401761 | G | . | 293239 |
| 401762 | G | . | 293239 |
| 401763 | G | . | 293239 |
| 401764 | C | . | 293239 |
| 402018 | C | A | 293493 |
| 402098 | T | G | 293573 |
| 402219 | G | T | 293694 |
| 402277 | . | A | 293753 |
| 402314 | G | T | 293790 |
| 402432 | T | G | 159467 |
| 402433 | C | A | 159466 |
| 402513 | G | T | 159386 |
| 402540 | C | A | 159359 |
| 403730 | . | A | 158167 |
| 403730 | . | A | 158168 |
| 403752 | . | A | 158139 |

|        |   |   |        |
|--------|---|---|--------|
| 403752 | . | A | 158140 |
| 403752 | . | T | 158141 |
| 403752 | . | C | 158142 |
| 403752 | . | A | 158143 |
| 403752 | . | G | 158144 |
| 403792 | C | A | 158099 |
| 403859 | C | T | 158032 |

---
